# Supplementary material
Source: MDPI journal article supplement (https://www.mdpi.com/2073-4352/10/6/476)

# Electronic Supplementary Information #3

## Theoretical Studies

Title: Metal Complexes of  $\pi$ -Expanded Ligands (7): Syntheses, Structures and Properties of Pt(II) Complexes Containing Isomeric 1- and 2-alkyliminomethyl Pyrene Ligands

Authors: Luong Xuan Dien<sup>1,2\*</sup>, Nguyen Xuan Truong<sup>1</sup>

Organization <sup>1</sup> *School of Chemical Engineering, Hanoi University of Science and Technology, No.1 Dai Co Viet, Hai Ba Trung, Vietnam.*

<sup>2</sup> *Department of Chemistry, Graduate School of Science and Engineering, Tokyo Metropolitan University, 1-1 Minami-Ohsawa, Hachi-Oji, Tokyo 192-0397, Japan.*



# Part-1

## Theoretical Studies of *anti-2* (New Pt complex)

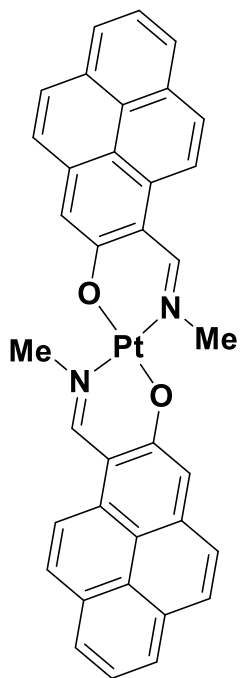

|                      |                                                                                                                                                      |
|----------------------|------------------------------------------------------------------------------------------------------------------------------------------------------|
| Program:             | Gaussian R-09W Ver.7 + Gauss View Ver.5                                                                                                              |
| Method:              | B3LYP                                                                                                                                                |
| Basis Set:           | Hay-Wadt's ECP for Pt, 6-31G(d) for C, H, N, and O                                                                                                   |
| Optimized Structure: | $C_i$                                                                                                                                                |
| Comment#1:           | Considering the cost of the calculation, alkyl groups on the nitrogens, $n\text{-C}_8\text{H}_{17}$ of <b>2(Pt)</b> , are replaced by methyl groups. |
| Comment #2:          | The results of TDDFT are shown in <i>Supporting Information #2(Pt)</i> along with experimental data.                                                 |



# Comparison of the Bond Distances (Å)

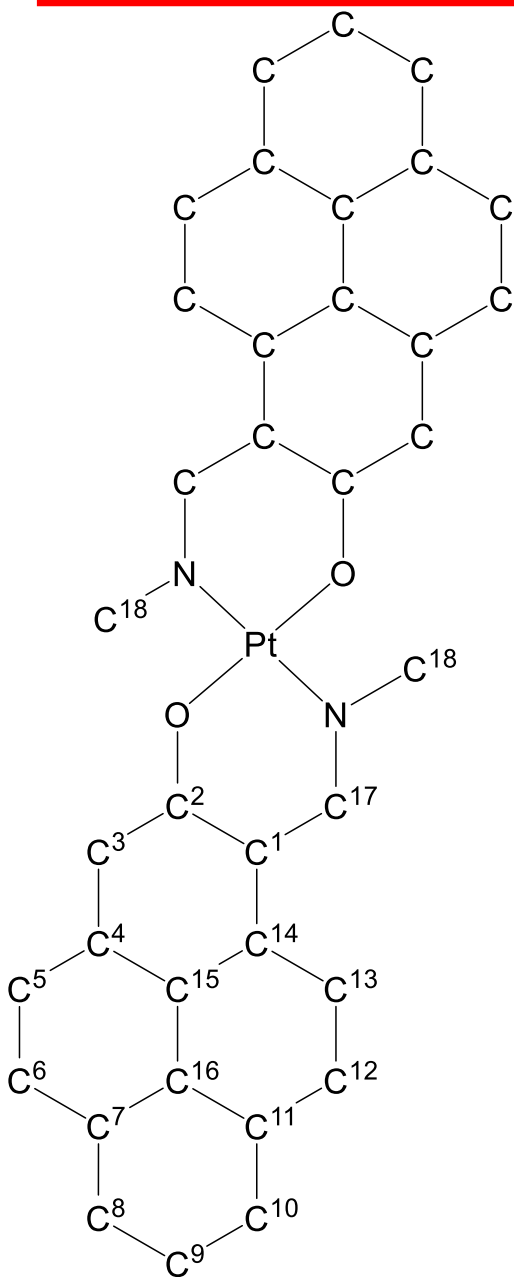

| Bond                            | Theoretical<br>Study <sup>†</sup> | Diffraction                                       |                                  | Bond  | Theoretical<br>Study | Diffraction                                       |  |
|---------------------------------|-----------------------------------|---------------------------------------------------|----------------------------------|-------|----------------------|---------------------------------------------------|--|
|                                 |                                   | Study for <b>2<sup>††</sup></b><br>Molecule<br>#1 |                                  |       |                      | Study for <b>2<sup>††</sup></b><br>Molecule<br>#1 |  |
| Pt-N                            | 2.029                             | 2.000(7)                                          | C <sup>6</sup> -C <sup>7</sup>   | 1.440 | 1.429(14)            |                                                   |  |
| Pt-O                            | 2.011                             | 1.953(6)                                          | C <sup>7</sup> -C <sup>8</sup>   | 1.400 | 1.388(14)            |                                                   |  |
| O-C <sup>2</sup>                | 1.308                             | 1.307(13)                                         | C <sup>7</sup> -C <sup>16</sup>  | 1.430 | 1.419(13)            |                                                   |  |
| N-C <sup>17</sup>               | 1.303                             | 1.294(12)                                         | C <sup>8</sup> -C <sup>9</sup>   | 1.399 | 1.398(14)            |                                                   |  |
| N-C <sup>18</sup>               | 1.466                             | 1.482(11)                                         | C <sup>9</sup> -C <sup>10</sup>  | 1.389 | 1.389(15)            |                                                   |  |
| C <sup>1</sup> -C <sup>2</sup>  | 1.434                             | 1.418(11)                                         | C <sup>10</sup> -C <sup>11</sup> | 1.409 | 1.400(14)            |                                                   |  |
| C <sup>1</sup> -C <sup>14</sup> | 1.446                             | 1.453(12)                                         | C <sup>11</sup> -C <sup>12</sup> | 1.427 | 1.452(15)            |                                                   |  |
| C <sup>1</sup> -C <sup>17</sup> | 1.433                             | 1.425(12)                                         | C <sup>11</sup> -C <sup>16</sup> | 1.425 | 1.391(13)            |                                                   |  |
| C <sup>2</sup> -C <sup>3</sup>  | 1.414                             | 1.446(16)                                         | C <sup>12</sup> -C <sup>13</sup> | 1.366 | 1.328(14)            |                                                   |  |
| C <sup>3</sup> -C <sup>4</sup>  | 1.386                             | 1.403(14)                                         | C <sup>13</sup> -C <sup>14</sup> | 1.437 | 1.409(13)            |                                                   |  |
| C <sup>4</sup> -C <sup>5</sup>  | 1.442                             | 1.393(13)                                         | C <sup>14</sup> -C <sup>15</sup> | 1.424 | 1.435(12)            |                                                   |  |
| C <sup>4</sup> -C <sup>15</sup> | 1.437                             | 1.417(13)                                         | C <sup>15</sup> -C <sup>16</sup> | 1.428 | 1.434(12)            |                                                   |  |
| C <sup>5</sup> -C <sup>6</sup>  | 1.358                             | 1.337(15)                                         |                                  |       |                      |                                                   |  |

<sup>†</sup> This Work  
<sup>††</sup> This Work, n-Heptyl



## Comparison of the Important Bond Angles (degree)

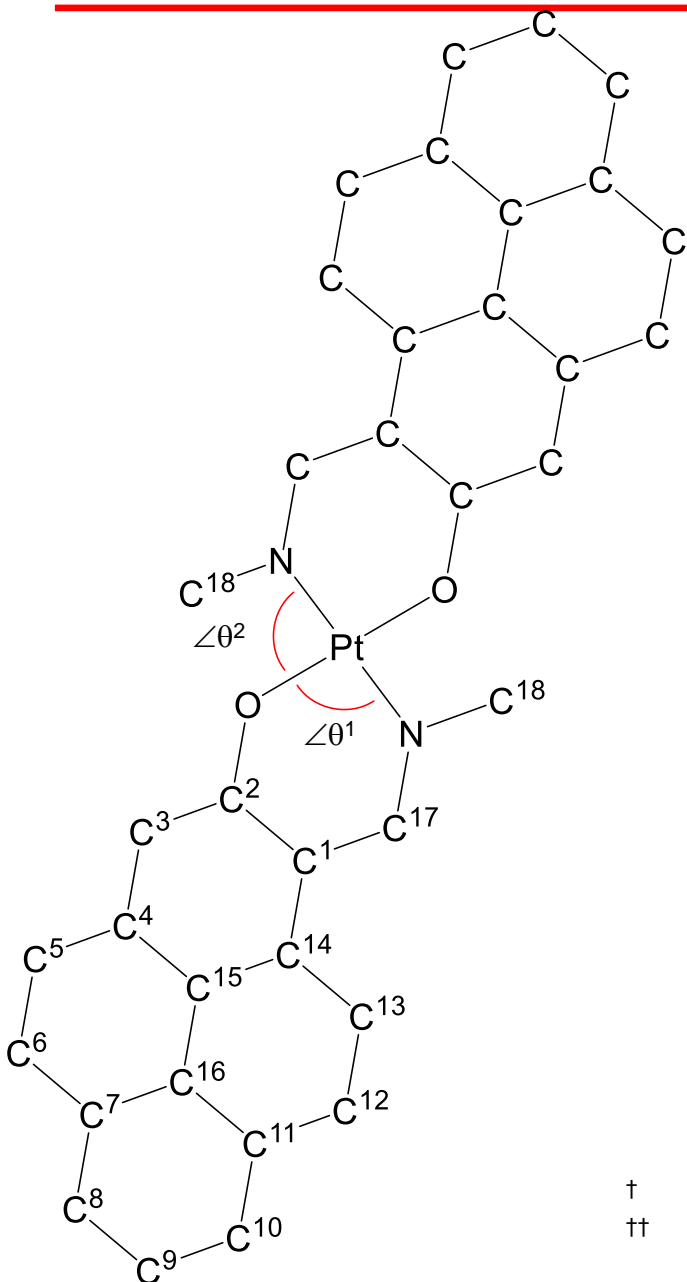

| Angle                                           | Theoretical<br>Study <sup>†</sup> | Diffraction<br>Study <sup>††</sup> |
|-------------------------------------------------|-----------------------------------|------------------------------------|
|                                                 |                                   | Molecule<br>#1                     |
| N-Pt-O ( $\angle\theta^1$ )                     | 91.21                             | 93.0(3)                            |
| N-Pt-O ( $\angle\theta^2$ )                     | 88.78                             | 87.0(3)                            |
| Pt-O-C <sup>2</sup>                             | 127.64                            | 125.6(6)                           |
| O-C <sup>2</sup> -C <sup>1</sup>                | 125.58                            | 126.9(10)                          |
| C <sup>2</sup> -C <sup>1</sup> -C <sup>17</sup> | 121.76                            | 120.2(10)                          |
| C <sup>1</sup> -C <sup>17</sup> -N              | 129.39                            | 130.7(9)                           |
| C <sup>17</sup> -N-Pt                           | 124.07                            | 121.8(6)                           |
| C <sup>17</sup> -N-C <sup>18</sup>              | 117.50                            | 117.6(8)                           |
| C <sup>18</sup> -N-Pt                           | 118.42                            | 120.3(6)                           |
| C <sup>14</sup> -C <sup>1</sup> -C <sup>2</sup> | 119.37                            | 120.4(9)                           |
| C <sup>1</sup> -C <sup>2</sup> -C <sup>3</sup>  | 118.84                            | 117.2(10)                          |

<sup>†</sup> This Work

<sup>††</sup> This Work, n-Heptyl



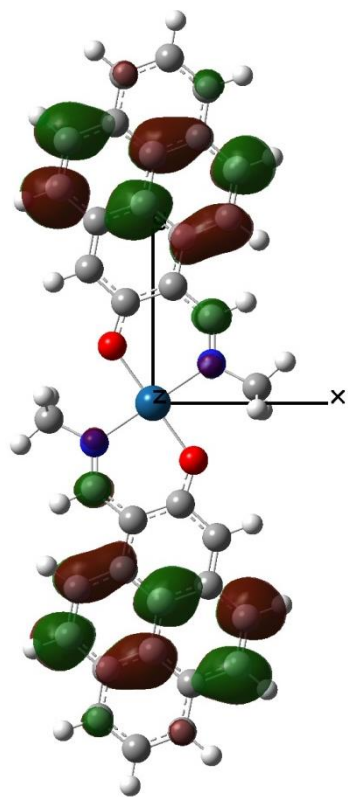

$a_u, \phi_{152}$   
+0.00 eV

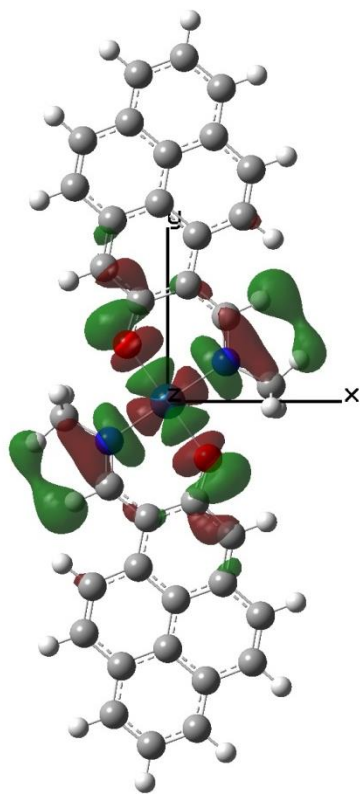

$a_g, \phi_{151}$   
-0.05 eV

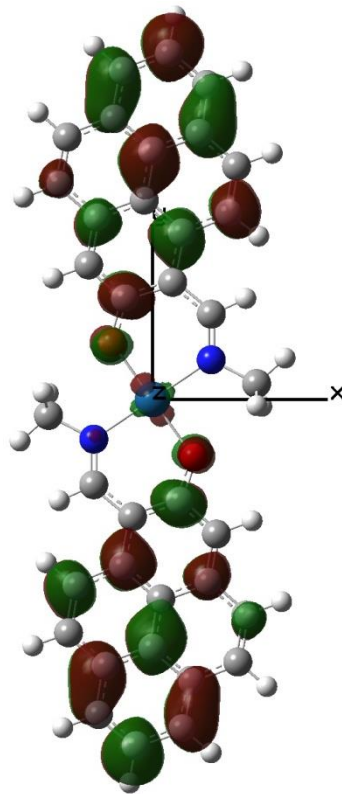

$a_g, \phi_{150}$   
-0.32 eV

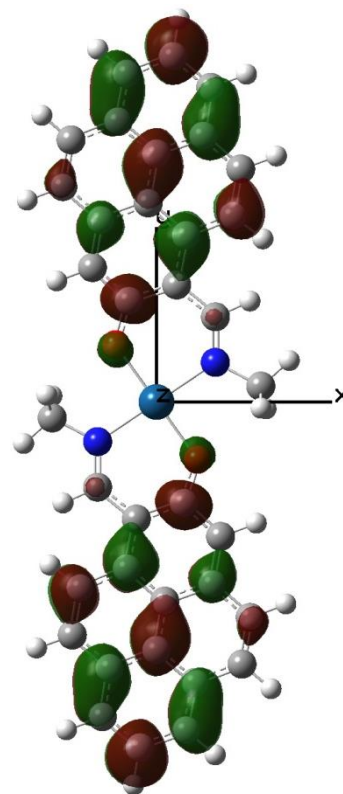

$a_u, \phi_{149}$   
-0.38 eV

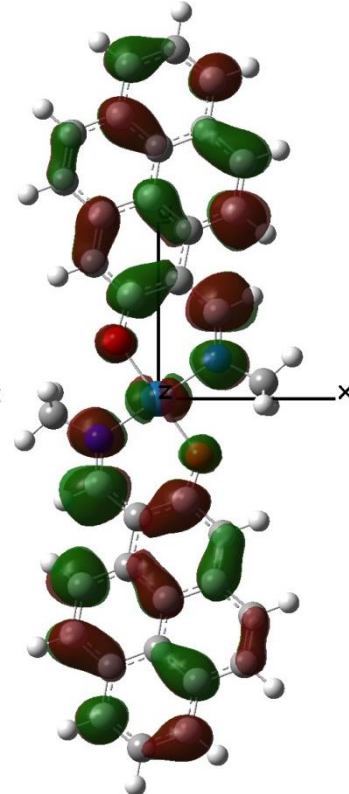

$a_g, \phi_{148}$   
-0.48 eV



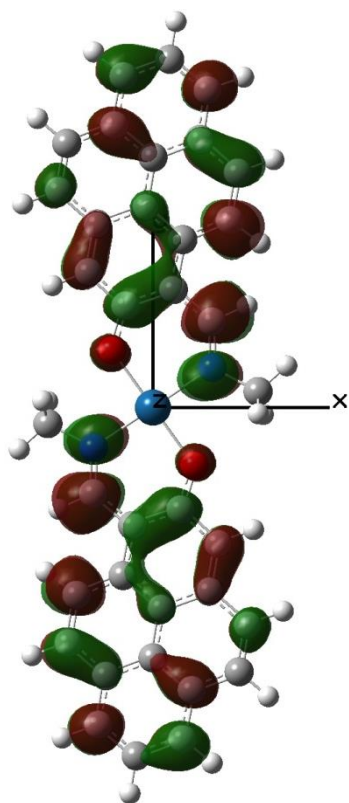

$a_u, \phi_{147}$   
-0.68 eV

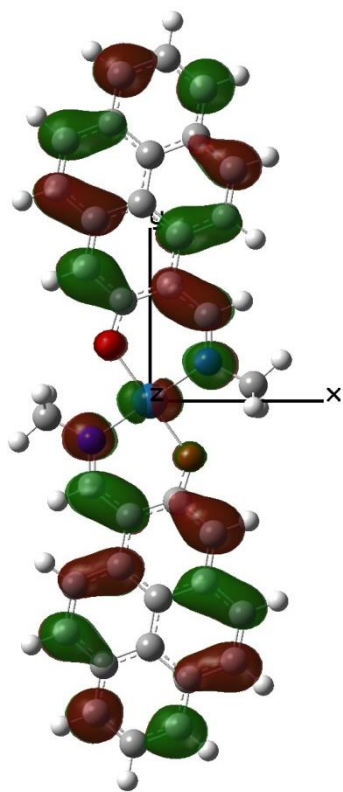

$a_g, \phi_{146}$   
-1.89 eV  
LUMO+1

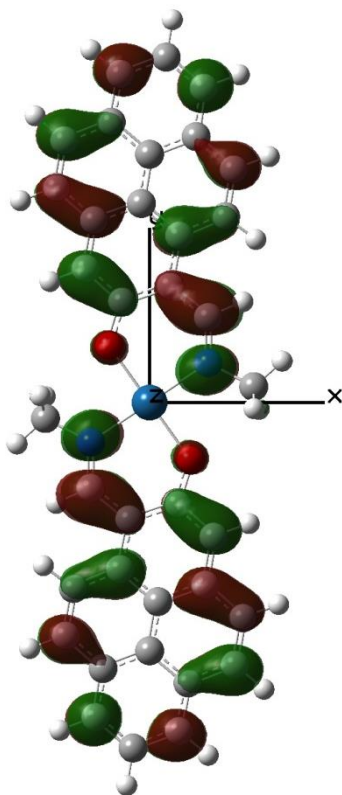

$a_u, \phi_{145}$   
-2.07 eV  
LUMO

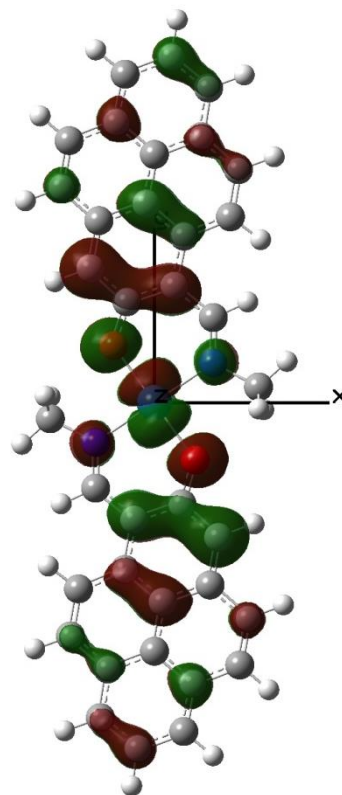

$a_g, \phi_{144}$   
-4.89 eV  
HOMO

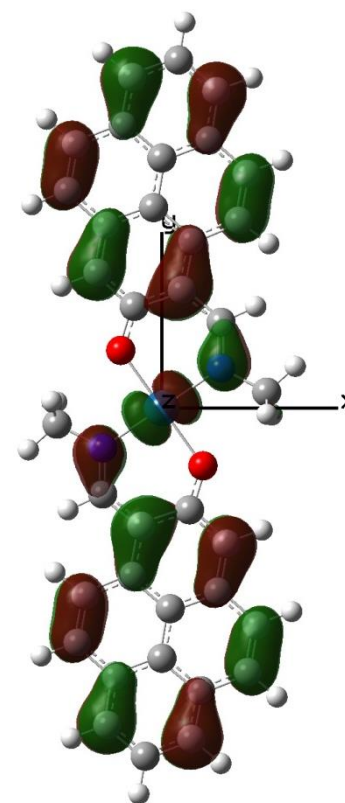

$a_g, \phi_{143}$   
-5.28 eV  
HOMO-1



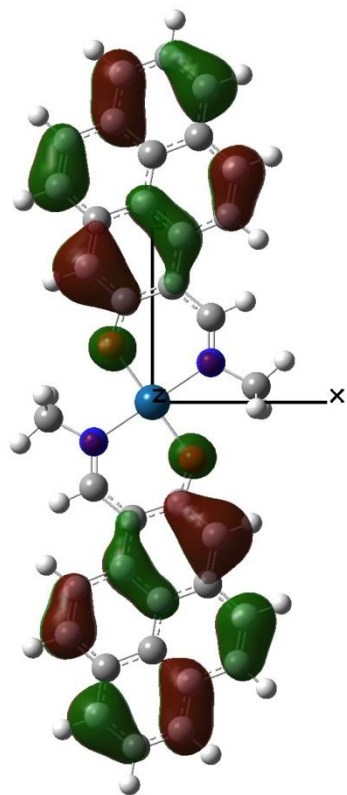

$a_u, \phi_{142}$   
-5.36 eV

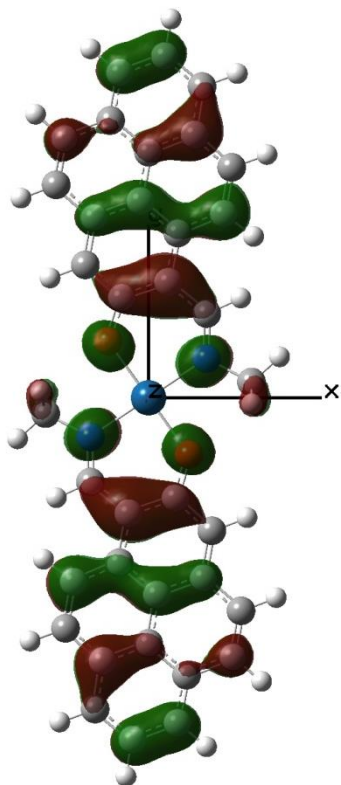

$a_u, \phi_{141}$   
-5.65 eV

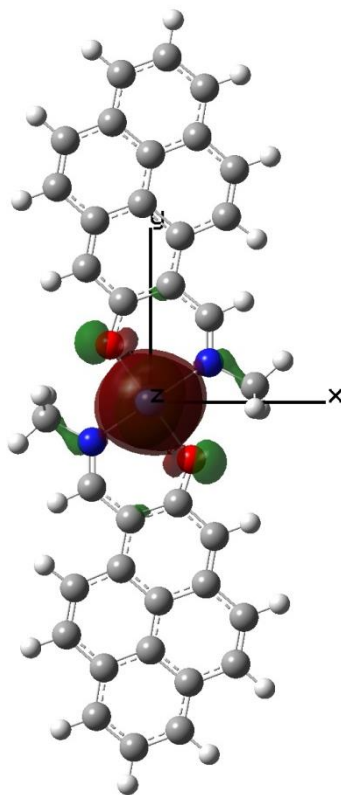

$a_g, \phi_{140}$   
-6.16 eV

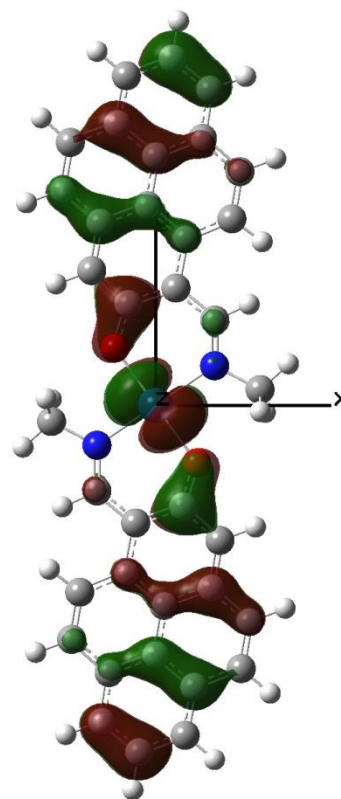

$a_g, \phi_{139}$   
-6.50 eV

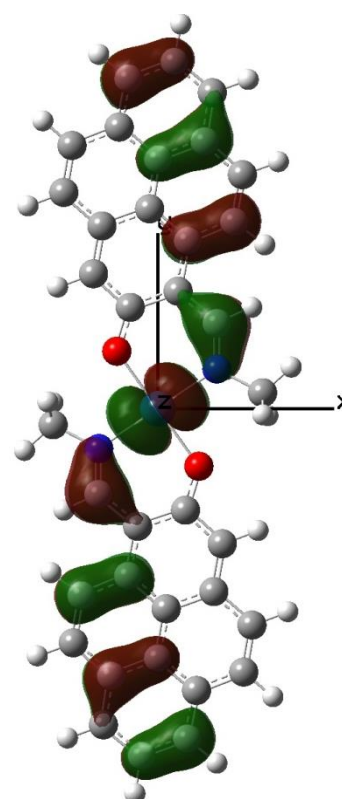

$a_g, \phi_{138}$   
-6.54 eV



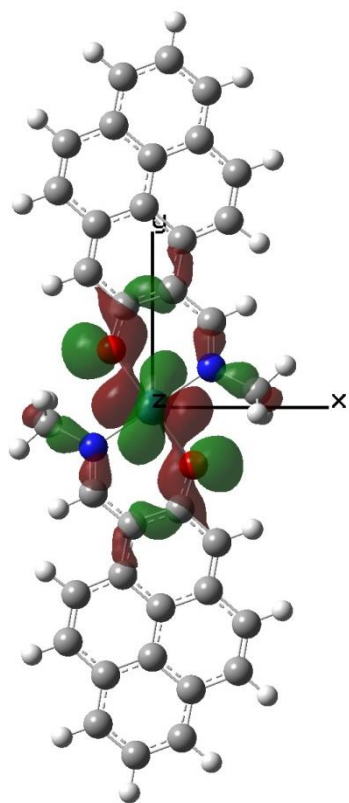

$a_g, \phi_{137}$   
-6.84 eV

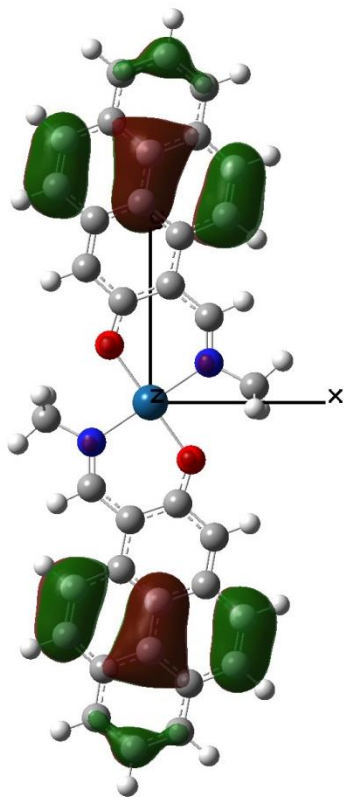

$a_u, \phi_{136}$   
-6.87 eV

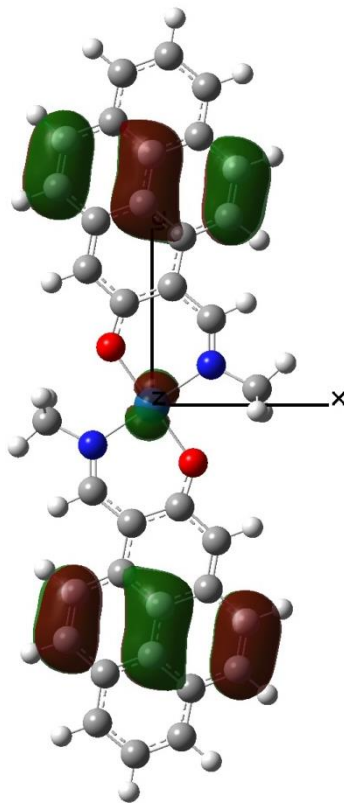

$a_g, \phi_{135}$   
-6.91 eV

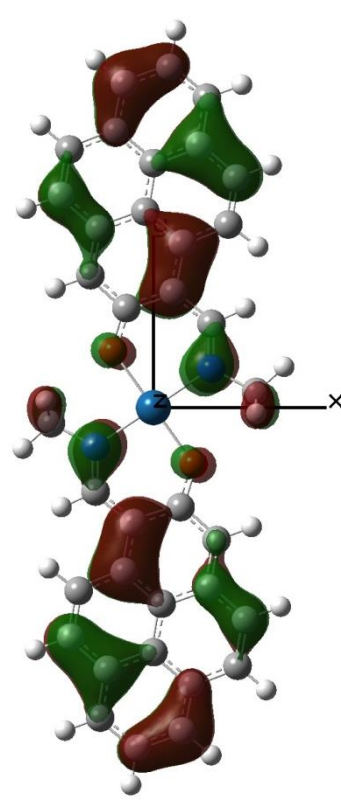

$a_u, \phi_{134}$   
-7.32 eV

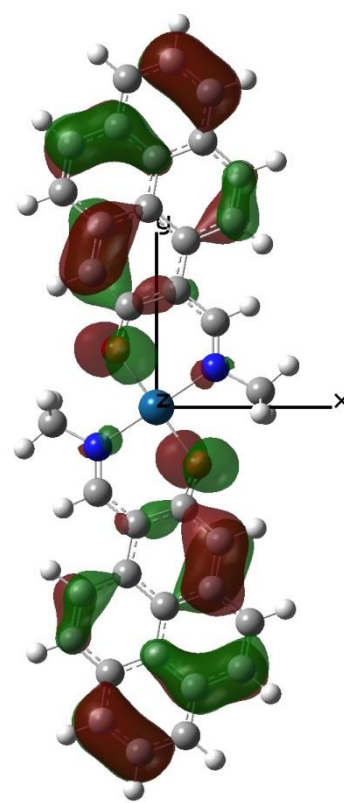

$a_u, \phi_{133}$   
-7.37 eV



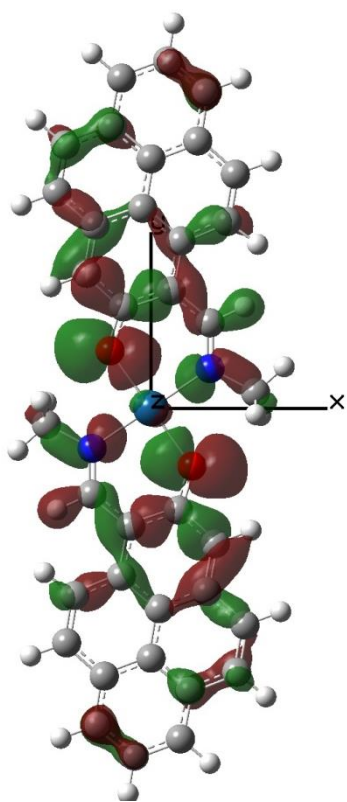

$a_u, \phi_{132}$   
-7.40 eV

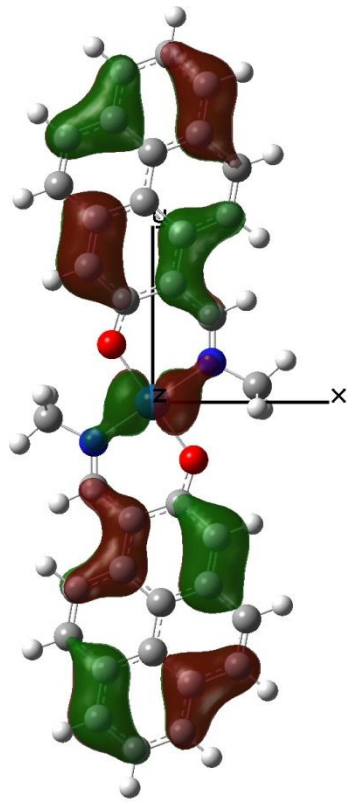

$a_g, \phi_{131}$   
-7.53 eV

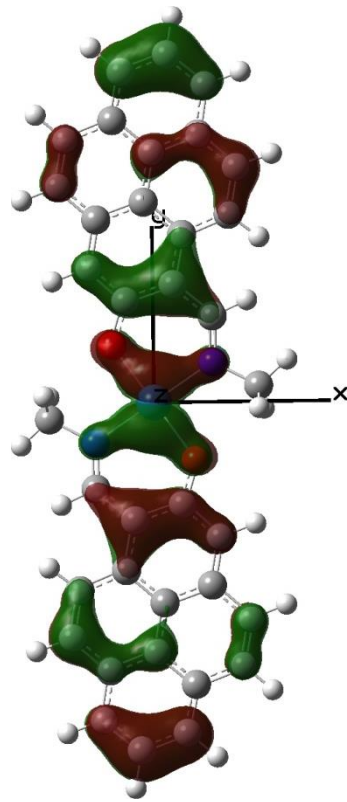

$a_g, \phi_{130}$   
-7.75 eV

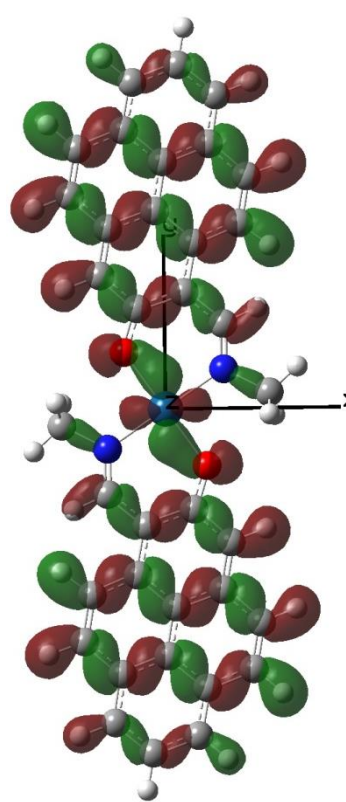

$a_g, \phi_{129}$   
-8.56 eV

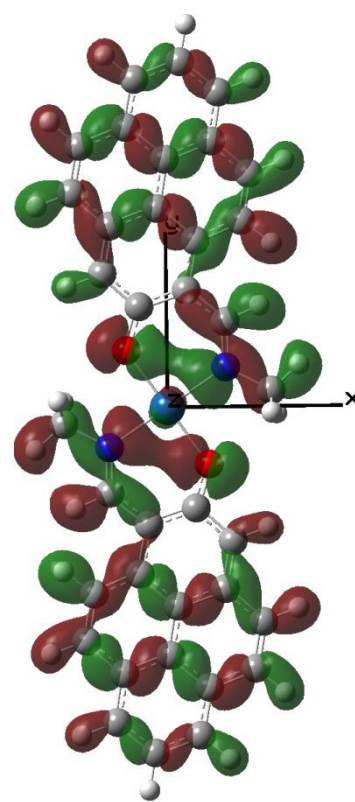

$a_u, \phi_{128}$   
-8.67 eV



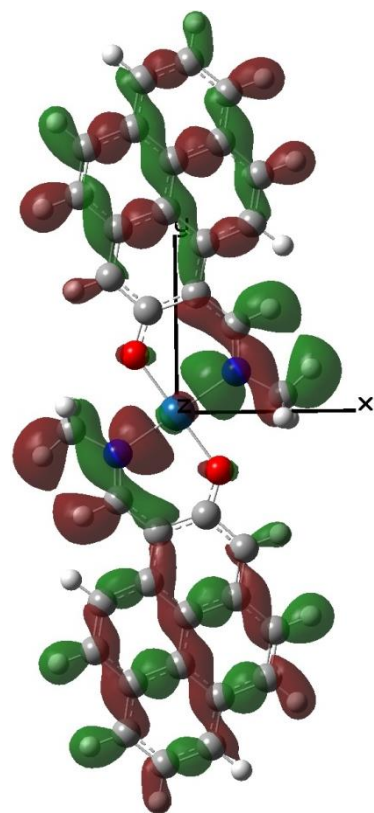

$a_u, \phi_{127}$   
-8.85 eV

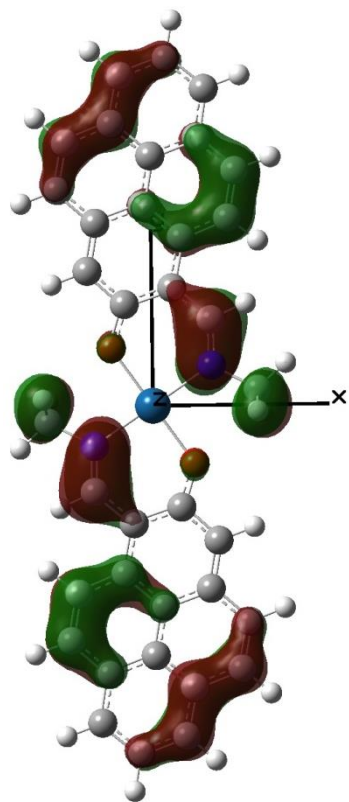

$a_u, \phi_{126}$   
-8.96 eV

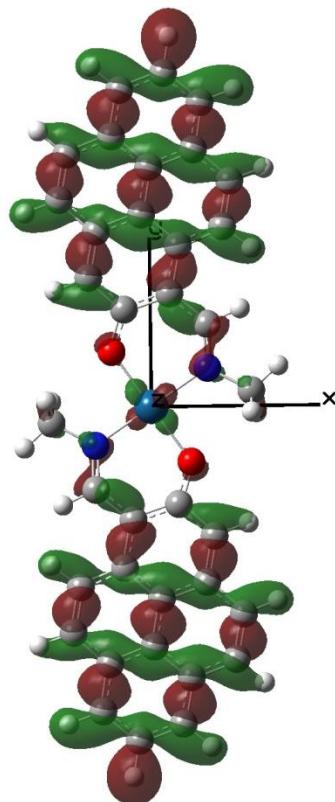

$a_g, \phi_{125}$   
-9.08 eV

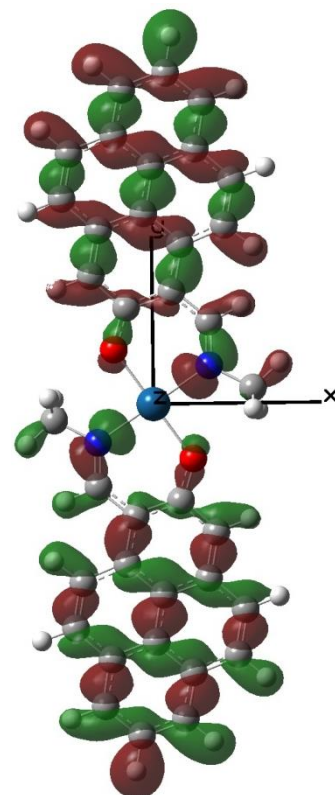

$b_g, \phi_{124}$   
-9.11 eV

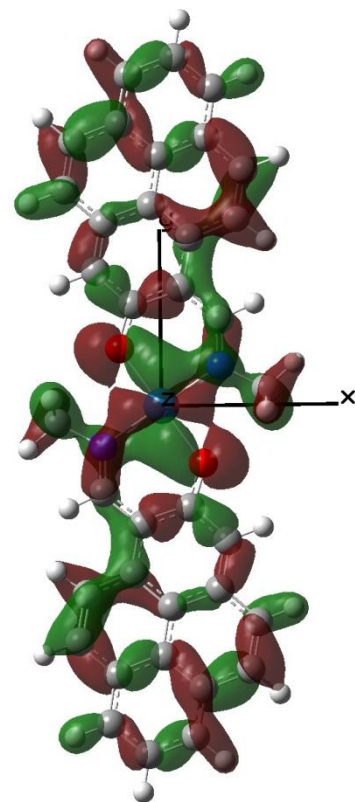

$a_u, \phi_{123}$   
-9.12 eV



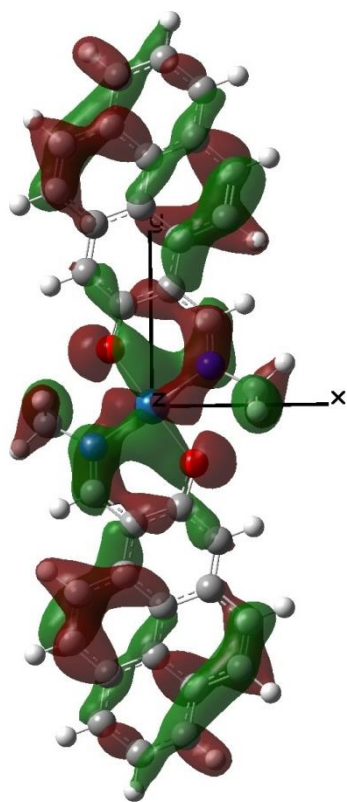

$a_u, \phi_{122}$   
-9.14 eV

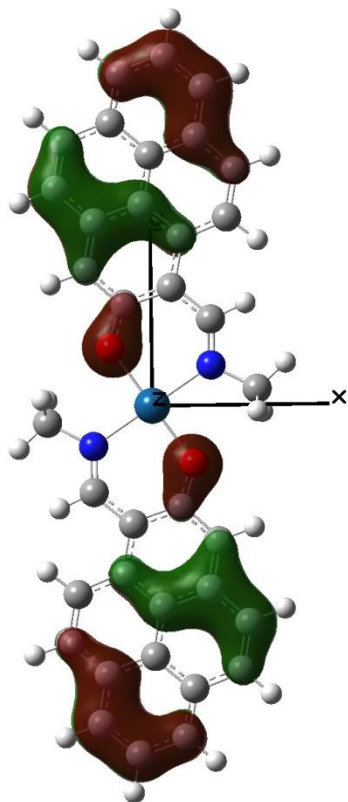

$a_u, \phi_{121}$   
-9.23 eV

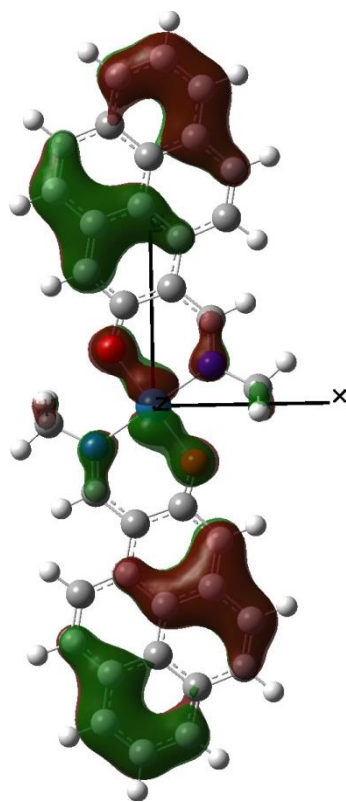

$a_g, \phi_{120}$   
-9.36 eV

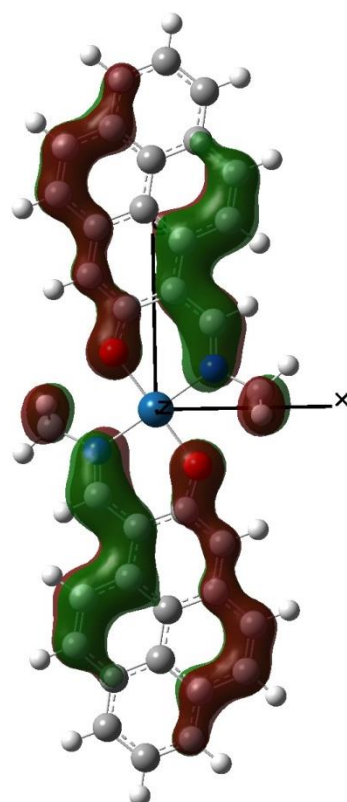

$b_g, \phi_{119}$   
-9.48 eV

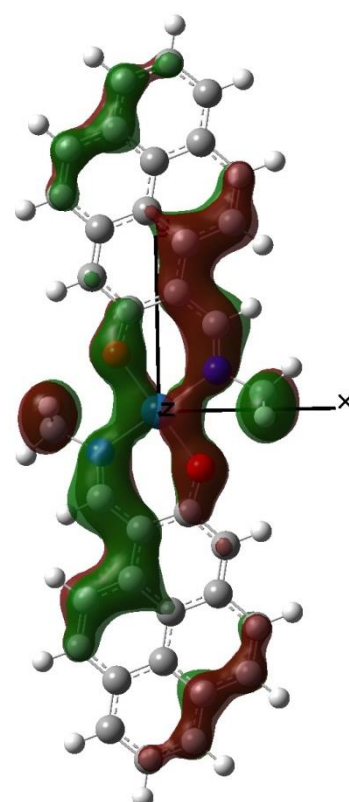

$a_u, \phi_{118}$   
-9.55 eV



# Part-2

## Theoretical Studies of *anti-2* (Old Pt complex)

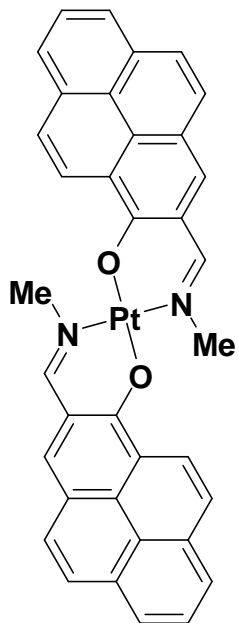

|                      |                                                                                                                                                      |
|----------------------|------------------------------------------------------------------------------------------------------------------------------------------------------|
| Program:             | Gaussian R-09W Ver.7 + Gauss View Ver.5                                                                                                              |
| Method:              | B3LYP                                                                                                                                                |
| Basis Set:           | Hay-Wadt's ECP for Pt, 6-31G(d) for C, H, N, and O                                                                                                   |
| Optimized Structure: | $C_{2h}$                                                                                                                                             |
| Comment#1:           | Considering the cost of the calculation, alkyl groups on the nitrogens, $n\text{-C}_8\text{H}_{17}$ of <b>1(Pt)</b> , are replaced by methyl groups. |



# Comparison of the Bond Distances (Å)

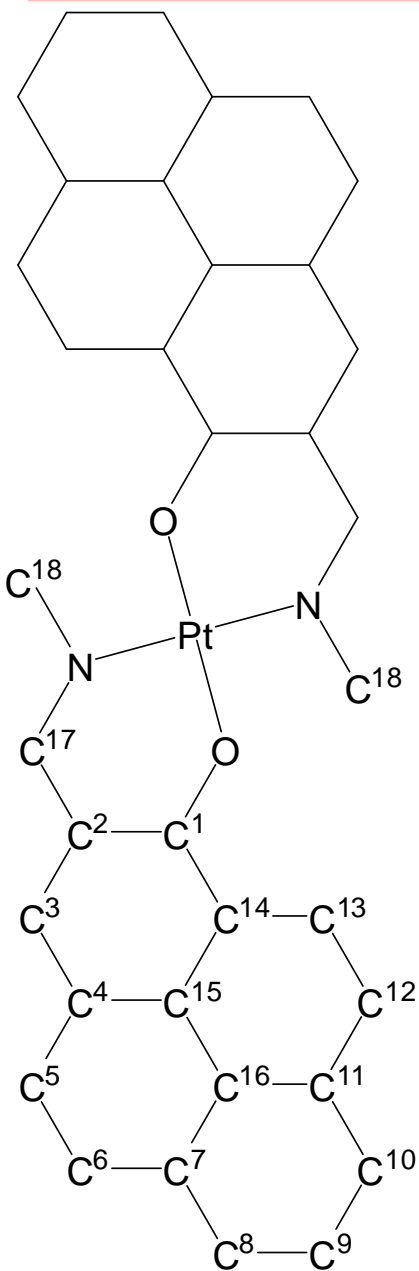

| Bond                            | Theoretical<br>Study <sup>†</sup> | Diffraction                     |                | Bond                             | Theoretical<br>Study | Diffraction                     |                |
|---------------------------------|-----------------------------------|---------------------------------|----------------|----------------------------------|----------------------|---------------------------------|----------------|
|                                 |                                   | Study for <b>2<sup>††</sup></b> |                |                                  |                      | Study for <b>2<sup>††</sup></b> |                |
|                                 |                                   | Molecule<br>#1                  | Molecule<br>#2 |                                  |                      | Molecule<br>#1                  | Molecule<br>#2 |
| Pt-N                            | 2.036                             | 2.008(8)                        | 2.014(8)       | C <sup>6</sup> -C <sup>7</sup>   | 1.442                | 1.450(14)                       | 1.441(14)      |
| Pt-O                            | 2.020                             | 1.996(6)                        | 1.991(7)       | C <sup>7</sup> -C <sup>8</sup>   | 1.401                | 1.403(14)                       | 1.393(15)      |
| O-C <sup>1</sup>                | 1.306                             | 1.291(10)                       | 1.292(10)      | C <sup>7</sup> -C <sup>16</sup>  | 1.431                | 1.441(13)                       | 1.405(13)      |
| N-C <sup>17</sup>               | 1.299                             | 1.295(11)                       | 1.288(11)      | C <sup>8</sup> -C <sup>9</sup>   | 1.398                | 1.392(14)                       | 1.353(15)      |
| N-C <sup>18</sup>               | 1.466                             | 1.479(11)                       | 1.479(12)      | C <sup>9</sup> -C <sup>10</sup>  | 1.390                | 1.378(14)                       | 1.400(16)      |
| C <sup>1</sup> -C <sup>2</sup>  | 1.429                             | 1.430(12)                       | 1.394(13)      | C <sup>10</sup> -C <sup>11</sup> | 1.409                | 1.400(14)                       | 1.372(16)      |
| C <sup>1</sup> -C <sup>14</sup> | 1.438                             | 1.434(12)                       | 1.440(13)      | C <sup>11</sup> -C <sup>12</sup> | 1.433                | 1.419(13)                       | 1.435(13)      |
| C <sup>2</sup> -C <sup>3</sup>  | 1.414                             | 1.408(12)                       | 1.405(12)      | C <sup>11</sup> -C <sup>16</sup> | 1.429                | 1.424(13)                       | 1.429(14)      |
| C <sup>2</sup> -C <sup>17</sup> | 1.434                             | 1.445(13)                       | 1.434(14)      | C <sup>12</sup> -C <sup>13</sup> | 1.365                | 1.359(12)                       | 1.329(14)      |
| C <sup>3</sup> -C <sup>4</sup>  | 1.386                             | 1.390(13)                       | 1.367(14)      | C <sup>13</sup> -C <sup>14</sup> | 1.431                | 1.414(12)                       | 1.443(13)      |
| C <sup>4</sup> -C <sup>5</sup>  | 1.439                             | 1.407(12)                       | 1.452(12)      | C <sup>14</sup> -C <sup>15</sup> | 1.419                | 1.422(13)                       | 1.437(12)      |
| C <sup>4</sup> -C <sup>15</sup> | 1.436                             | 1.410(13)                       | 1.435(13)      | C <sup>15</sup> -C <sup>16</sup> | 1.429                | 1.415(13)                       | 1.419(14)      |
| C <sup>5</sup> -C <sup>6</sup>  | 1.359                             | 1.343(13)                       | 1.313(14)      |                                  |                      |                                 |                |

<sup>†</sup> This Work

<sup>††</sup> This Work, n-Octyl



## Comparison of the Important Bond Angles (degree)

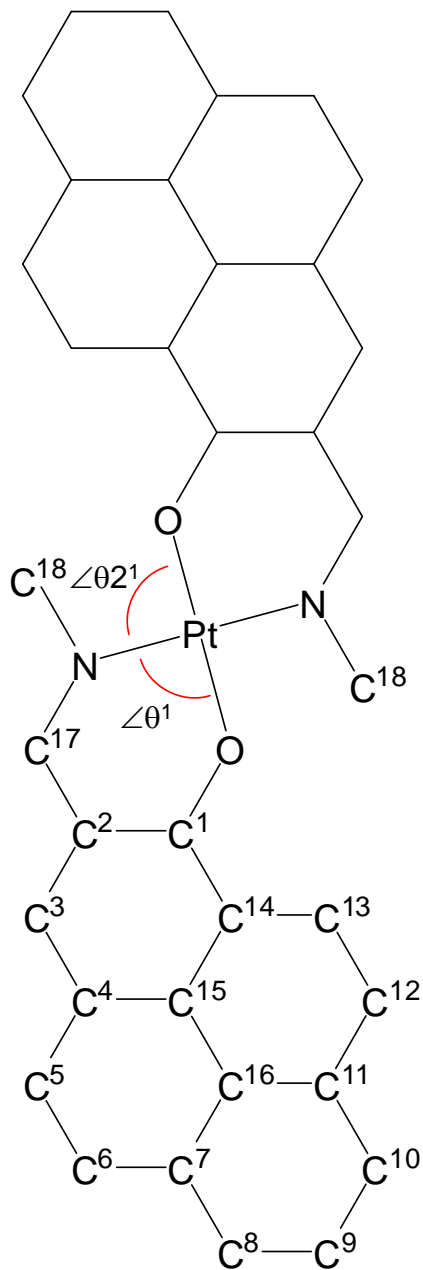

| Angle                                           | Theoretical<br>Study <sup>†</sup> | Diffraction<br>Study <sup>††</sup> |                |
|-------------------------------------------------|-----------------------------------|------------------------------------|----------------|
|                                                 |                                   | Molecule<br>#1                     | Molecule<br>#2 |
| N-Pt-O ( $\angle\theta^1$ )                     | 92.20                             | 92.4(3)                            | 91.8(3)        |
| N-Pt-O ( $\angle\theta^2$ )                     | 87.80                             | 87.6(3)                            | 88.2(3)        |
| Pt-O-C <sup>1</sup>                             | 127.29                            | 126.7(6)                           | 127.1(6)       |
| O-C <sup>1</sup> -C <sup>2</sup>                | 124.45                            | 124.9(8)                           | 125.3(9)       |
| C <sup>1</sup> -C <sup>2</sup> -C <sup>17</sup> | 123.96                            | 123.0(8)                           | 123.7(9)       |
| C <sup>2</sup> -C <sup>17</sup> -N              | 129.05                            | 128.0(9)                           | 128.0(9)       |
| C <sup>17</sup> -N-Pt                           | 123.04                            | 123.5(7)                           | 123.7(7)       |
| C <sup>17</sup> -N-C <sup>18</sup>              | 117.56                            | 115.3(8)                           | 115.4(8)       |
| C <sup>18</sup> -N-Pt                           | 119.39                            | 121.2(6)                           | 120.9(6)       |
| C <sup>14</sup> -C <sup>1</sup> -C <sup>2</sup> | 118.19                            | 117.2(8)                           | 118.3(9)       |
| C <sup>1</sup> -C <sup>2</sup> -C <sup>3</sup>  | 119.84                            | 120.3(8)                           | 120.6(10)      |

<sup>†</sup> This Work

<sup>††</sup> This Work



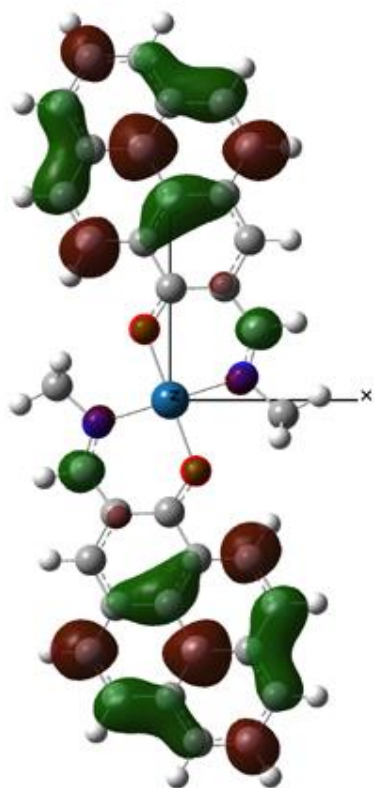

$a_u, \phi_{150}$   
+0.00 eV

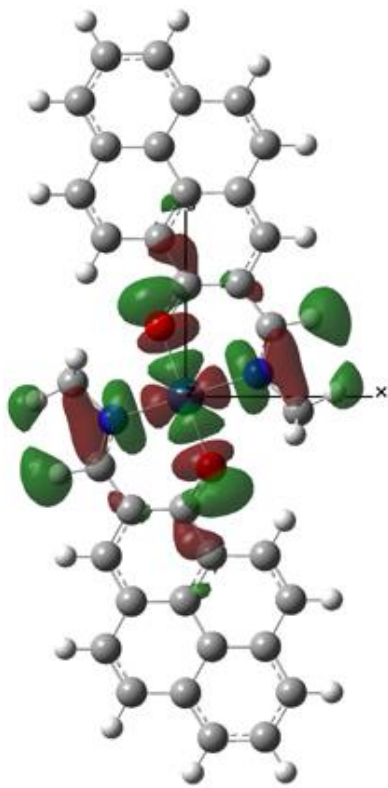

$a_g, \phi_{149}$   
-0.44 eV

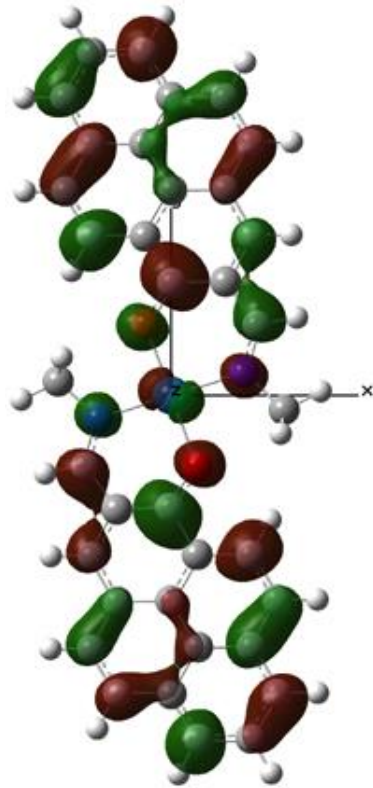

$b_g, \phi_{148}$   
-1.11 eV

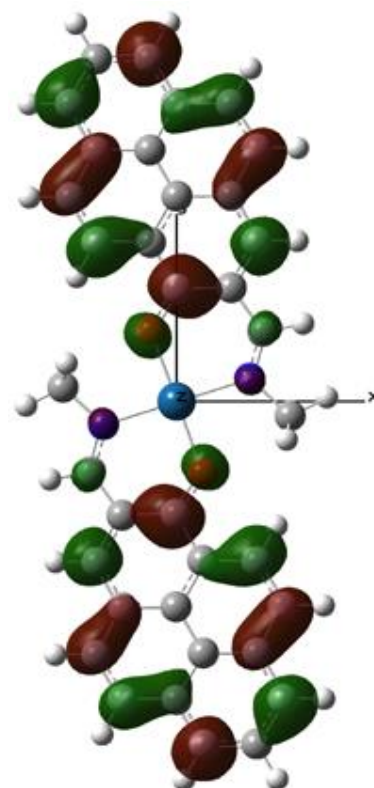

$a_u, \phi_{147}$   
-1.25 eV



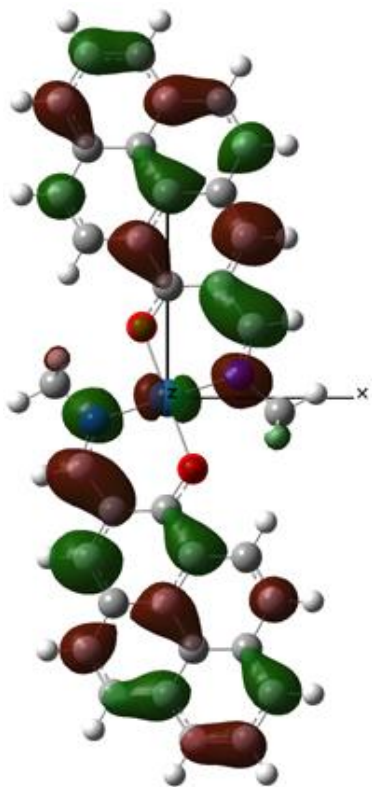

$b_g, \phi_{146}$   
-1.58 eV  
LUMO+1

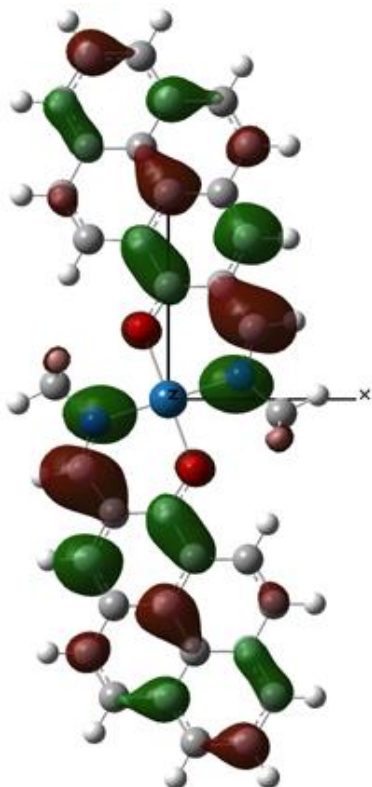

$a_u, \phi_{145}$   
-1.84 eV  
LUMO

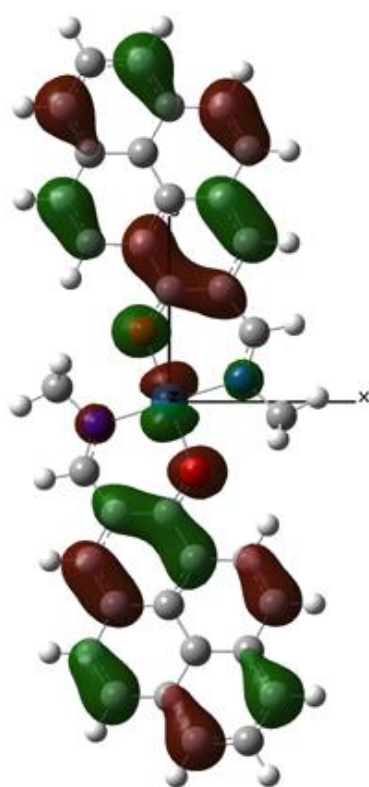

$b_g, \phi_{144}$   
-4.69 eV  
HOMO

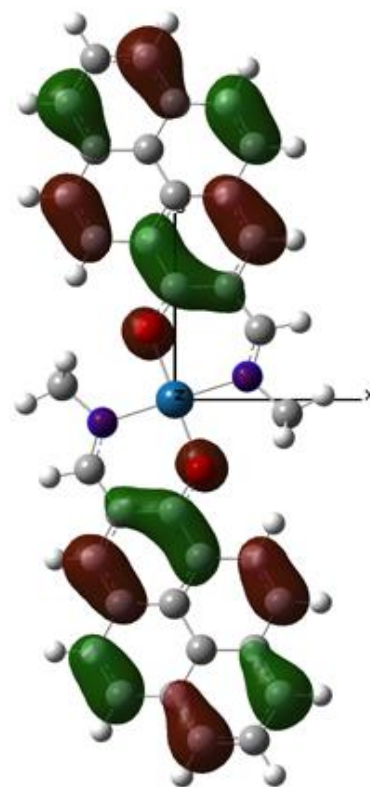

$a_u, \phi_{143}$   
-4.93 eV  
HOMO-1  
bonding combination of  
HOMO( $\phi_{68}$ ) of the ligand



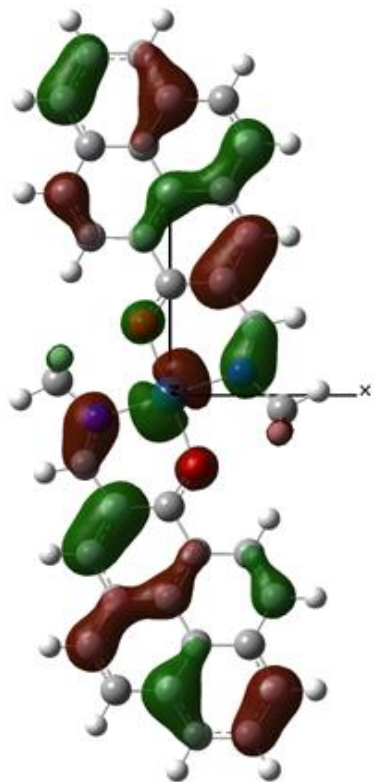

$b_g, \phi_{142}$   
-5.84 eV

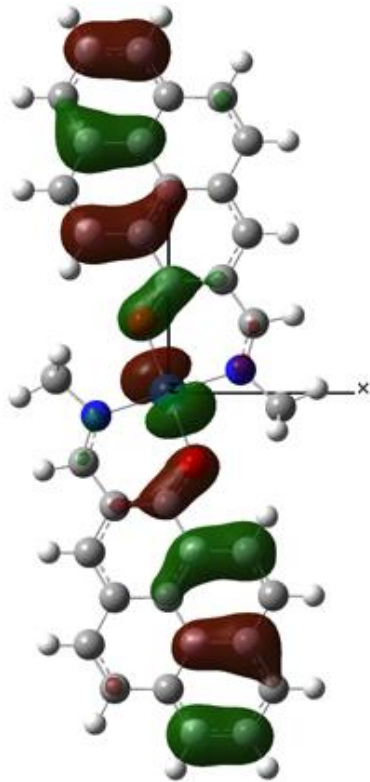

$b_g, \phi_{141}$   
-6.23<sup>5</sup> eV

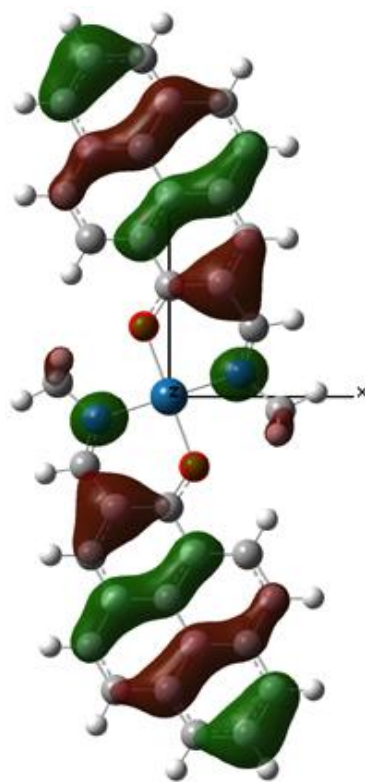

$a_u, \phi_{140}$   
-6.24<sup>1</sup> eV  
bonding combination  
of  $\phi_{67}$  of the ligand

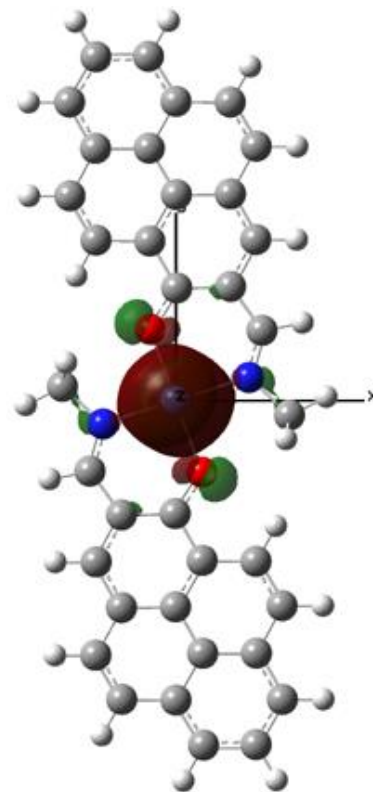

$a_g, \phi_{139}$   
-6.42 eV



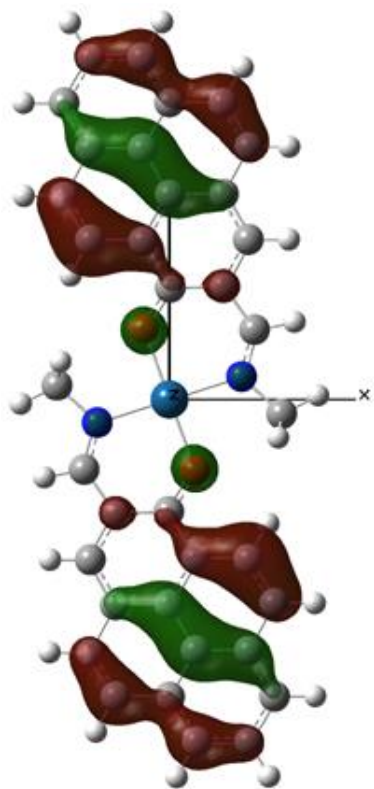

$a_u, \phi_{138}$   
-6.72 eV

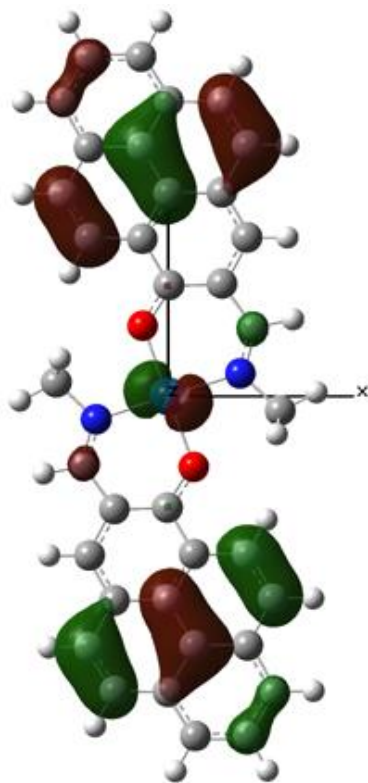

$b_g, \phi_{137}$   
-6.78 eV

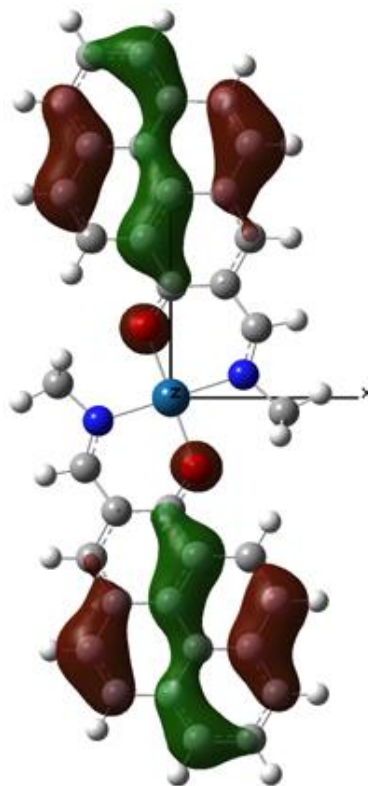

$a_u, \phi_{136}$   
-6.93<sup>6</sup> eV

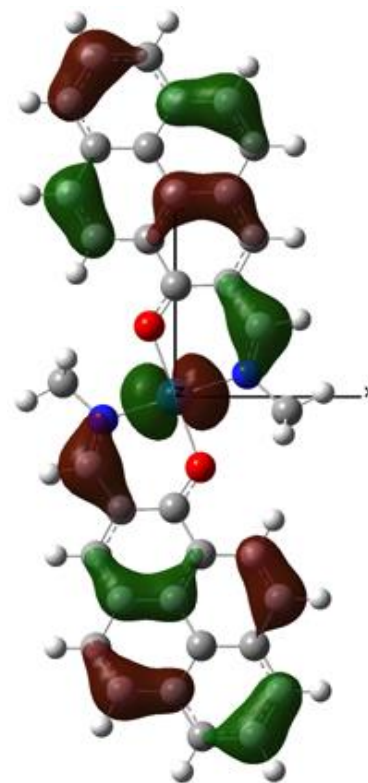

$b_g, \phi_{135}$   
-6.94<sup>4</sup> eV



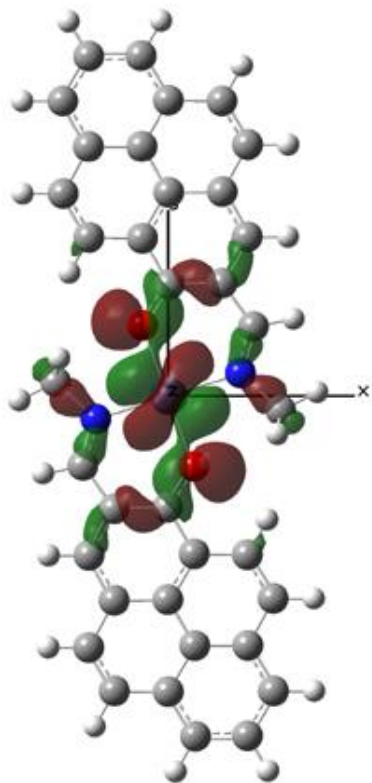

$a_g, \phi_{134}$   
-7.12 eV

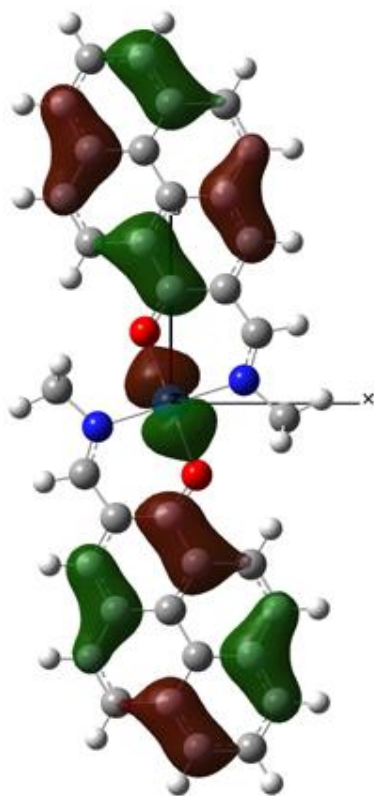

$b_g, \phi_{133}$   
-7.32 eV

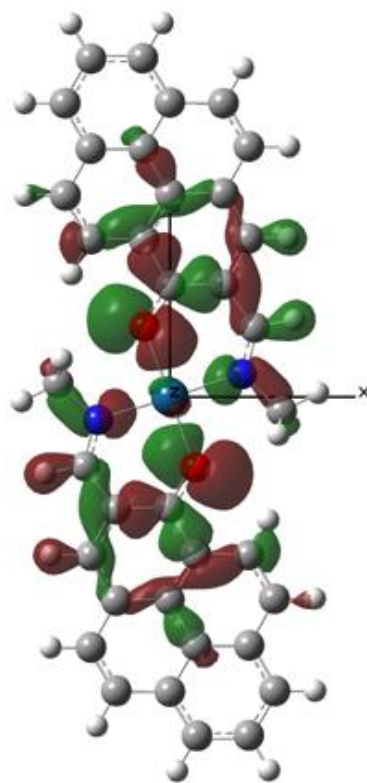

$b_u, \phi_{132}$   
-7.66 eV

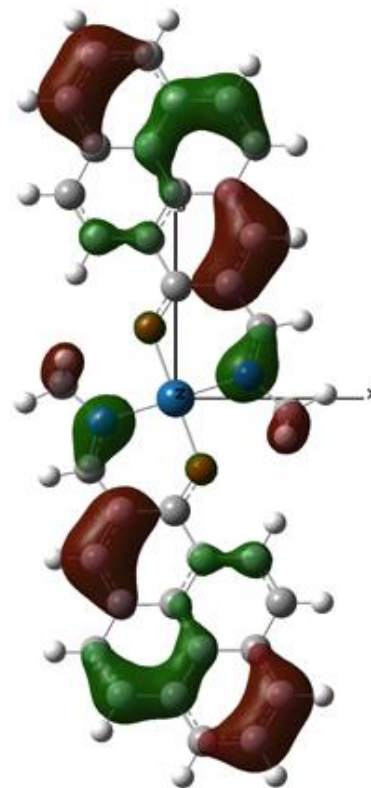

$a_u, \phi_{131}$   
-7.72 eV



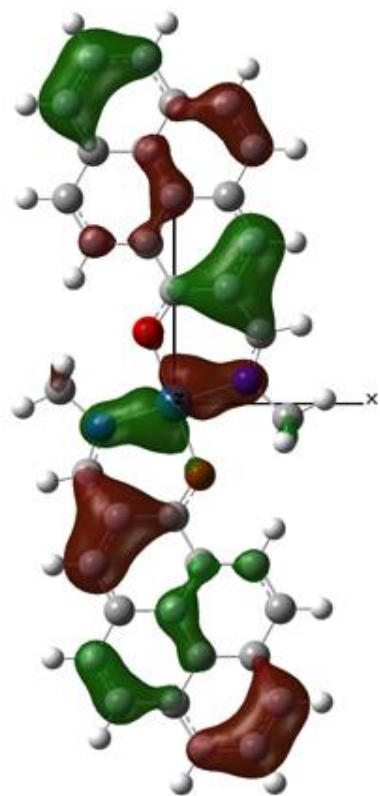

$b_g, \phi_{130}$   
 -8.05 eV  
 bonding interaction of  $d_{yz}$   
 with the ligand

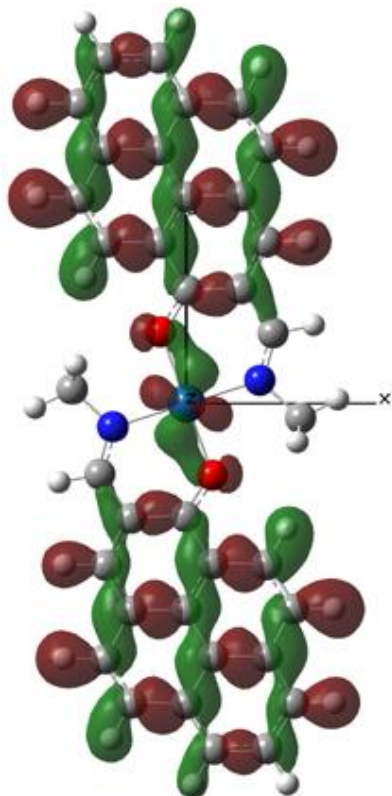

$a_g, \phi_{129}$   
 -8.60 eV  
 bonding interaction of  $d_{xy}$   
 with the ligand

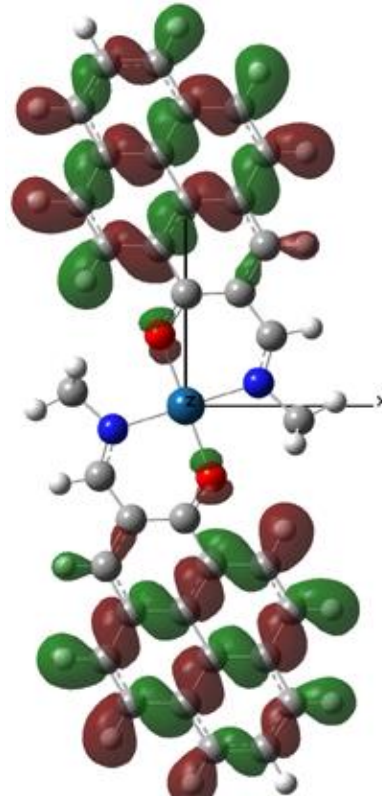

$b_u, \phi_{128}$   
 -8.64 eV  
 antibonding interaction of  
 $\phi_{xxx}$  of the ligand

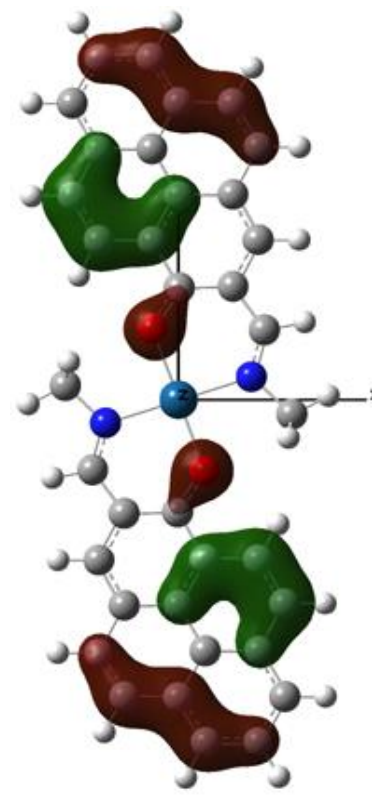

$a_u, \phi_{127}$   
 -8.86 eV  
 bonding interaction of  
 $\phi_{xxx}$  of the ligand



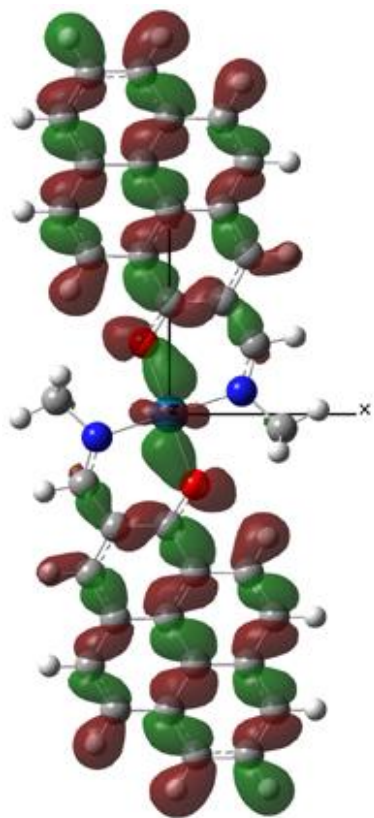

$a_g, \phi_{126}$   
-8.88 eV  
bonding interaction of  $d_{xy}$   
with the ligand

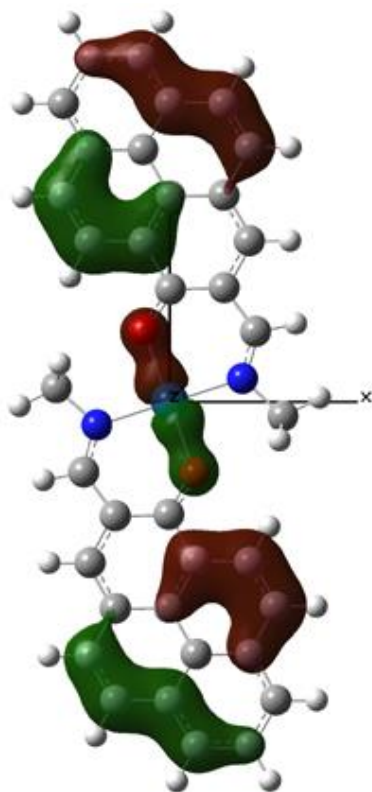

$b_g, \phi_{125}$   
-8.99 eV  
bonding interaction of  $d_{zx}$   
with the ligand

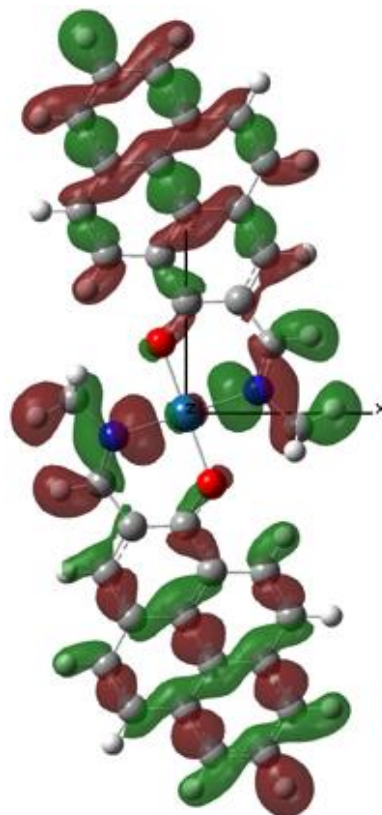

$b_u, \phi_{124}$   
-9.00 eV  
antibonding interaction of  
 $\phi_{xxx}$  of the ligand

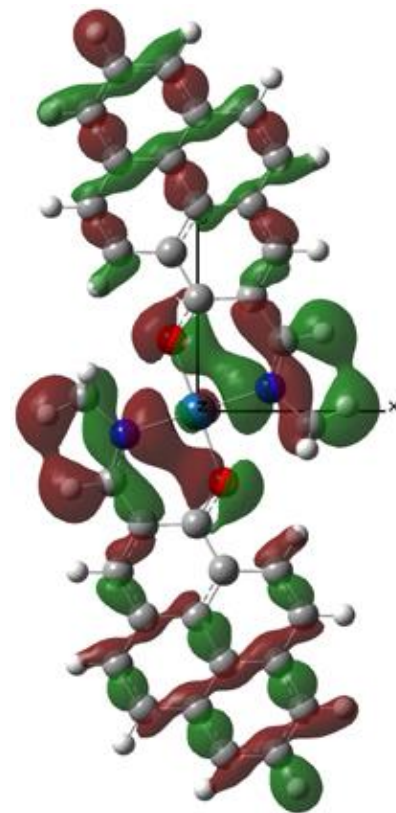

$b_u, \phi_{123}$   
-9.10 eV  
antibonding interaction of  
 $\phi_{xxx}$  of the ligand



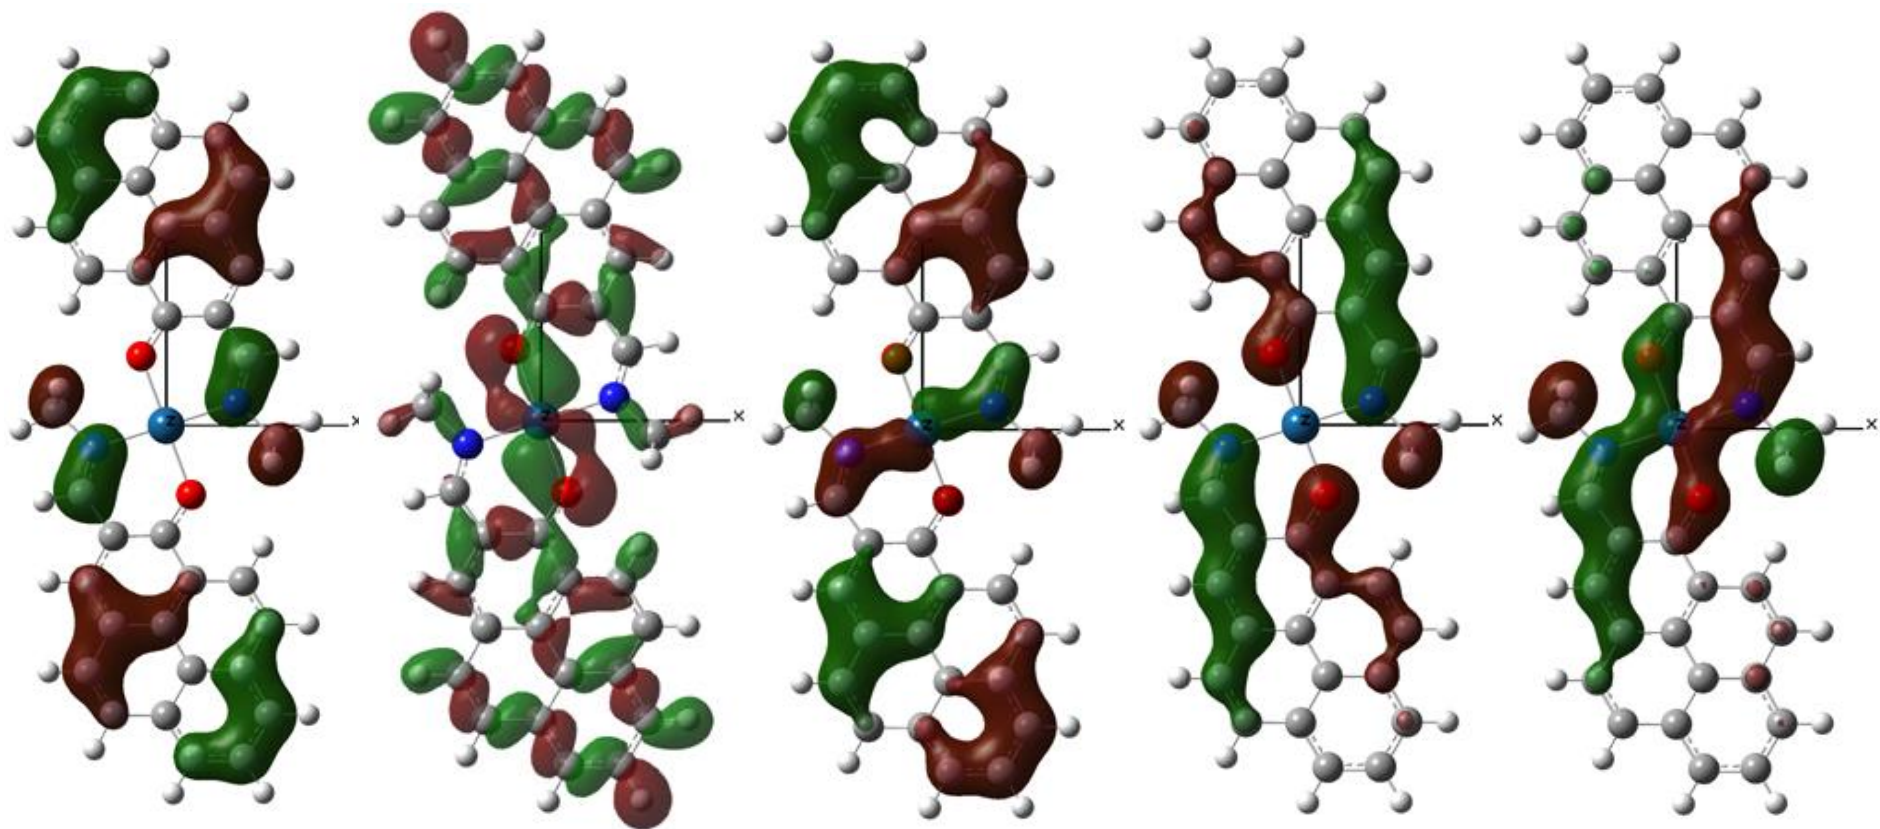

$a_u, \phi_{122}$   
**-9.22 eV**  
 bonding interaction of  
 $\phi_{xxx}$  of the ligand

$a_g, \phi_{121}$   
**-9.35 eV**  
 bonding interaction of  $d_{xy}$   
 with the ligand

$b_g, \phi_{120}$   
**-9.37 eV**  
 bonding interaction of  $d_{yz}$   
 with the ligand

$a_u, \phi_{119}$   
**-9.64 eV**  
 bonding interaction of  
 $\phi_{xxx}$  of the ligand

$b_g, \phi_{118}$   
**-9.75 eV**  
 bonding interaction of  $d_{yz}$   
 with the ligand



# Part-3

## Theoretical<sup>†</sup> Studies of New Pyrene Ligand)

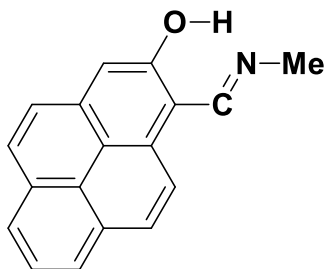

OH-form

Energy: - -823.76078722 HR

Program:  
Method:  
Basis Set:  
Optimized Structure:

Gaussian R-09W Ver.7 + Gauss View Ver.5  
B3LYP  
6-31G(d)



## Bond Distances of the Optimized Structure (Å)

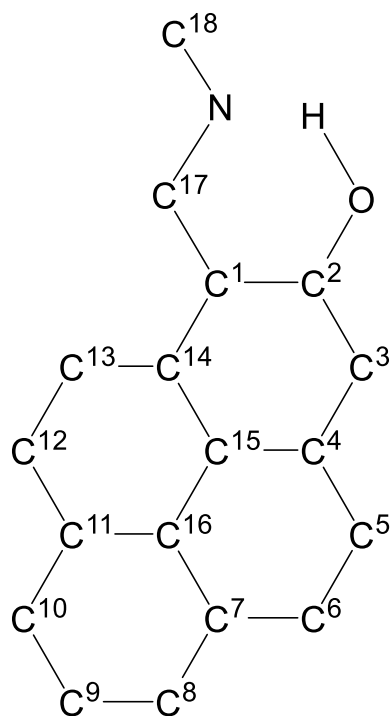

| Bond                            | Theoretical Study <sup>†</sup> | Bond                             | Theoretical Study <sup>†</sup> |
|---------------------------------|--------------------------------|----------------------------------|--------------------------------|
| O-H                             | 1.004                          | C <sup>5</sup> -C <sup>6</sup>   | 1.360                          |
| N...H                           | 1.678                          | C <sup>6</sup> -C <sup>7</sup>   | 1.438                          |
| O-C <sup>2</sup>                | 1.341                          | C <sup>7</sup> -C <sup>8</sup>   | 1.402                          |
| N-C <sup>17</sup>               | 1.288                          | C <sup>7</sup> -C <sup>16</sup>  | 1.430                          |
| N-C <sup>18</sup>               | 1.448                          | C <sup>8</sup> -C <sup>9</sup>   | 1.396                          |
| C <sup>1</sup> -C <sup>2</sup>  | 1.426                          | C <sup>9</sup> -C <sup>10</sup>  | 1.391                          |
| C <sup>1</sup> -C <sup>14</sup> | 1.430                          | C <sup>10</sup> -C <sup>11</sup> | 1.406                          |
| C <sup>2</sup> -C <sup>3</sup>  | 1.398                          | C <sup>11</sup> -C <sup>12</sup> | 1.430                          |
| C <sup>1</sup> -C <sup>17</sup> | 1.456                          | C <sup>11</sup> -C <sup>16</sup> | 1.426                          |
| C <sup>3</sup> -C <sup>4</sup>  | 1.394                          | C <sup>12</sup> -C <sup>13</sup> | 1.364                          |
| C <sup>4</sup> -C <sup>5</sup>  | 1.439                          | C <sup>13</sup> -C <sup>14</sup> | 1.439                          |
| C <sup>4</sup> -C <sup>15</sup> | 1.433                          | C <sup>14</sup> -C <sup>15</sup> | 1.428                          |

<sup>†</sup> C<sup>14</sup>This Work



## Important Bond Angles of the Optimized Structure (Å)

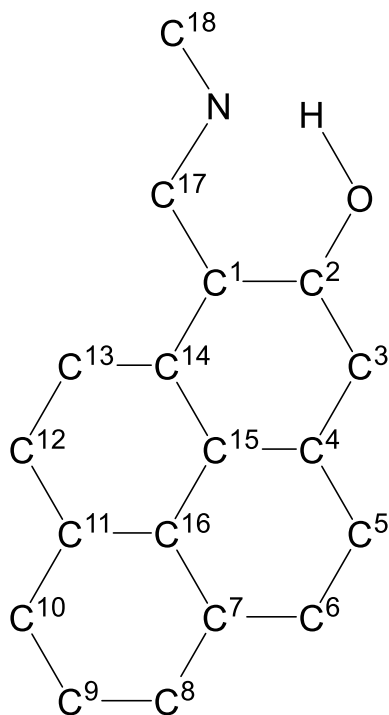

| Angle                                           | Theoretical Study <sup>†</sup> |
|-------------------------------------------------|--------------------------------|
| N-H-O                                           | 148.1                          |
| H-O-C <sup>2</sup>                              | 107.4                          |
| O-C <sup>2</sup> -C <sup>1</sup>                | 122.2                          |
| C <sup>2</sup> -C <sup>1</sup> -C <sup>17</sup> | 119.2                          |
| C <sup>1</sup> -C <sup>17</sup> -N              | 122.9                          |
| C <sup>17</sup> -N-H                            | 100.2                          |

<sup>†</sup> This Work



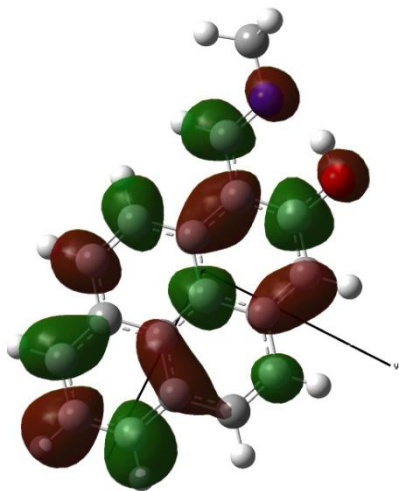

$a'' (= \pi), \phi_{74},$   
+2.04 eV

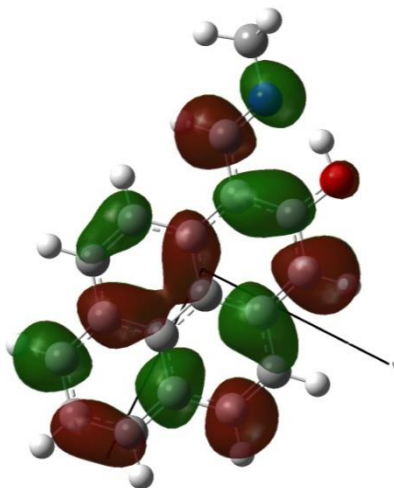

$a'' (= \pi), \phi_{73}$   
0.97 eV

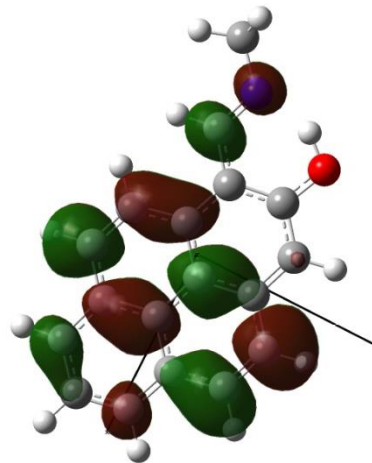

$a'' (= \pi), \phi_{72}$   
-0.01 eV

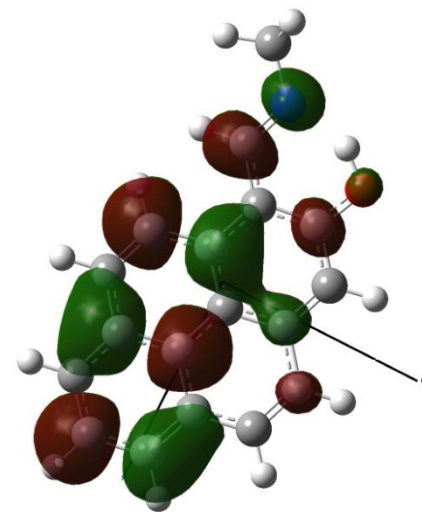

$a'' (= \pi), \phi_{71}$   
-0.39 eV

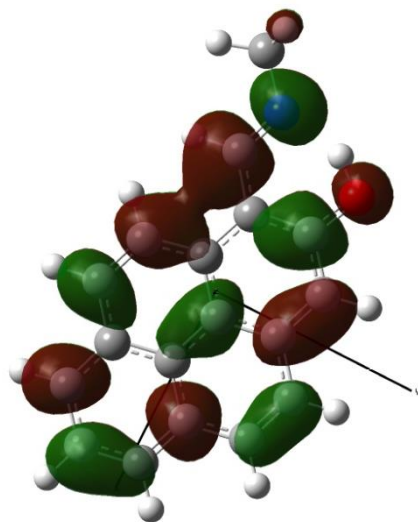

$a'' (= \pi), \phi_{70},$   
-0.58 eV  
LUMO+1

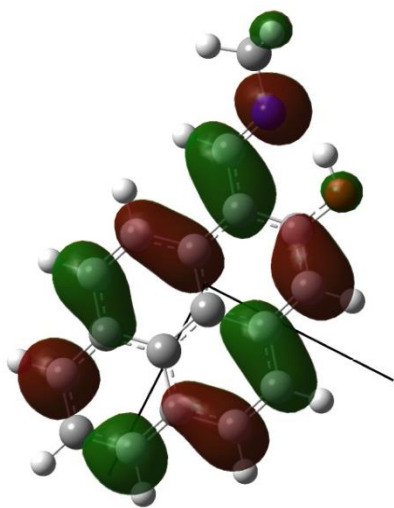

$a'' (= \pi), \phi_{69}$   
-1.94 eV  
LUMO

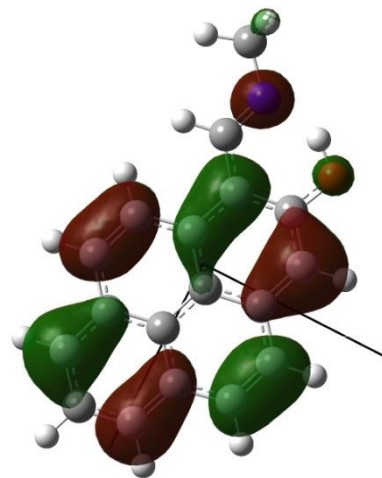

$a'' (= \pi), \phi_{68}$   
-5.41 eV  
HOMO

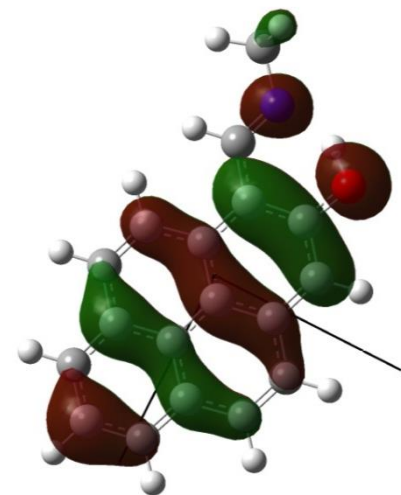

$a'' (= \pi), \phi_{67}$   
-5.67 eV  
HOMO-1



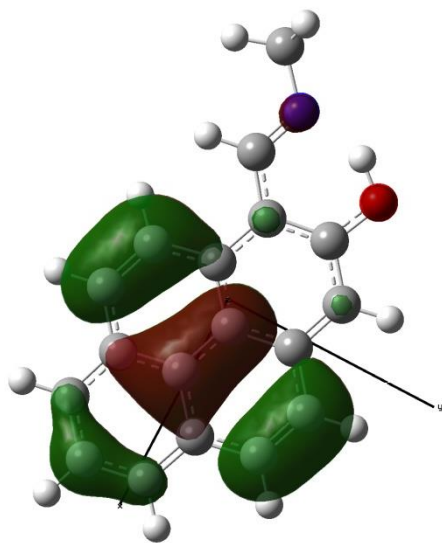

$a'' (= \pi), \phi_{66}$   
-6.92 eV

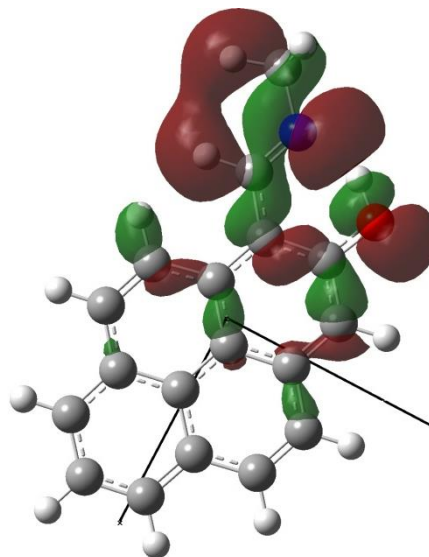

$a'' (= \sigma), \phi_{65}$   
-7.22 eV

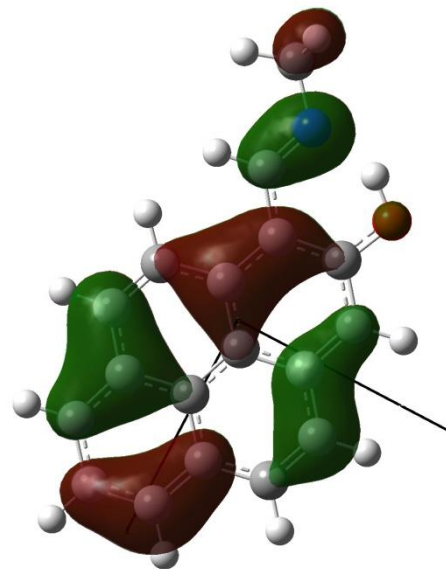

$a' (= \pi), \phi_{64}$   
-7.30 eV

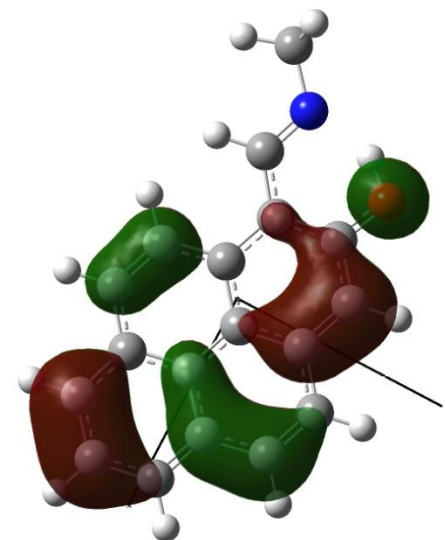

$a'' (= \pi), \phi_{63}$   
-7.45 eV

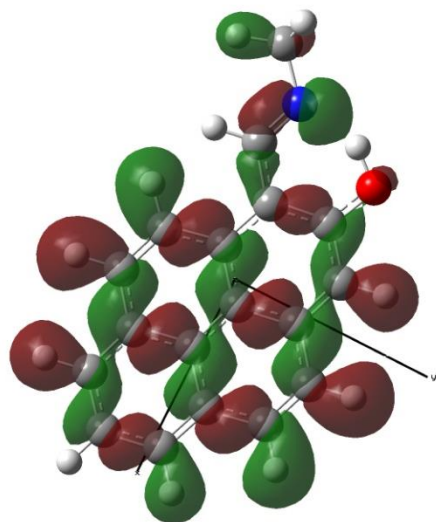

$a' (= \sigma), \phi_{62}$   
-8.75 eV

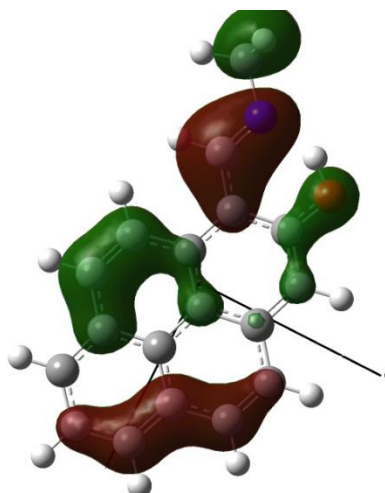

$a'' (= \pi), \phi_{61}$   
-8.80 eV

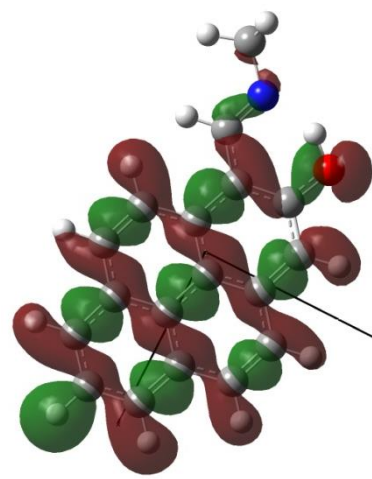

$a' (= \pi), \phi_{60}$   
-9.11 eV

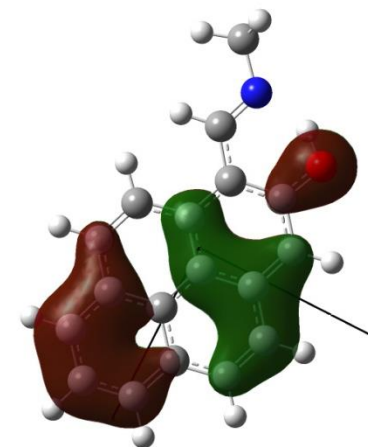

$a'' (= \pi), \phi_{59}^{27}$   
-9.30 eV



# Part-2

## Theoretical<sup>†</sup> Studies of **1** (Pyrene Ligand)

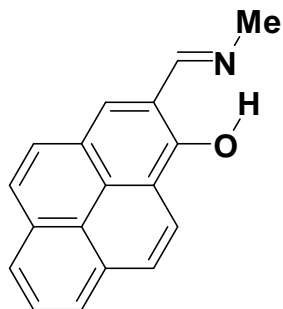

OH-form

Energy: -823.76512992 HR

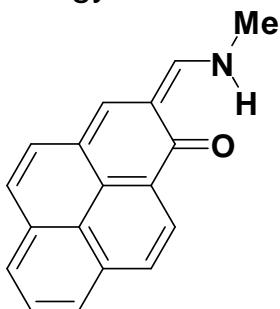

NH-form

Energy: -823.76177316 HR

Program:  
Method:  
Basis Set:  
Optimized Structure:

Gaussian R-09W Ver.7 + Gauss View Ver.5  
B3LYP  
6-31G(d)  
C<sub>s</sub>

Comment #1:

For this ligand, two forms are possible, *i.e.*, OH-form and NH-form. Theoretical studies on these two forms suggest that OH-form is more stable than NH-form, about 2.11 kcal mol<sup>-1</sup>. This *Supporting Information* only describes the structure and properties of OH-form.



# Bond Distances of the Optimized Structure (Å)

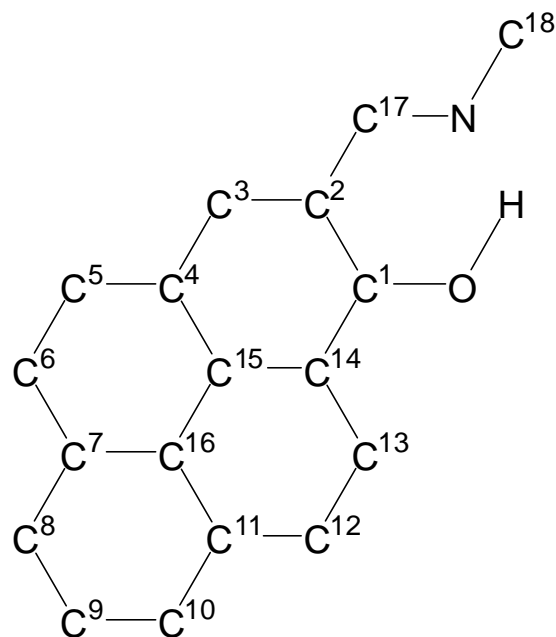

| Bond                            | Theoretical Study <sup>†</sup> | Bond                             | Theoretical Study <sup>†</sup> |
|---------------------------------|--------------------------------|----------------------------------|--------------------------------|
| O-H                             | 1.003                          | C <sup>5</sup> -C <sup>6</sup>   | 1.360                          |
| N...H                           | 1.718                          | C <sup>6</sup> -C <sup>7</sup>   | 1.440                          |
| O-C <sup>1</sup>                | 1.341                          | C <sup>7</sup> -C <sup>8</sup>   | 1.403                          |
| N-C <sup>17</sup>               | 1.284                          | C <sup>7</sup> -C <sup>16</sup>  | 1.430                          |
| N-C <sup>18</sup>               | 1.448                          | C <sup>8</sup> -C <sup>9</sup>   | 1.396                          |
| C <sup>1</sup> -C <sup>2</sup>  | 1.421                          | C <sup>9</sup> -C <sup>10</sup>  | 1.392                          |
| C <sup>1</sup> -C <sup>14</sup> | 1.416                          | C <sup>10</sup> -C <sup>11</sup> | 1.406                          |
| C <sup>2</sup> -C <sup>3</sup>  | 1.403                          | C <sup>11</sup> -C <sup>12</sup> | 1.436                          |
| C <sup>2</sup> -C <sup>17</sup> | 1.457                          | C <sup>11</sup> -C <sup>16</sup> | 1.429                          |
| C <sup>3</sup> -C <sup>4</sup>  | 1.395                          | C <sup>12</sup> -C <sup>13</sup> | 1.363                          |
| C <sup>4</sup> -C <sup>5</sup>  | 1.438                          | C <sup>13</sup> -C <sup>14</sup> | 1.434                          |
| C <sup>4</sup> -C <sup>15</sup> | 1.433                          | C <sup>14</sup> -C <sup>15</sup> | 1.423                          |

†

††

This Work

This Work



## Important Bond Angles of the Optimized Structure (Å)

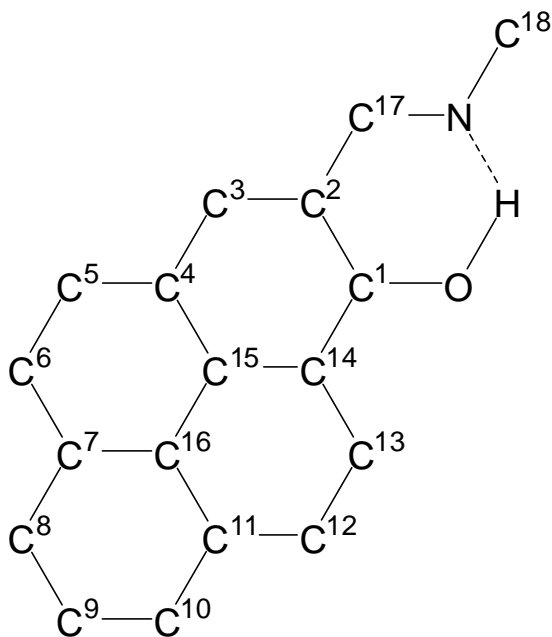

| Angle                                           | Theoretical Study <sup>†</sup> |
|-------------------------------------------------|--------------------------------|
| N-H-O                                           | 148.15                         |
| H-O-C <sup>1</sup>                              | 107.30                         |
| O-C <sup>1</sup> -C <sup>2</sup>                | 121.59                         |
| C <sup>1</sup> -C <sup>2</sup> -C <sup>17</sup> | 120.89                         |
| C <sup>2</sup> -C <sup>17</sup> -N              | 122.79                         |
| C <sup>17</sup> -N-H                            | 99.27                          |



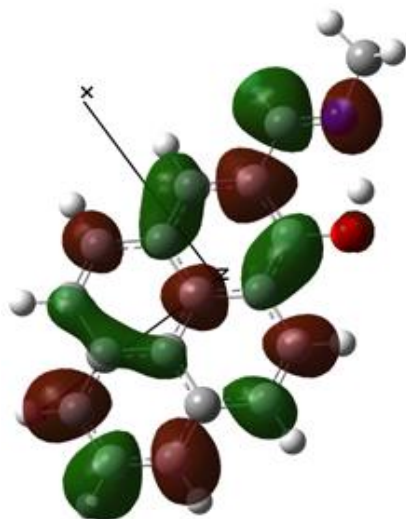

$a'' (= \pi), \phi_{74},$   
+2.28 eV

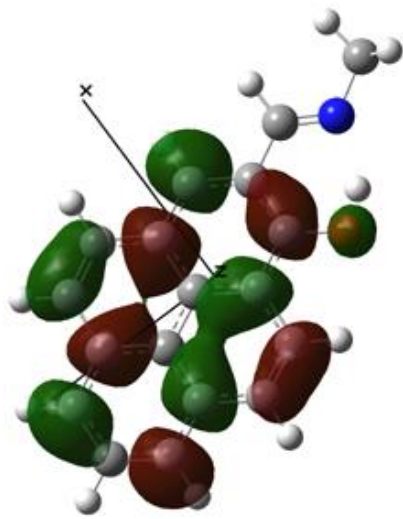

$a'' (= \pi), \phi_{73}$   
0.73 eV

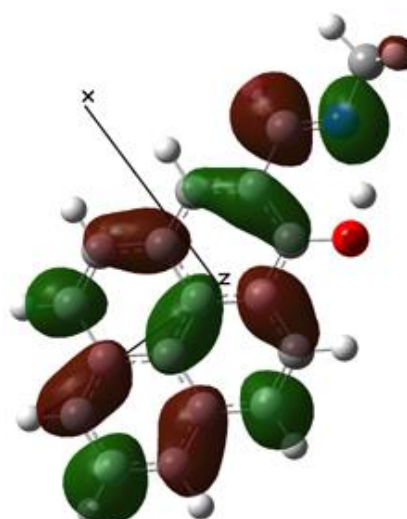

$a'' (= \pi), \phi_{72}$   
0.29 eV

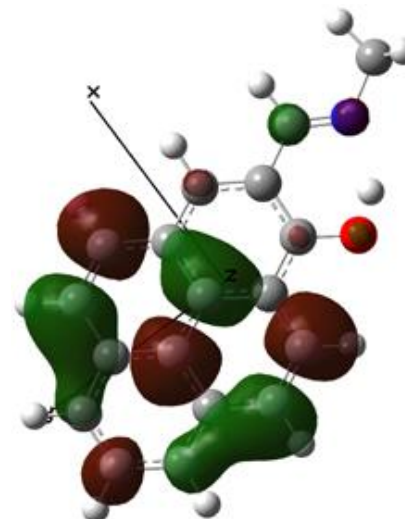

$a'' (= \pi), \phi_{71}$   
0.02 eV

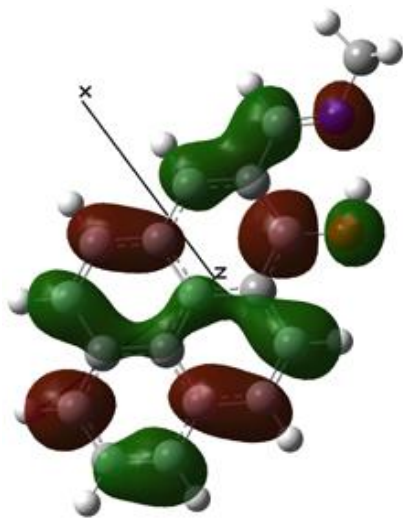

$a'' (= \pi), \phi_{70},$   
-1.24 eV  
LUMO+1

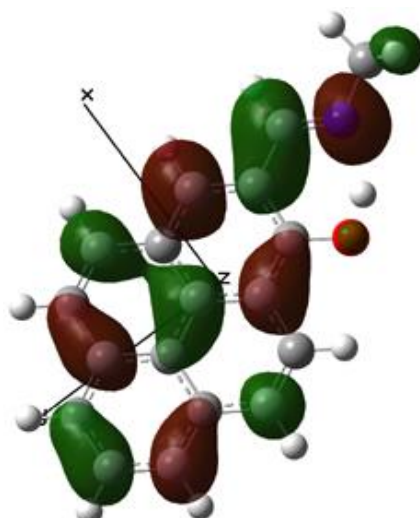

$a'' (= \pi), \phi_{69}$   
-1.50 eV  
LUMO

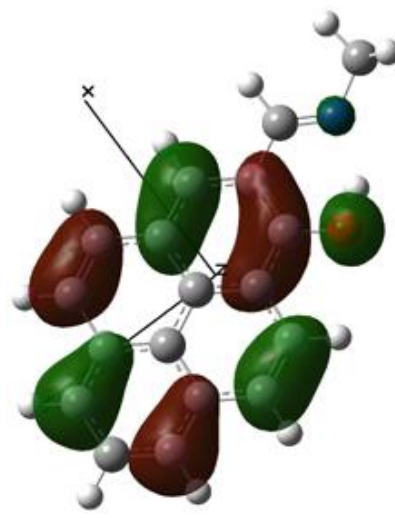

$a'' (= \pi), \phi_{68}$   
-4.99 eV  
HOMO

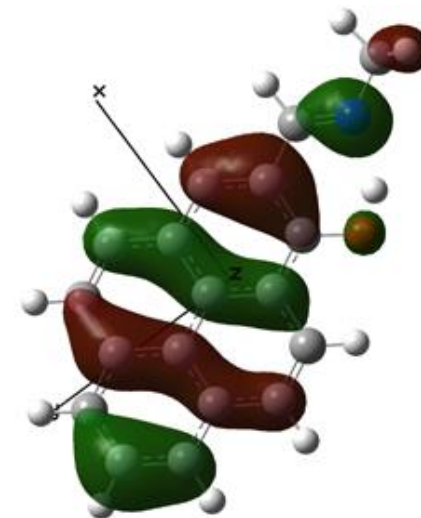

$a'' (= \pi), \phi_{67}$   
-6.13 eV  
HOMO-1



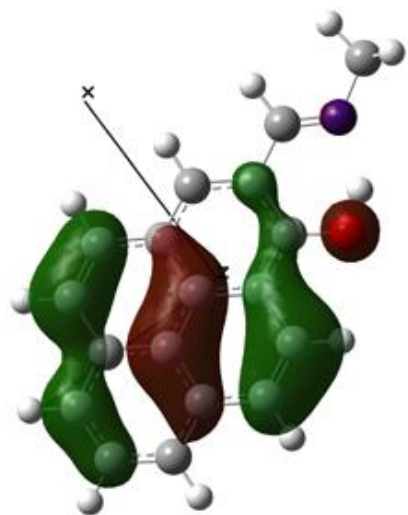

$a'' (= \pi), \phi_{66}$   
-6.75 eV

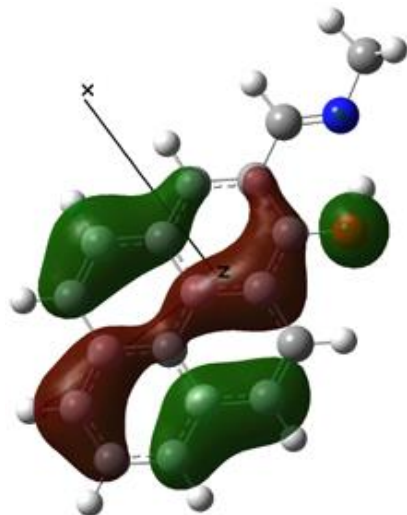

$a'' (= \pi), \phi_{65}$   
-6.98 eV

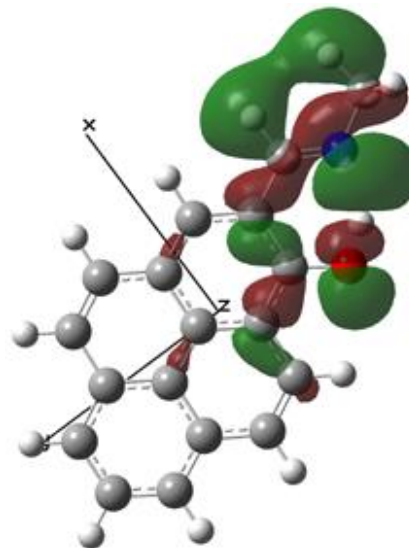

$a' (= \sigma), \phi_{64}$   
-7.41 eV

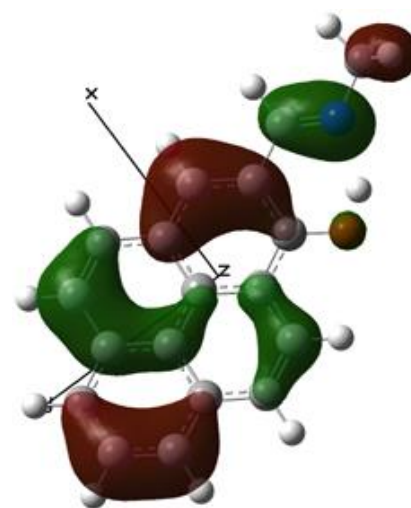

$a'' (= \pi), \phi_{63}$   
-7.63 eV

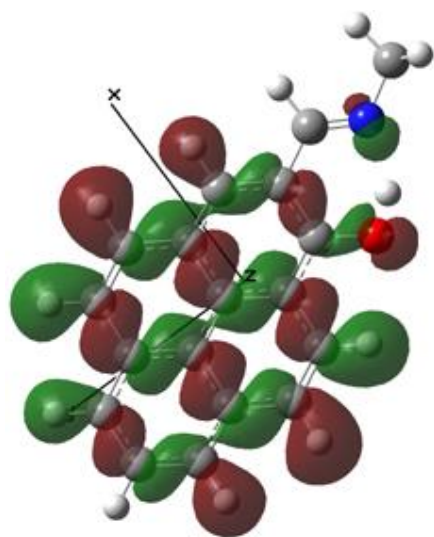

$a' (= \sigma), \phi_{62}$   
-8.61 eV

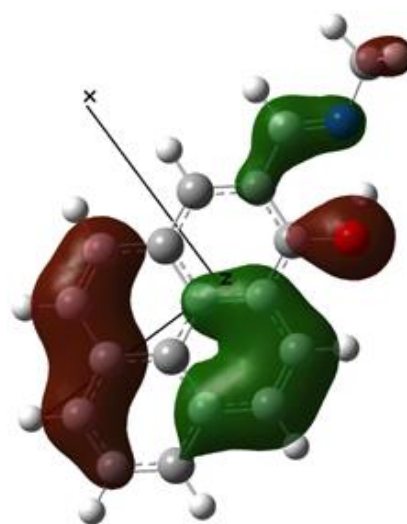

$a'' (= \pi), \phi_{61}$   
-8.86 eV

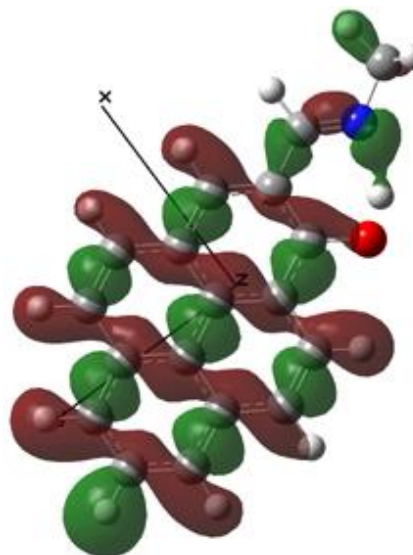

$a' (= \sigma), \phi_{60}$   
-8.98 eV

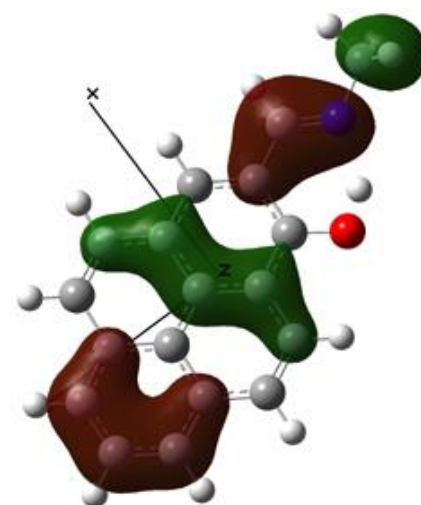

$a'' (= \pi), \phi_{59}$   
-9.06 eV



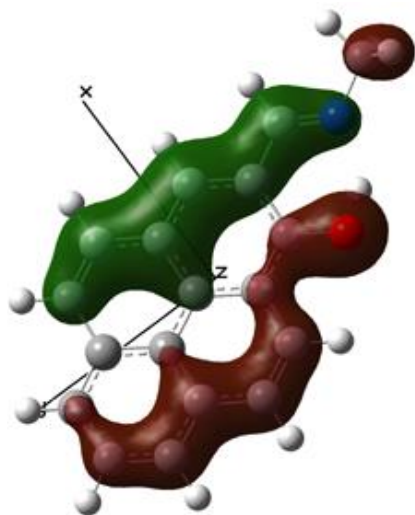

$a'' (= \pi), \phi_{58}$   
-9.50 eV

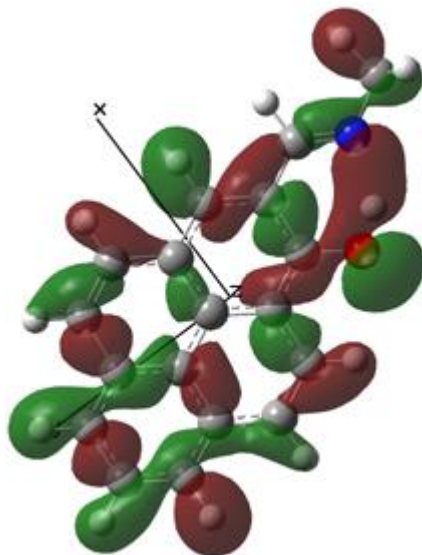

$a' (= \sigma), \phi_{57}$   
-9.68 eV

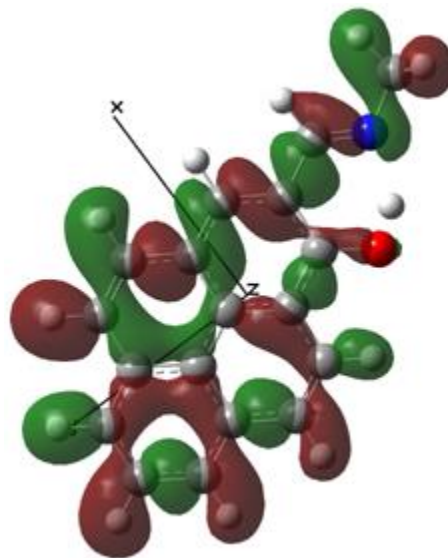

$a' (= \sigma), \phi_{56}$   
-10.05 eV

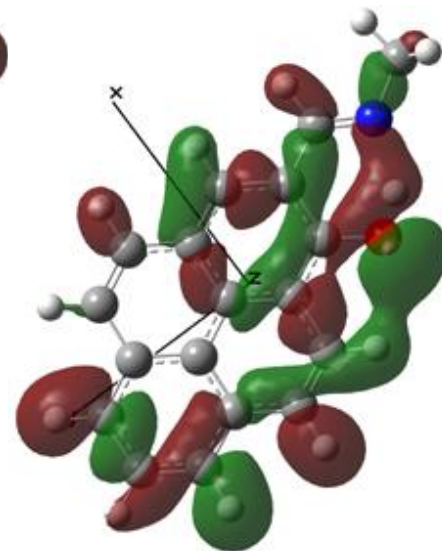

$a' (= \sigma), \phi_{55}$   
-10.41 eV



# Part-6

## Comparison of Kohn-Sham Orbital Energies



# Kohn-Sham Frontier Orbital Energies of **2** and **4**

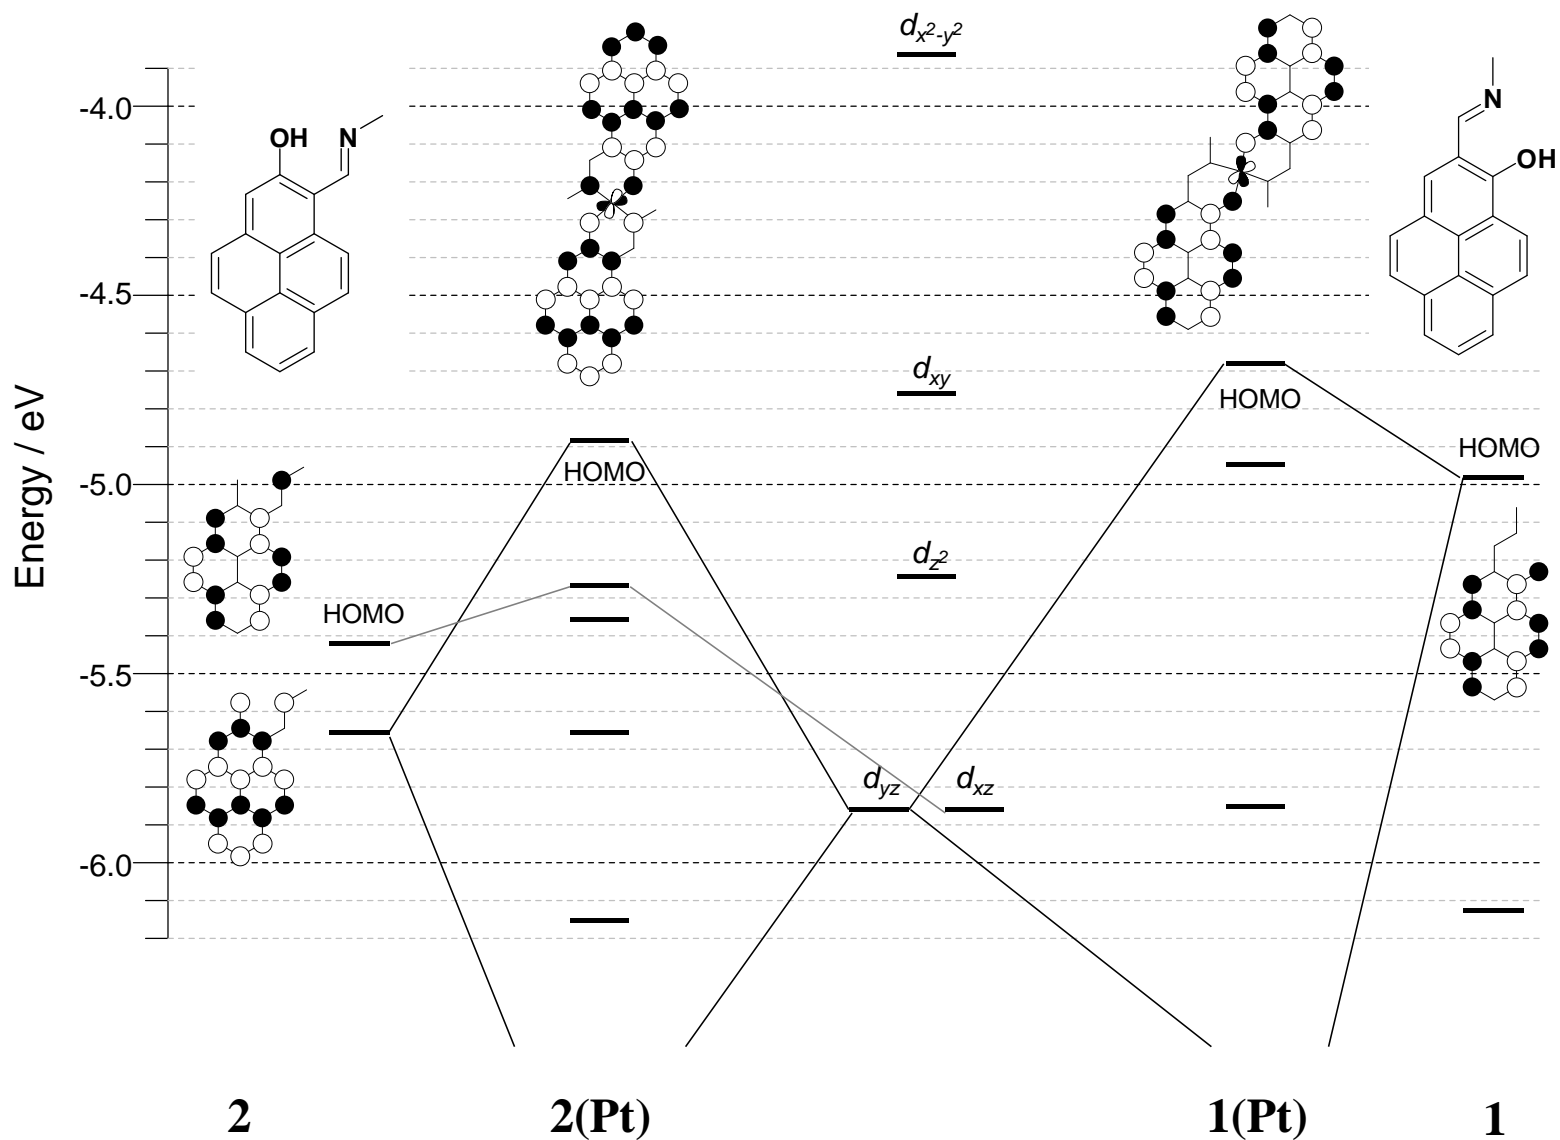

Supplement: s1 [file s1]
