# Supplementary material
Source: MDPI journal article supplement (https://www.mdpi.com/2073-4352/10/6/476)

# Electronic Supplementary Information #1

## Spectroscopic Studies

Title: Metal Complexes of  $\pi$ -Expanded Ligands (7): Syntheses, Structures and Properties of Pt(II) Complexes Containing Isomeric 1- and 2-alkyliminomethyl Pyrene Ligands.

Authors: Luong Xuan Dien<sup>1,2\*</sup>, Nguyen Xuan Truong<sup>1</sup>

Organization: <sup>1</sup> *School of Chemical Engineering, Hanoi University of Science and Technology, 1 Dai Co Viet, Hanoi, Vietnam*  
<sup>2</sup> *Department of Chemistry, Graduate School of Science and Engineering, Tokyo Metropolitan University, 1-1 Minami-Ohsawa, Hachi-Oji, Tokyo 192-0397, Japan*

# Comparison of IR Spectra of Ligands and Complexes

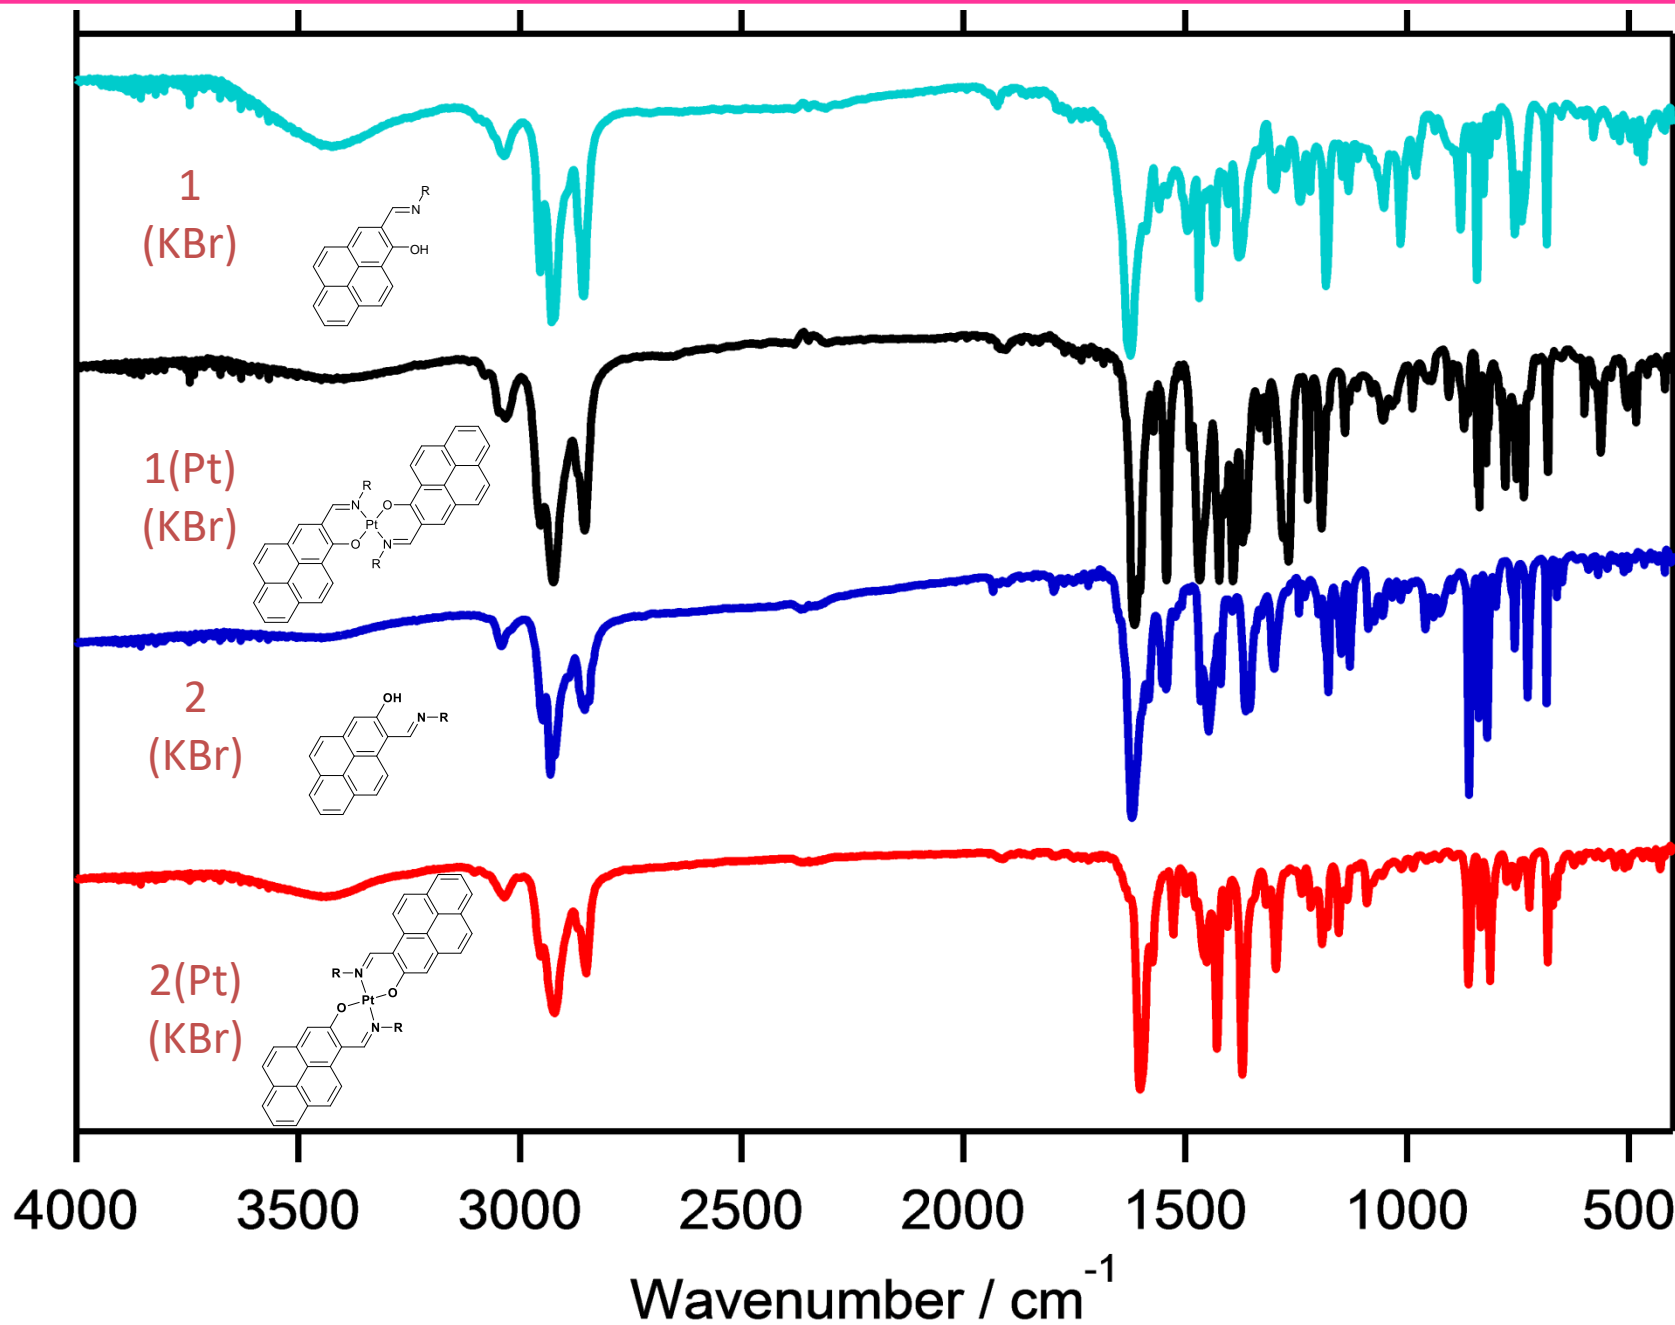

## Expanded Plots of IR Spectra

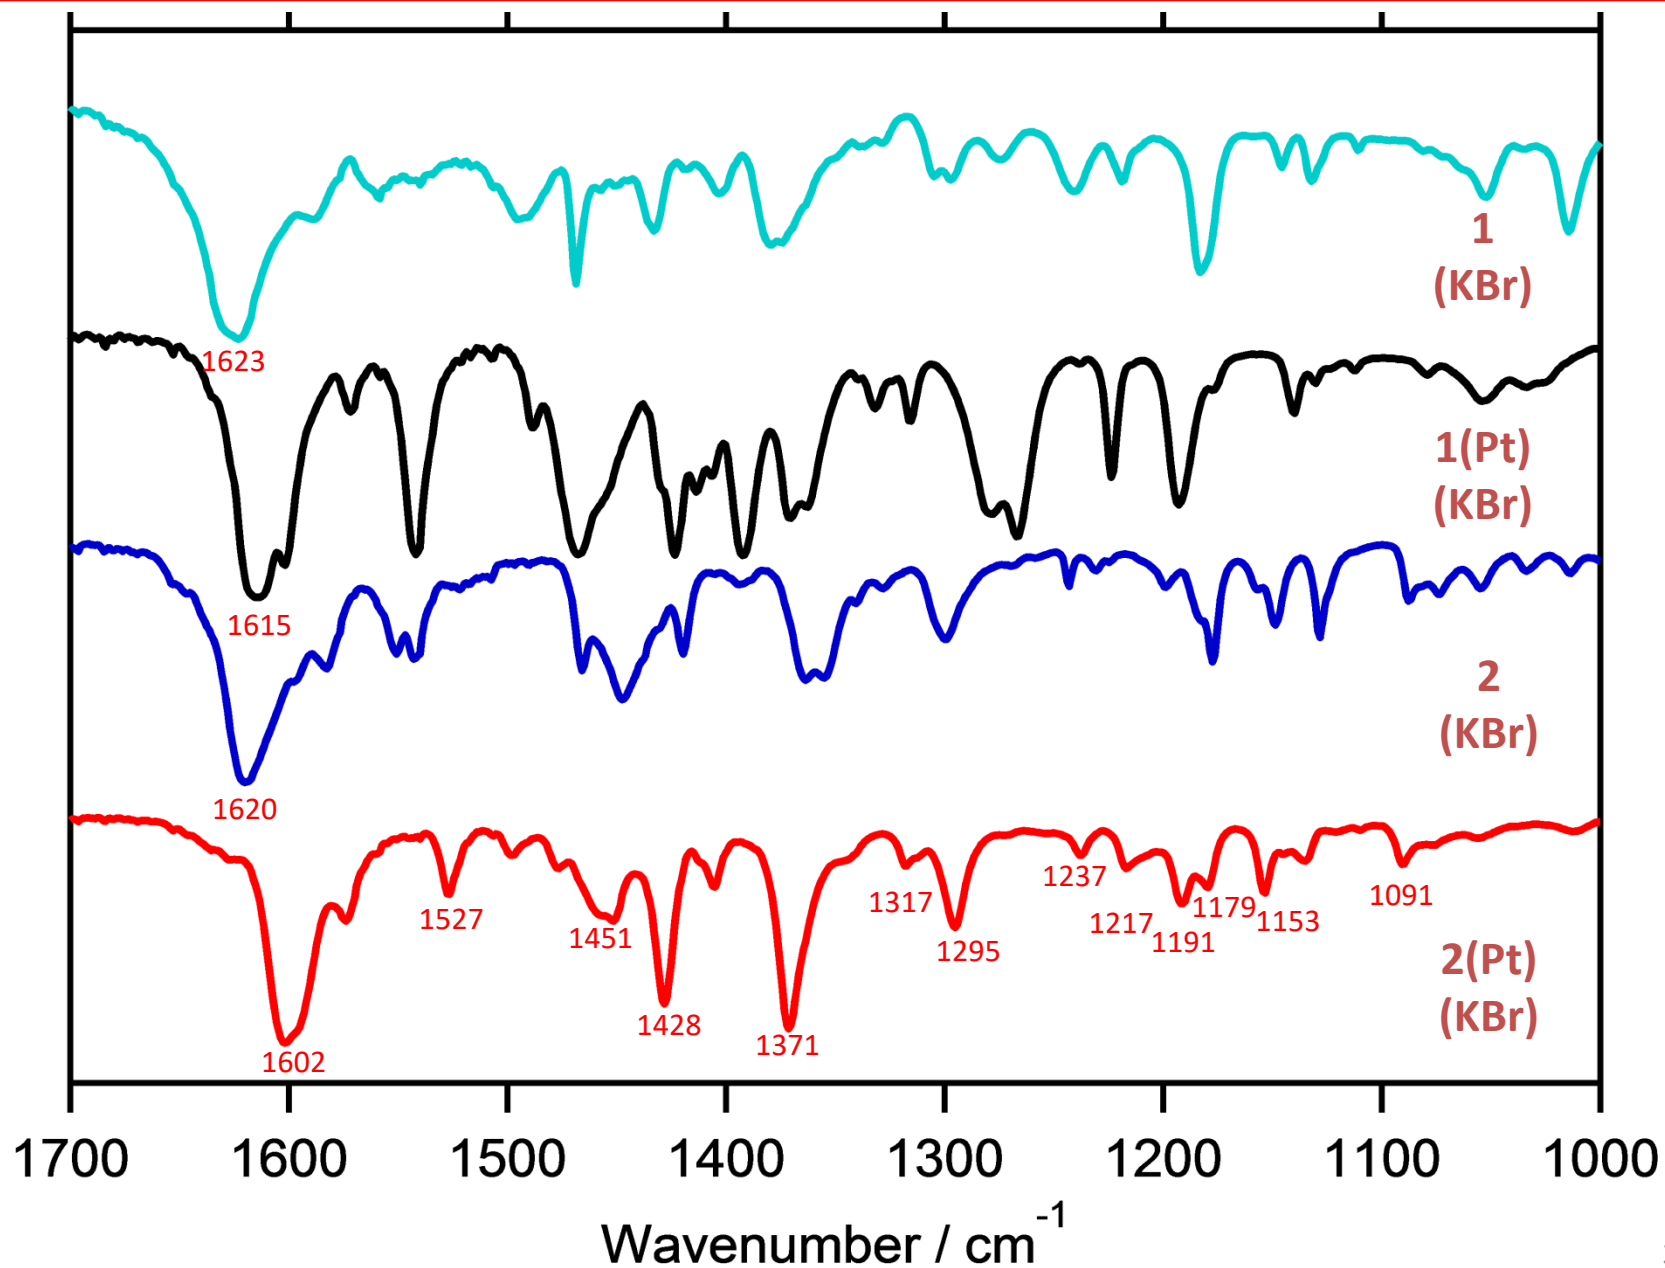

## Expanded Plots of IR Spectra

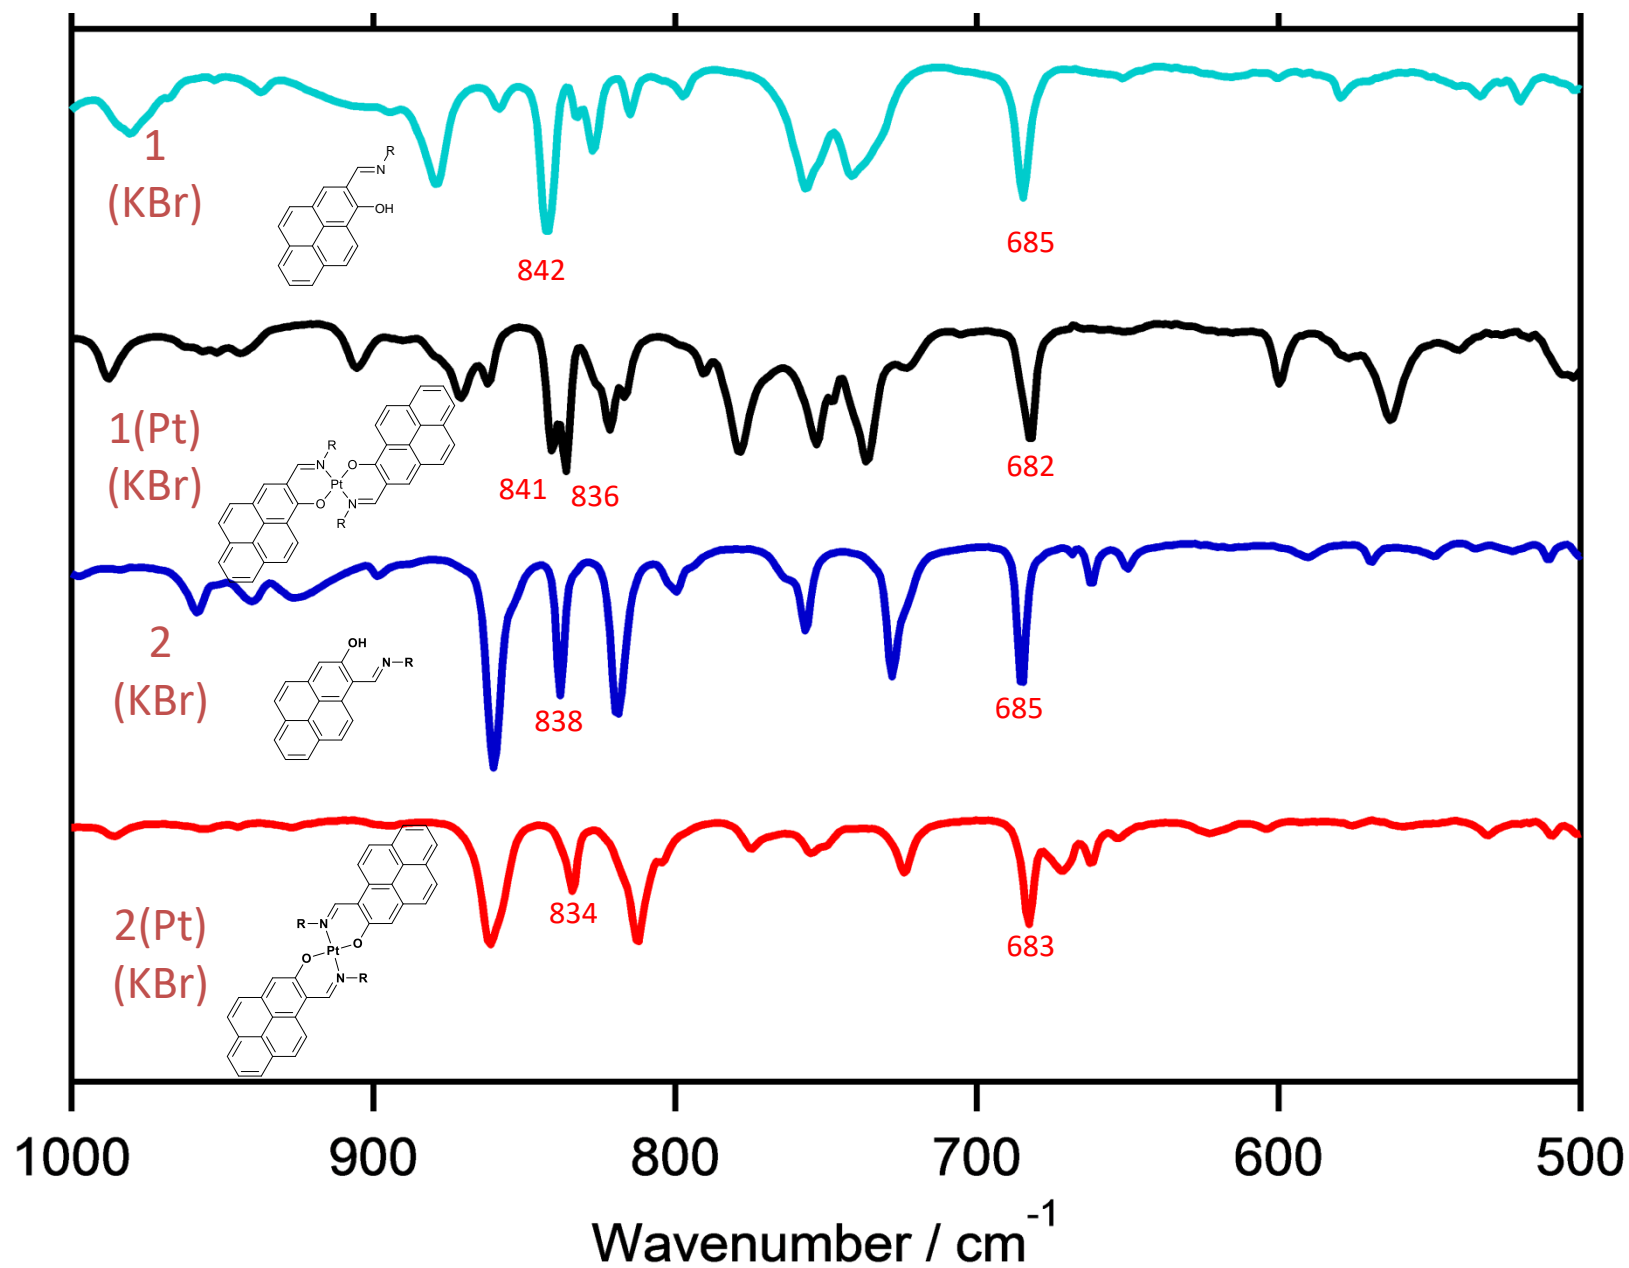

# Compound 9

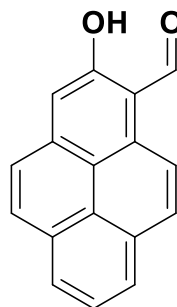

This important intermediate, 2-hydroxypyrene-1-carbaldehyde **9**, was prepared according to a different way compared to the literature: P. Demerseman, J. Einhorn, J. F. Gourvest and R. Royer, *J. Org. Chem.*, 1988, 53(17), 3936.

|                   |                             |
|-------------------|-----------------------------|
| Yield:            | 95%                         |
| mp:               | 180 °C (from ethyl acetate) |
| Chemical Formula: | $C_{17}H_{10}O_2$           |
| Molecular Weight: | 246.27                      |

# NMR Spectrum (CDCl<sub>3</sub>)

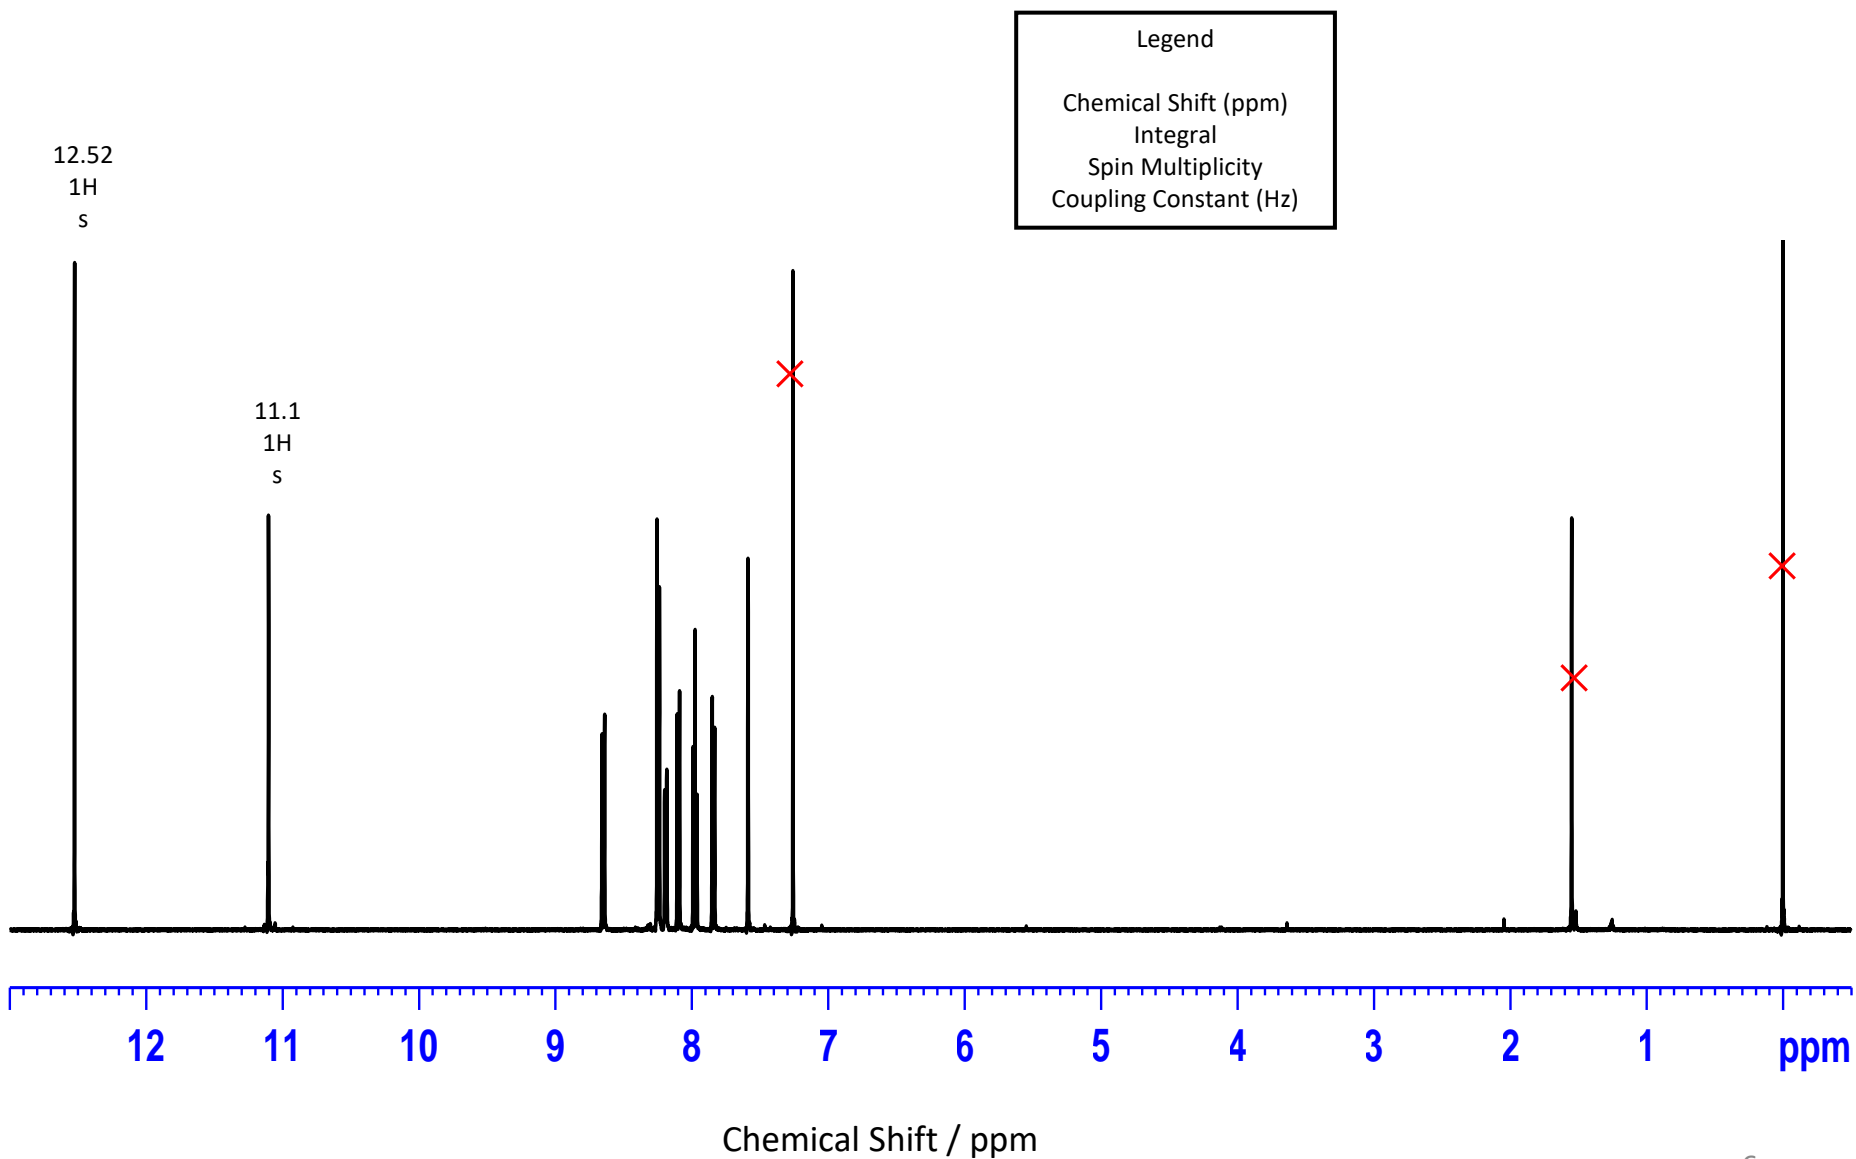

# NMR Spectrum: Expanded Plot (CDCl<sub>3</sub>)

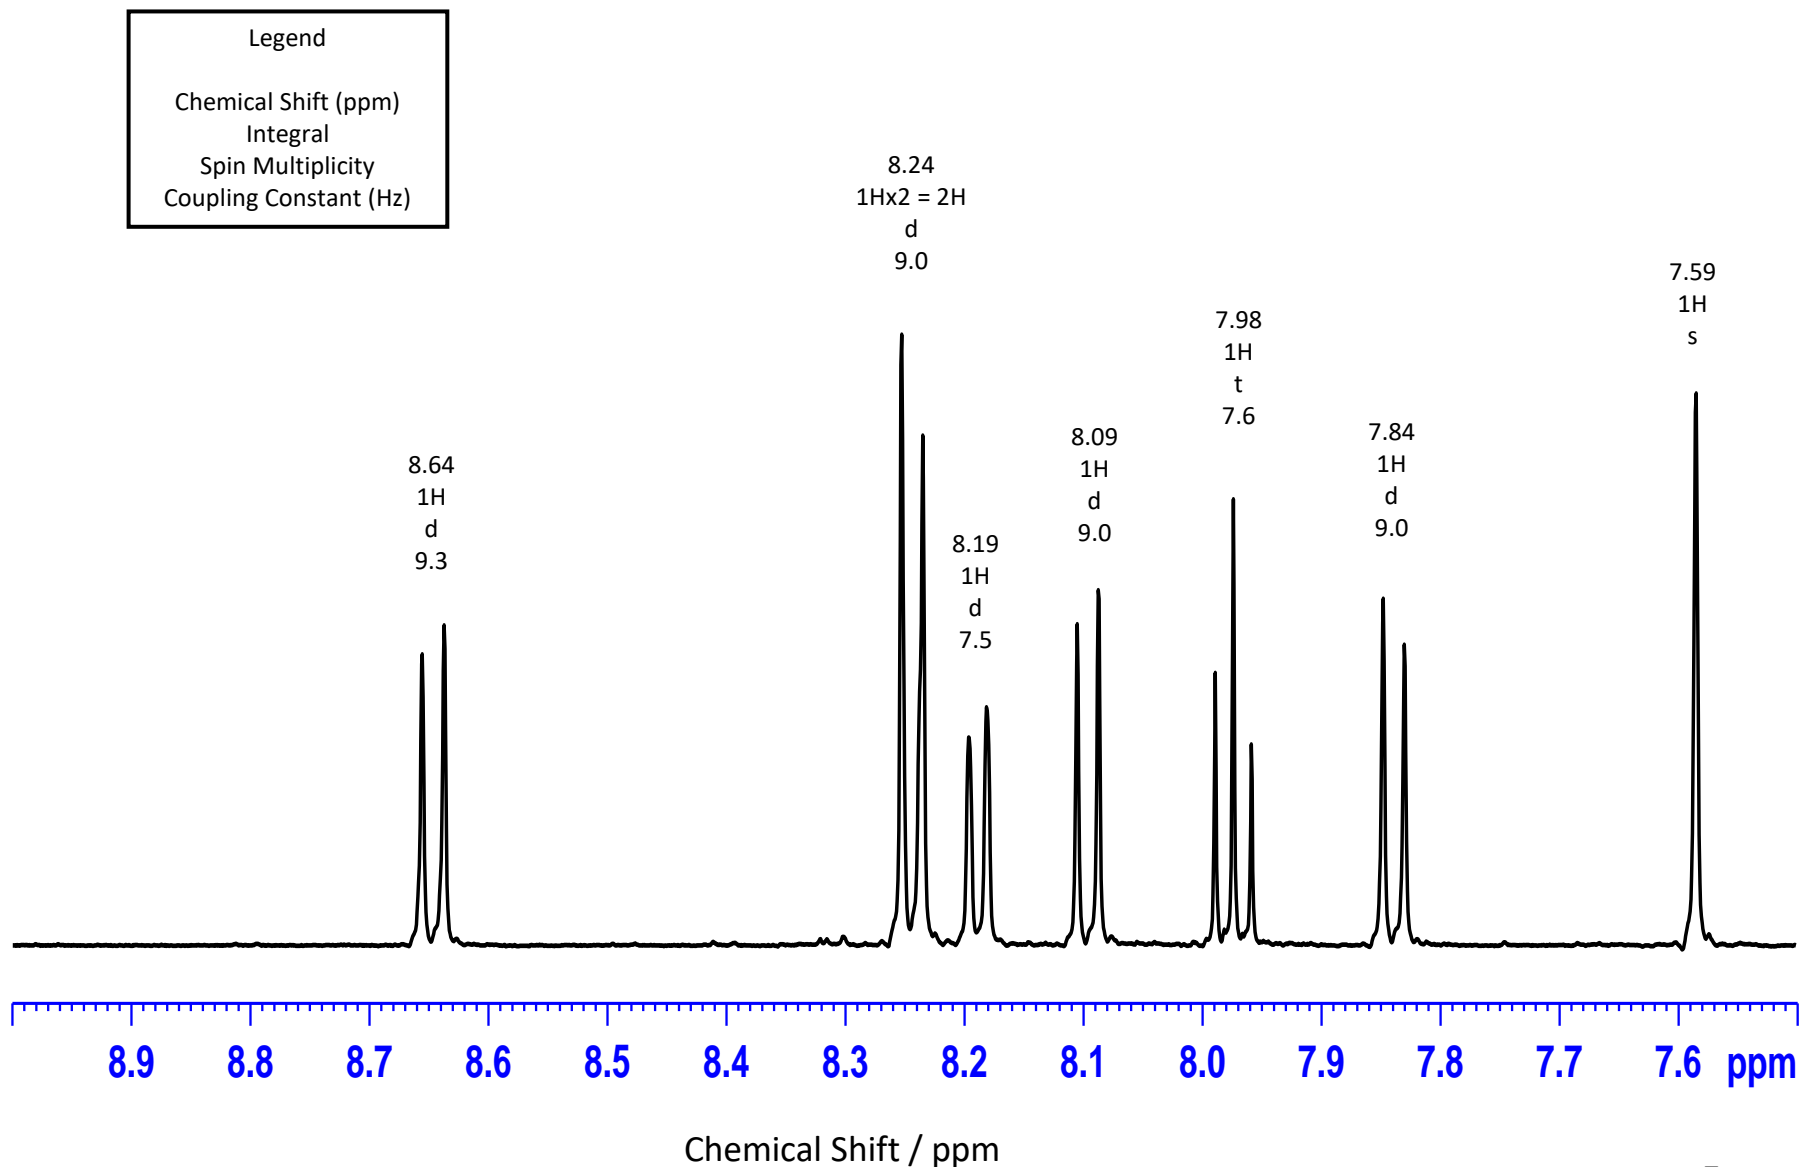

# Compound 2

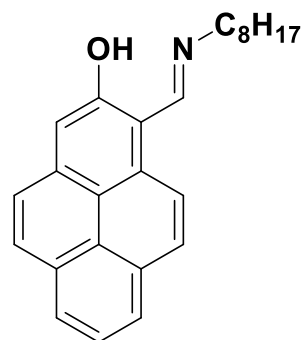

|                   |                                    |
|-------------------|------------------------------------|
| Yield:            | 99%                                |
| mp:               | 88 °C (from hexane)                |
| Chemical Formula: | C <sub>25</sub> H <sub>27</sub> NO |
| Molecular Weight: | 357.49                             |



# Elemental Analysis

## Request & Report Sheet of Elemental Analysis

Date(month/day): / /

|                                                                                                                |                                                                                  |                                                                                                                |                |
|----------------------------------------------------------------------------------------------------------------|----------------------------------------------------------------------------------|----------------------------------------------------------------------------------------------------------------|----------------|
| Department Name: <i>Chemistry</i>                                                                              |                                                                                  | Approval from Teaching Staff: <i>LT</i>                                                                        |                |
| Lab. Name: <i>Inorganic Chemistry</i>                                                                          |                                                                                  |                                                                                                                |                |
| Your Name: <i>LUONG XUAN DIEN</i>                                                                              |                                                                                  |                                                                                                                |                |
| Your Position: <input type="checkbox"/> Staff <input checked="" type="checkbox"/> Student (grade: <i>PhD</i> ) |                                                                                  | Your access extension#: <i>3567</i>                                                                            |                |
| Your E-mail: <i>dienvx306@gmail.com</i>                                                                        |                                                                                  |                                                                                                                |                |
| Sample Name(Symbolic): <i>DL171</i>                                                                            |                                                                                  |                                                                                                                |                |
| Molecular Formula: <i>C<sub>25</sub>H<sub>27</sub>NO</i>                                                       |                                                                                  | Molecular Weight: <i>357.50</i>                                                                                |                |
| property                                                                                                       | mp : °C                                                                          | Structural Formula:<br><br>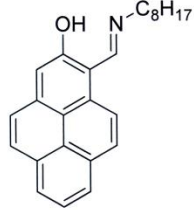 |                |
|                                                                                                                | bp : °C                                                                          |                                                                                                                |                |
|                                                                                                                | Decompose point °C                                                               |                                                                                                                |                |
|                                                                                                                | State: <input type="checkbox"/> Liquid <input checked="" type="checkbox"/> solid |                                                                                                                |                |
|                                                                                                                | <input type="checkbox"/> hygroscopic <input type="checkbox"/> poisonous          |                                                                                                                |                |
|                                                                                                                | <input type="checkbox"/> sublimate or volatile                                   |                                                                                                                |                |
| <input type="checkbox"/> photodegradability                                                                    |                                                                                  |                                                                                                                |                |
| <input type="checkbox"/> handling in Ar atmosphere                                                             |                                                                                  |                                                                                                                |                |
| Sample Wt.                                                                                                     | <i>6.26</i>                                                                      | mg                                                                                                             |                |
| Comment & request for measuring:<br>(Ex. <input type="checkbox"/> Double time measuring, etc.)                 |                                                                                  |                                                                                                                |                |
| Theoretical cont. (Wt.%)                                                                                       | C: <i>83.99</i>                                                                  | H: <i>7.61</i>                                                                                                 | N: <i>3.92</i> |
|                                                                                                                | O: <i>4.48</i>                                                                   |                                                                                                                |                |

calcd. for  
*C<sub>25</sub>H<sub>27</sub>NO*

found

### Result of (Single time) Measurement

| Measured cont. (Wt.%) | C: <i>83.80</i>  | H: <i>7.61</i>   | N: <i>3.93</i>  |  | Used Sample Wt. (mg) |
|-----------------------|------------------|------------------|-----------------|--|----------------------|
| K-factor              | C: <i>22.797</i> | H: <i>63.672</i> | N: <i>7.888</i> |  | <i>1.398</i>         |

Measuring Date (month/day): *4/1/6* (Counter#: *8204*)  Report No: *17*

# NMR Spectrum (CDCl<sub>3</sub>)

## Legend

Chemical Shift (ppm)  
Integral  
Spin Multiplicity  
Coupling Constant (Hz)

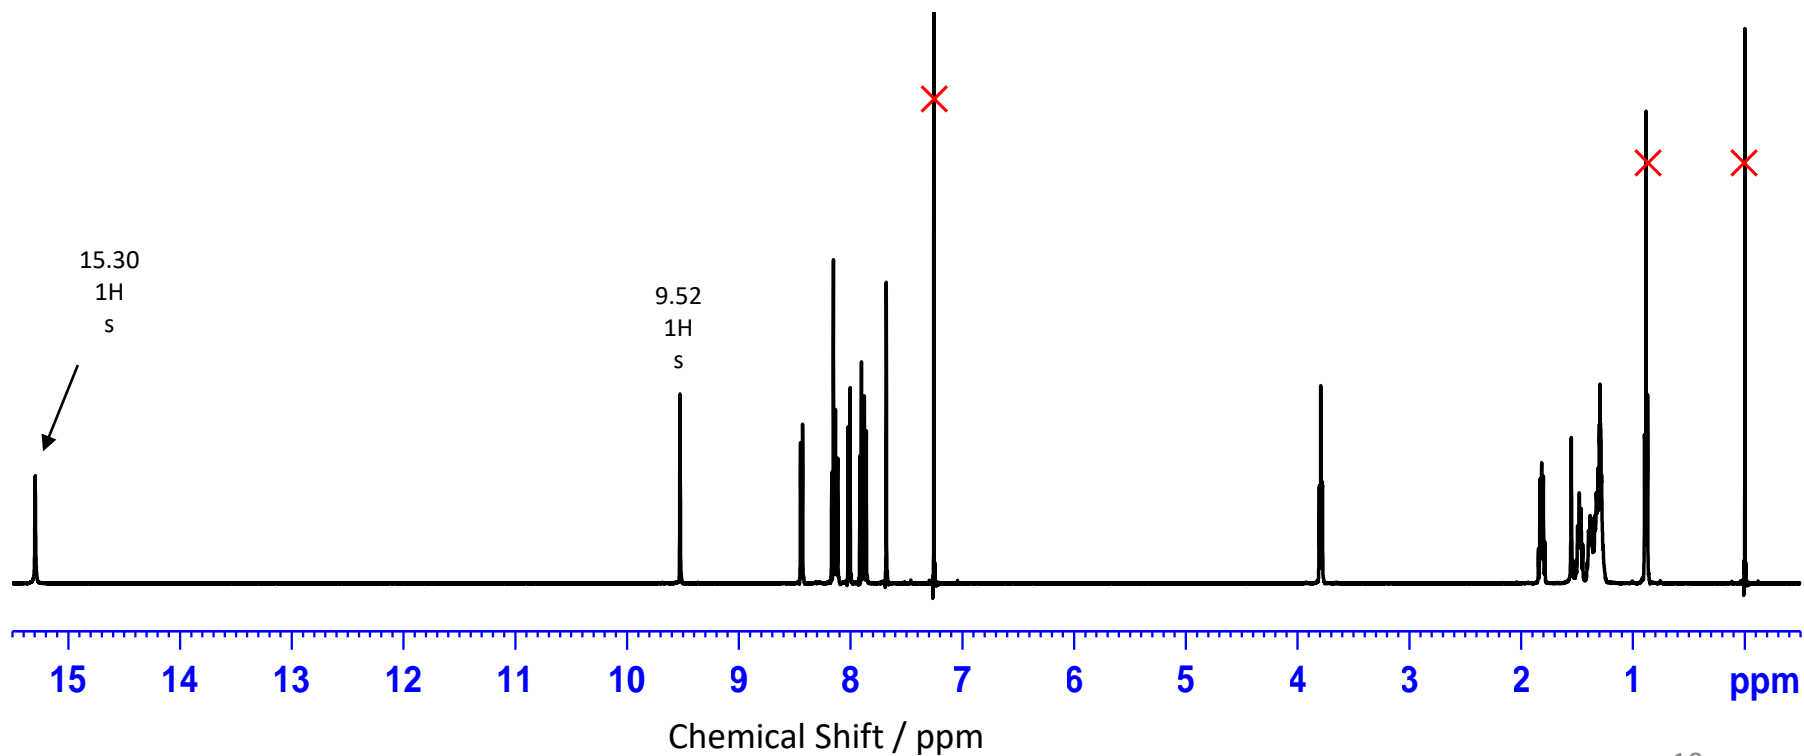

# NMR Spectrum: Expanded Plot ( $\text{CDCl}_3$ )

| Legend               |          |                   |                        |
|----------------------|----------|-------------------|------------------------|
| Chemical Shift (ppm) | Integral | Spin Multiplicity | Coupling Constant (Hz) |

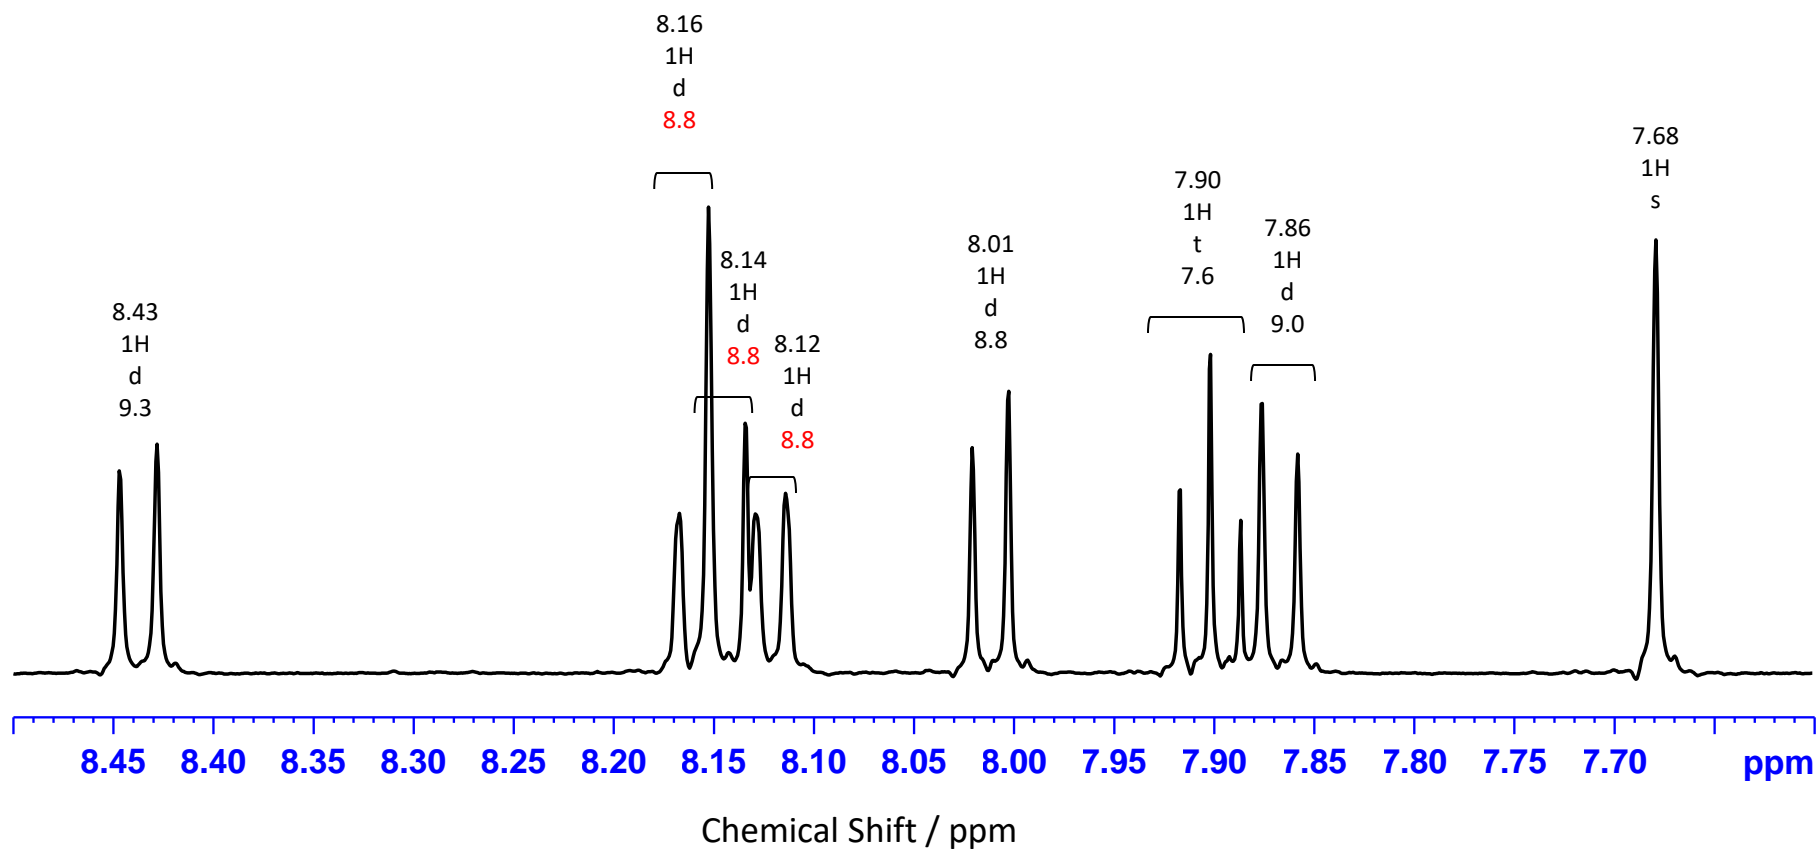

# NMR Spectrum: Expanded Plot ( $\text{CDCl}_3$ )

| Legend                 |  |
|------------------------|--|
| Chemical Shift (ppm)   |  |
| Integral               |  |
| Spin Multiplicity      |  |
| Coupling Constant (Hz) |  |

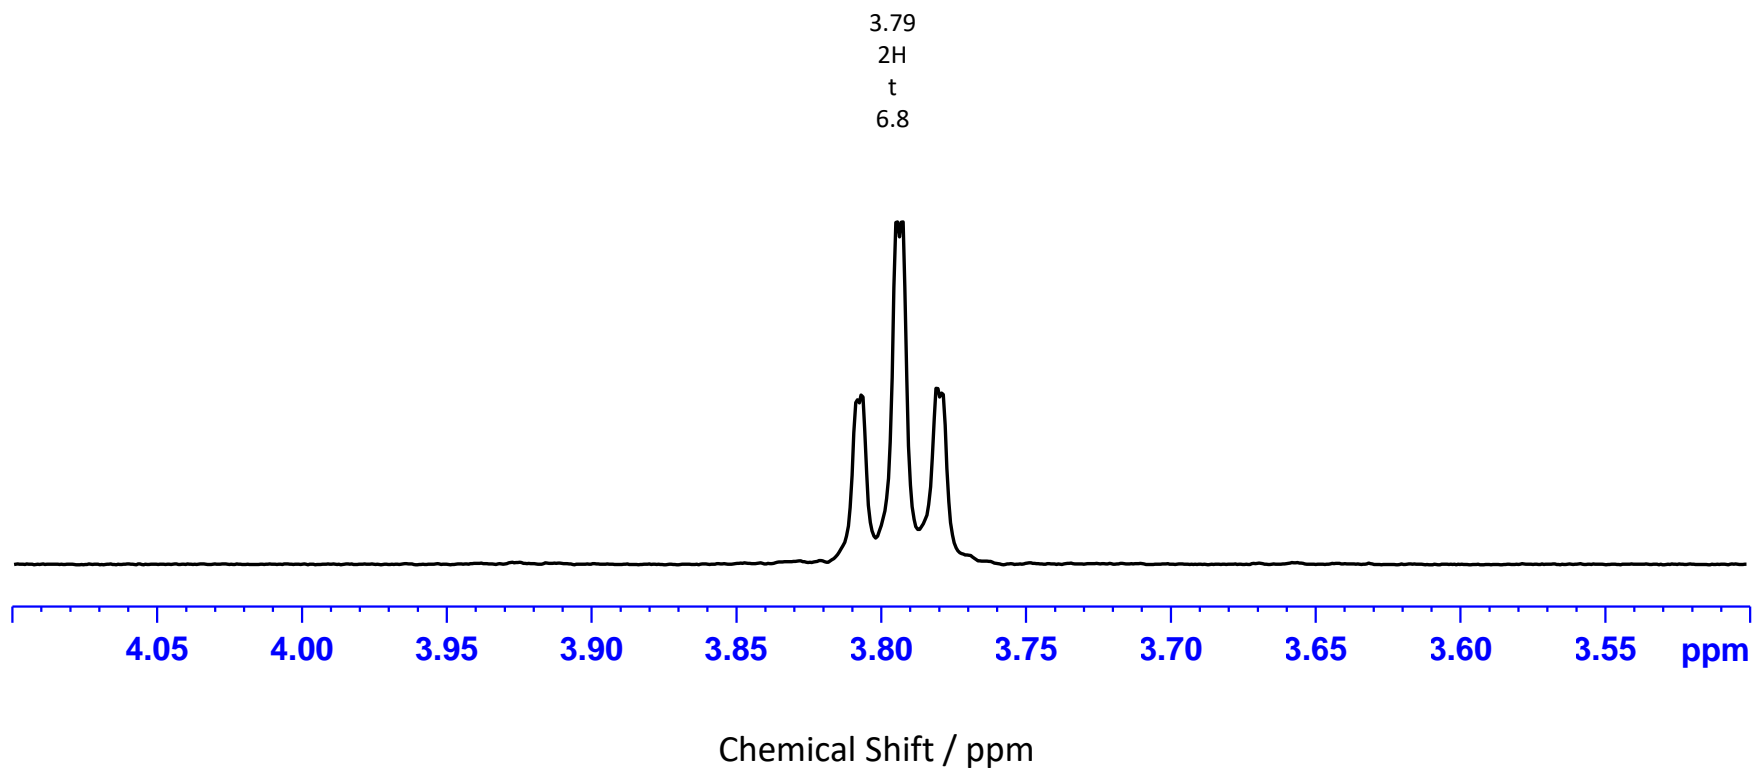

# NMR Spectrum: Expanded Plot ( $\text{CDCl}_3$ )

| Legend                 |  |
|------------------------|--|
| Chemical Shift (ppm)   |  |
| Integral               |  |
| Spin Multiplicity      |  |
| Coupling Constant (Hz) |  |

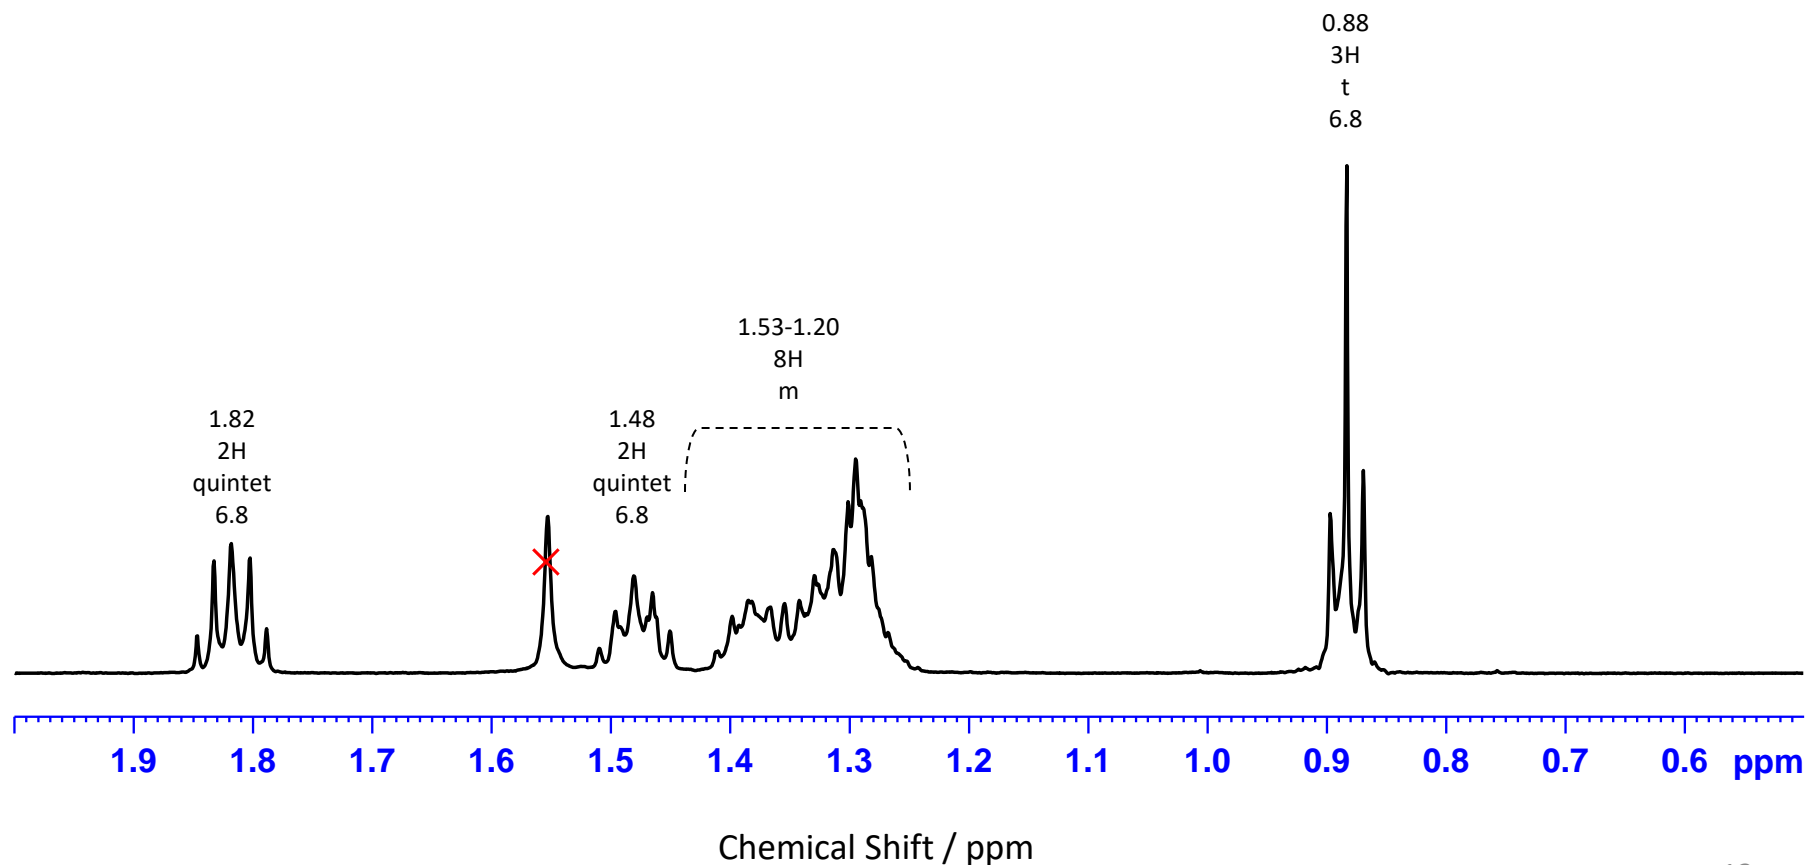

# IR Spectrum (KBr Pellet)

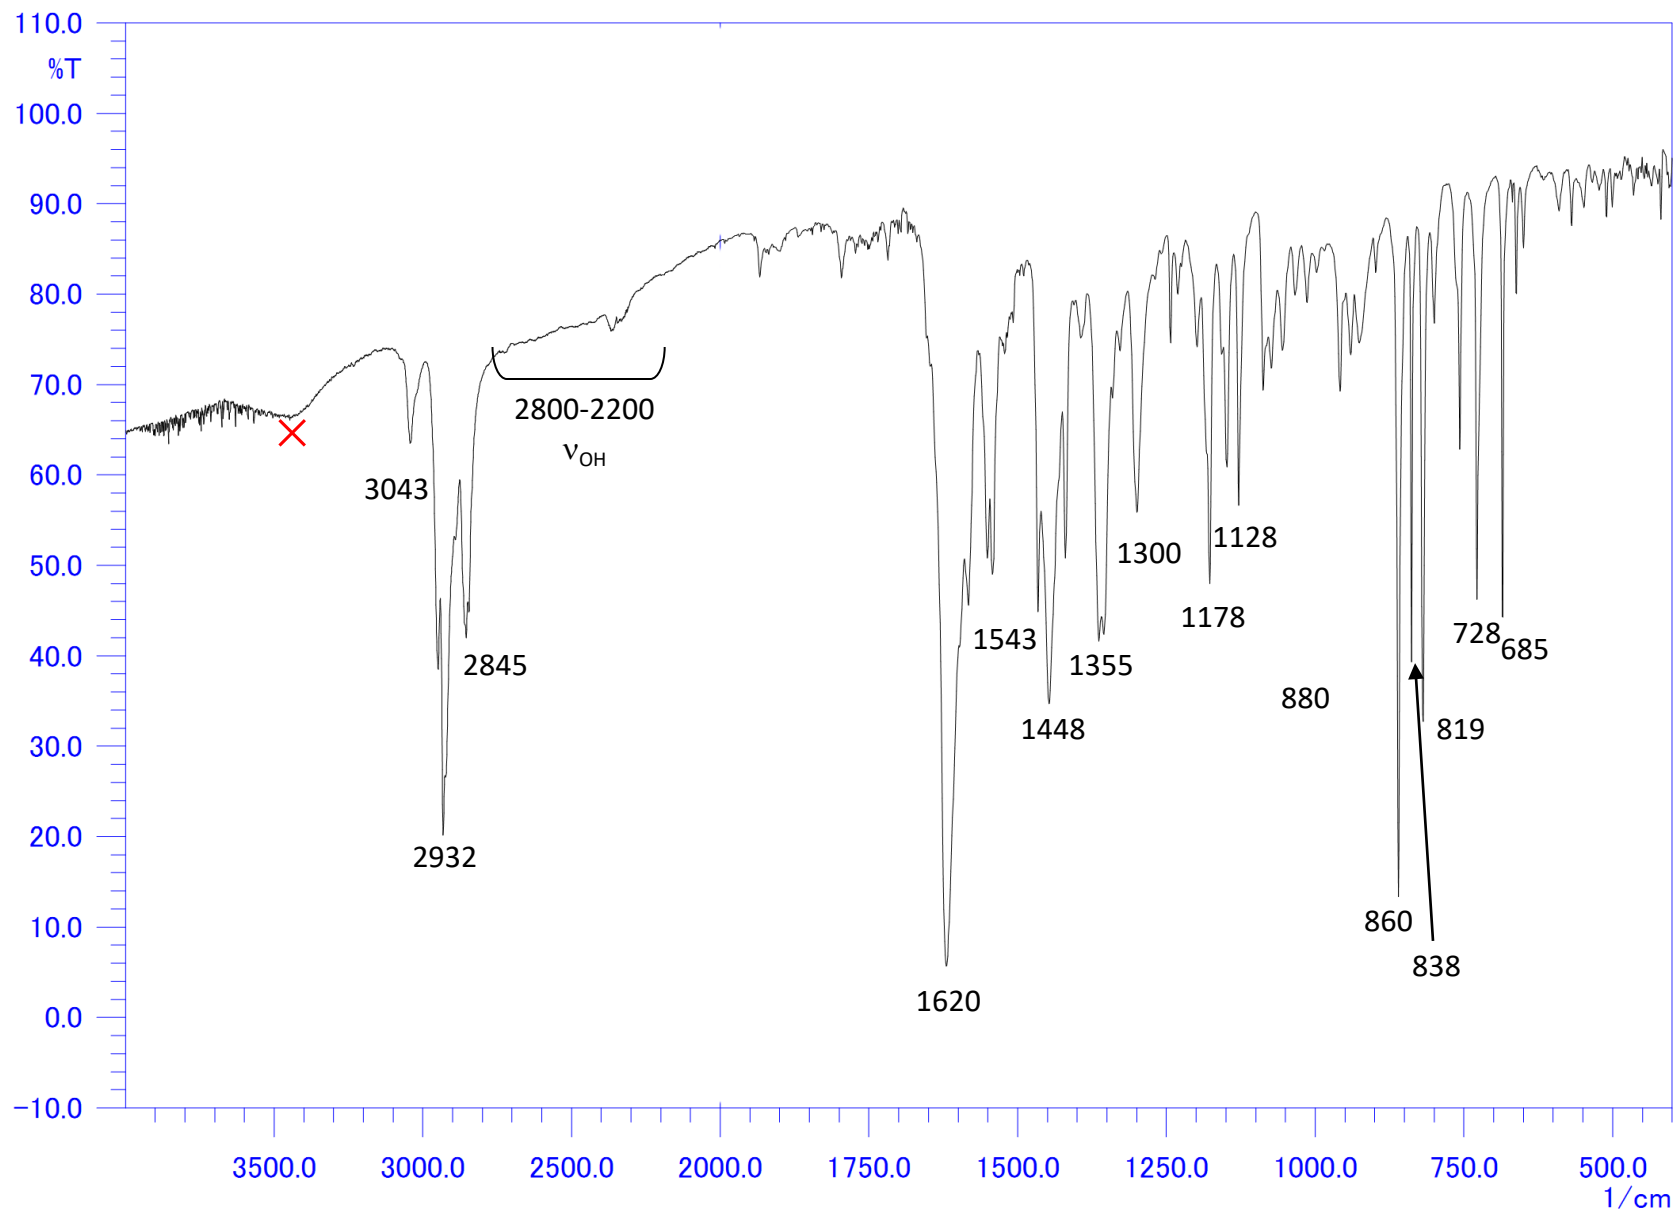

## Absorption Spectrum ( $\text{CH}_2\text{Cl}_2$ )

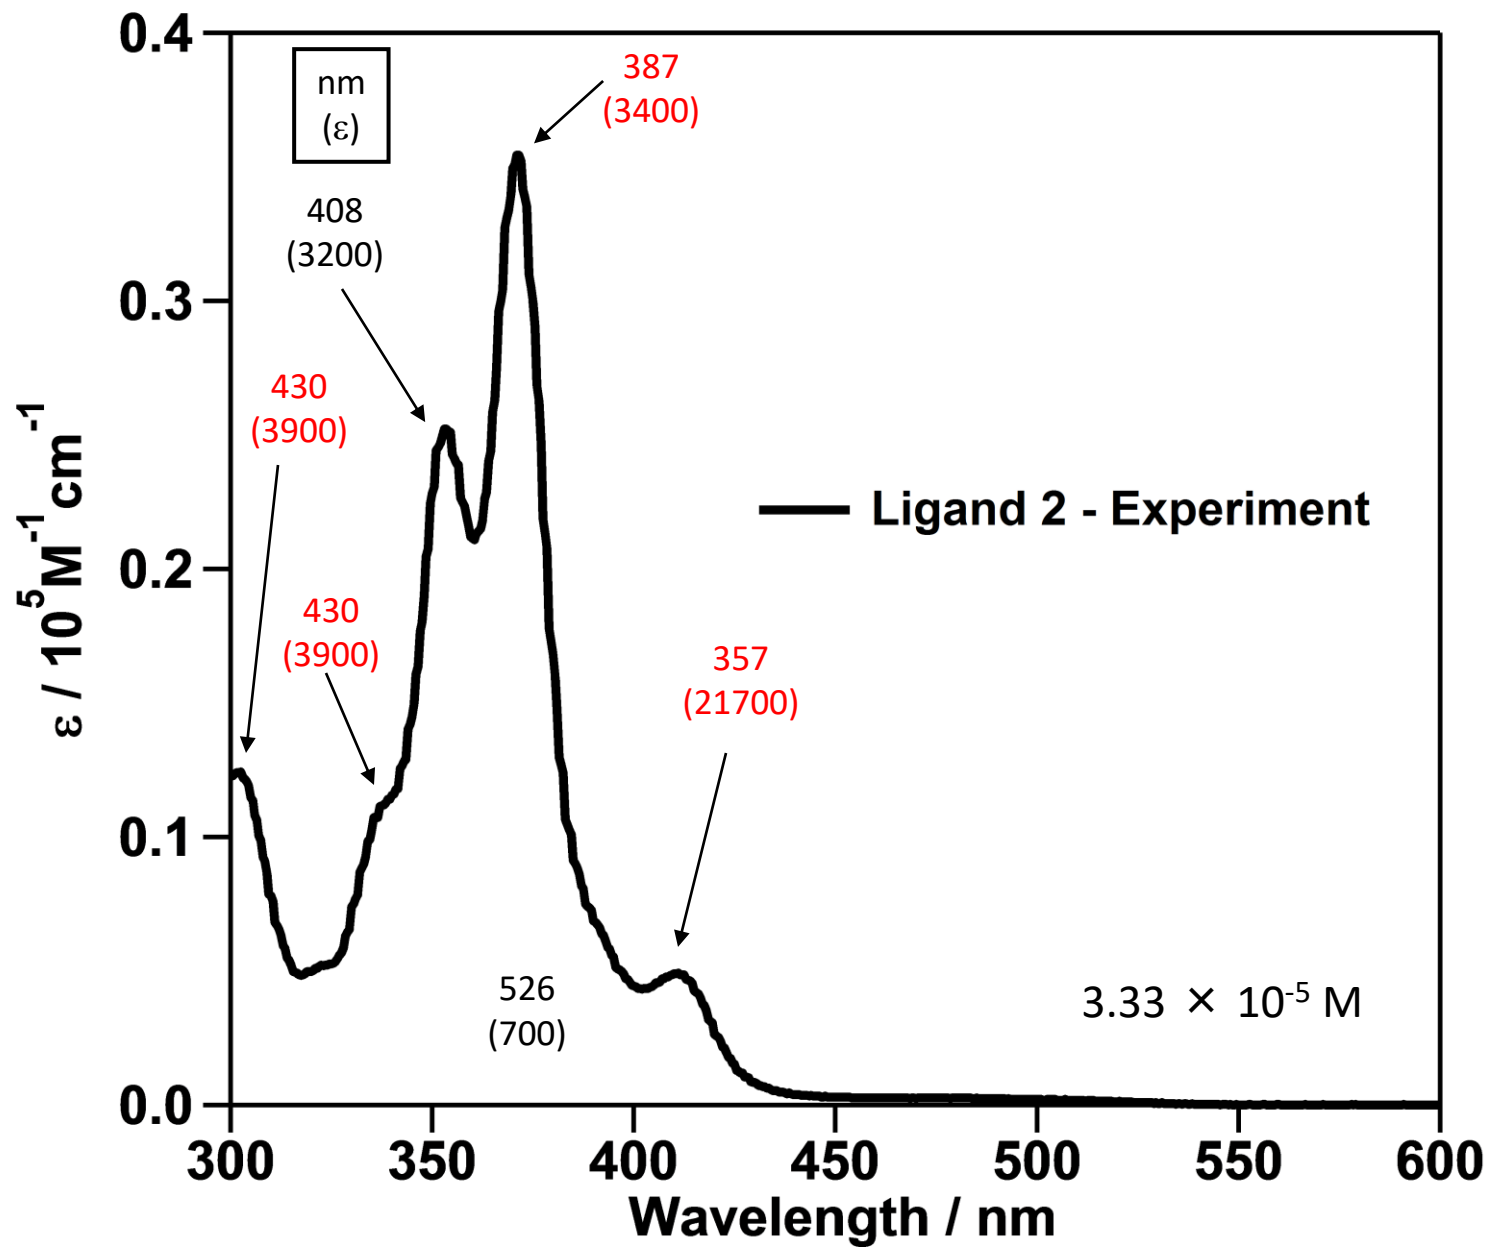

## Obs. and Calcd. Absorption Spectra

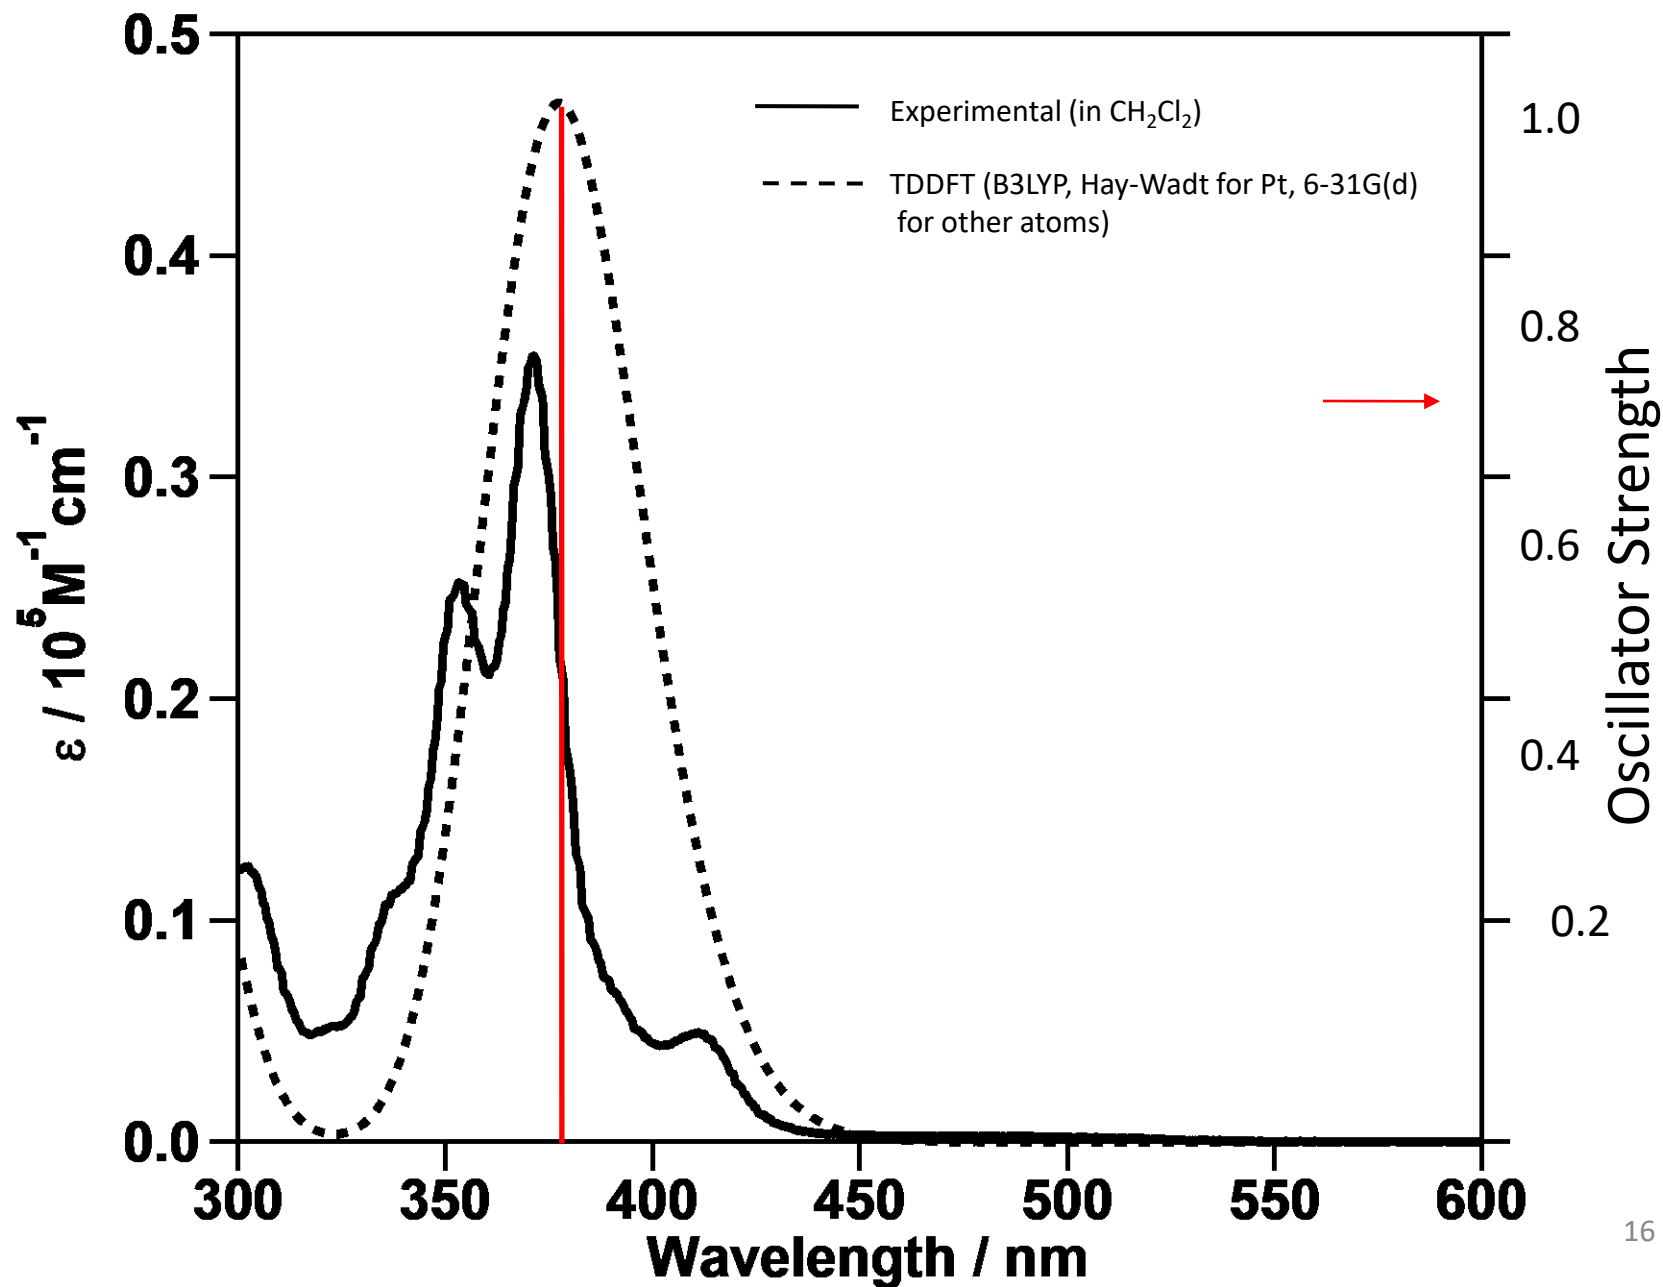



# High Resolution Atmospheric Pressure Chemical Ionization Mass Spectrum

## Generic Display Report

### Analysis Info

Analysis Name D:\Data\inorg1\dien\20140426\new\_lig\_py.d  
Method APCI\_pos\_DIP.m  
Sample Name new\_lig\_py  
Comment

Acquisition Date 4/26/2014 7:14:46 PM

Operator BDAL@DE  
Instrument micrOTOF

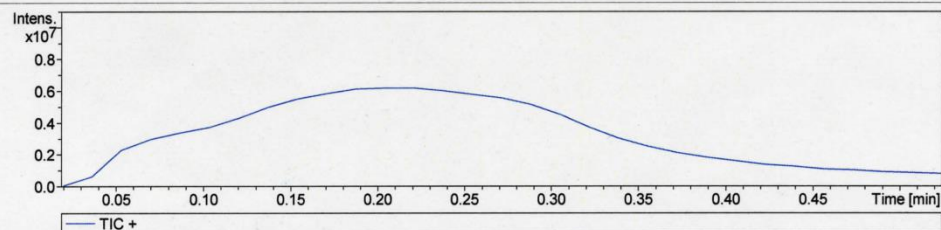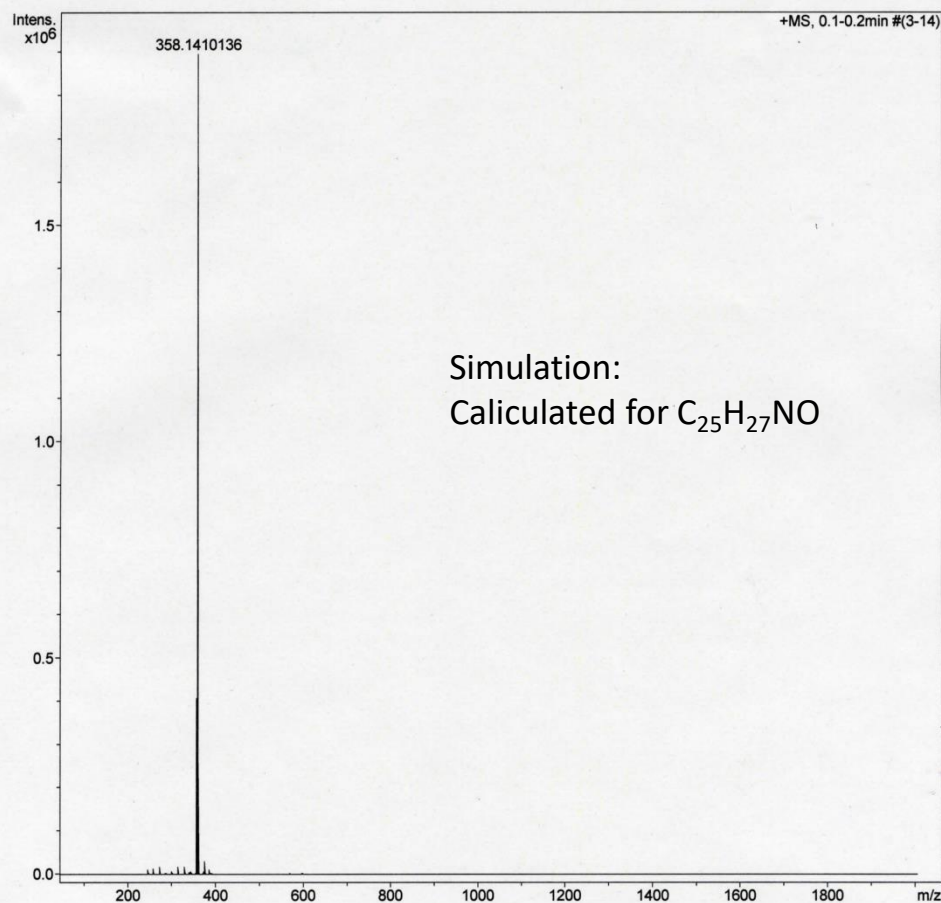

# Expanded Plot of High Resolution Atmospheric Pressure Chemical Ionization Mass Spectrum

---

## Generic Display Report

### Analysis Info

Analysis Name D:\Data\inorg1\dien\20140426\new\_lig\_py.d  
Method APCI\_pos\_DIP.m  
Sample Name new\_lig\_py  
Comment

Acquisition Date 4/26/2014 7:14:46 PM

Operator BDAL@DE  
Instrument micrOTOF

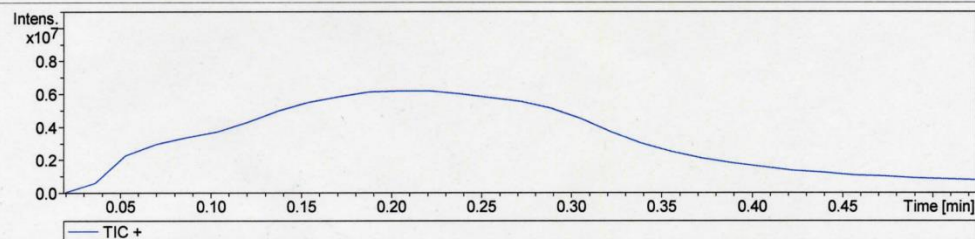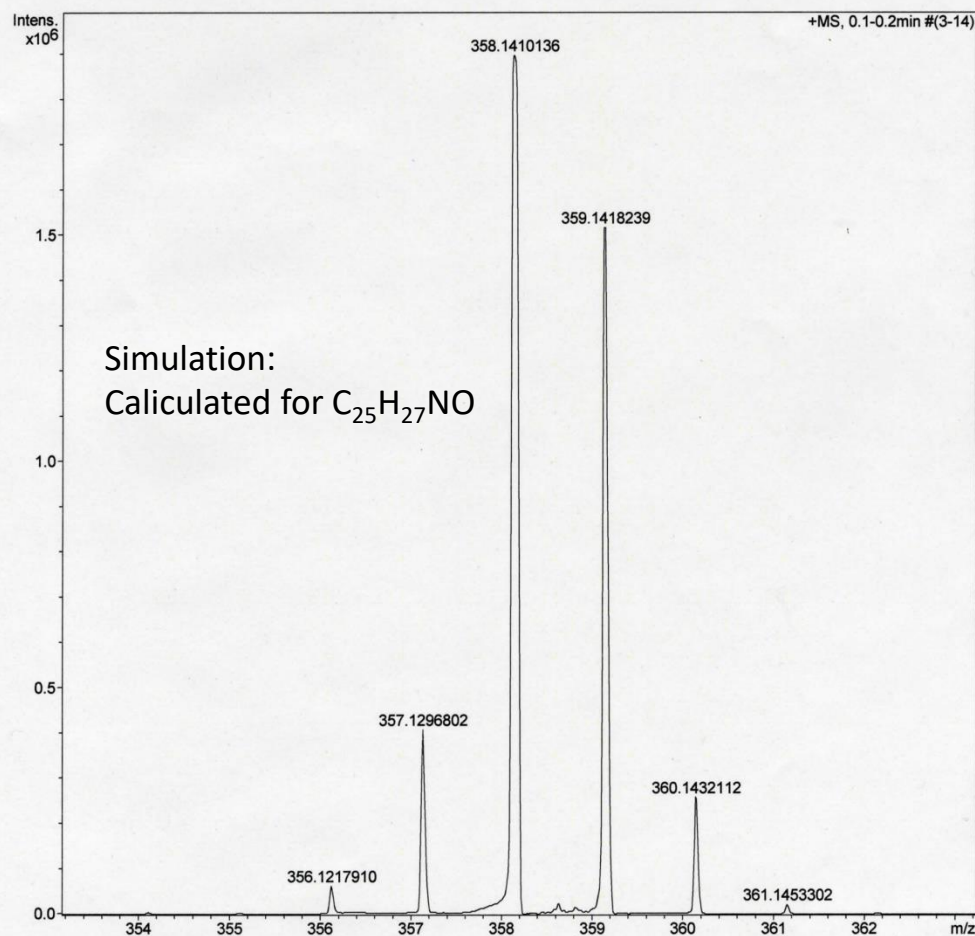

# 2(Pt)

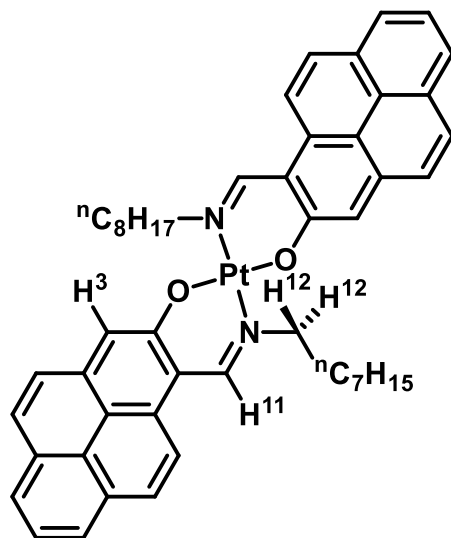

Yield: 70 %  
mp: 216 °C (dec., from PhCl)

Chemical Formula:  $C_{50}H_{52}N_2O_2Pt$   
Molecular Weight: 908.06

# 1(Pt)

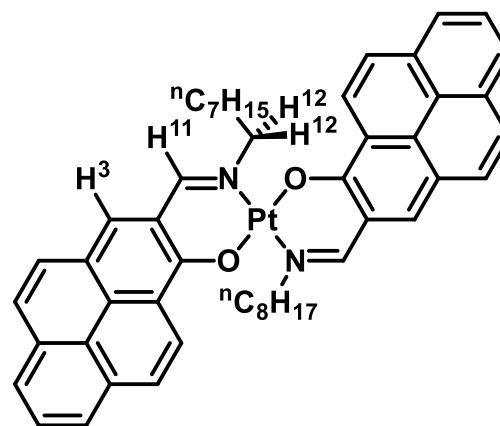

Yield: 80 %  
mp: 285 °C (dec., from PhCl)

Chemical Formula:  $C_{50}H_{52}N_2O_2Pt$   
Molecular Weight: 908.06

# Elemental Analysis

|          | C     | H     | N     |
|----------|-------|-------|-------|
| Calcd.   | 66.14 | 5.77  | 3.09  |
| Found.   | 66.11 | 6.01  | 2.94  |
| $\Delta$ | +0.03 | -0.24 | +0.15 |

calcd. for  
 $C_{50}H_{52}N_2O_2Pt$

found

|                                                                                                                 |                                                                                  |                                                                                                            |                |                |                  |
|-----------------------------------------------------------------------------------------------------------------|----------------------------------------------------------------------------------|------------------------------------------------------------------------------------------------------------|----------------|----------------|------------------|
| Department Name: <i>Chemistry</i>                                                                               |                                                                                  | Date(month/day): <i>4/1/15</i>                                                                             |                |                |                  |
| Lab. Name: <i>Inorganic Chemistry</i>                                                                           |                                                                                  | Approval from Teaching Staff: <i>LT</i>                                                                    |                |                |                  |
| Your Name: <i>LUONG XUAN DIEN</i>                                                                               |                                                                                  |                                                                                                            |                |                |                  |
| Your Position : <input type="checkbox"/> Staff <input checked="" type="checkbox"/> Student (grade: <i>PhD</i> ) |                                                                                  | Your access extension#: <i>356 F</i>                                                                       |                |                |                  |
| Your E-mail: <i>dienlx306@gmail.com</i>                                                                         |                                                                                  |                                                                                                            |                |                |                  |
| Sample Name(Symbolic): <i>DL173</i>                                                                             |                                                                                  |                                                                                                            |                |                |                  |
| Molecular Formula: <i>C<sub>50</sub>H<sub>52</sub>N<sub>2</sub>O<sub>2</sub>Pt</i>                              |                                                                                  | Molecular Weight: <i>908.06</i>                                                                            |                |                |                  |
| property                                                                                                        | mp : _____ °C                                                                    | Structural Formula:<br>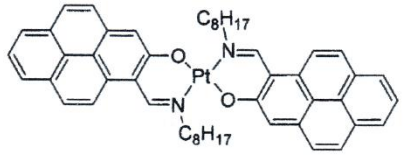 |                |                |                  |
|                                                                                                                 | bp : _____ °C                                                                    |                                                                                                            |                |                |                  |
|                                                                                                                 | Decompose point _____ °C                                                         |                                                                                                            |                |                |                  |
|                                                                                                                 | State: <input type="checkbox"/> Liquid <input checked="" type="checkbox"/> solid |                                                                                                            |                |                |                  |
|                                                                                                                 | <input type="checkbox"/> hygroscopic <input type="checkbox"/> poisonous          |                                                                                                            |                |                |                  |
|                                                                                                                 | <input type="checkbox"/> sublimate or volatile                                   |                                                                                                            |                |                |                  |
| <input type="checkbox"/> photodegradability                                                                     |                                                                                  |                                                                                                            |                |                |                  |
| <input type="checkbox"/> handling in Ar atmosphere                                                              |                                                                                  |                                                                                                            |                |                |                  |
| Sample Wt.                                                                                                      | <i>2.99</i> mg                                                                   |                                                                                                            |                |                |                  |
| Comment & request for measuring:<br>(Ex. <input type="checkbox"/> Double time measuring, etc.)                  |                                                                                  |                                                                                                            |                |                |                  |
| Theoretical cont. (Wt.%)                                                                                        | C: <i>66.14</i>                                                                  | H: <i>5.77</i>                                                                                             | N: <i>3.09</i> | O: <i>3.52</i> | Pt: <i>21.48</i> |

## Result of (Single time) Measurement

| Measured cont. (Wt.%) | C: <i>66.11</i>  | H: <i>6.01</i>   | N: <i>2.94</i>  |  | Used Sample Wt. (mg) |
|-----------------------|------------------|------------------|-----------------|--|----------------------|
| K-factor              | C: <i>22.713</i> | H: <i>42.583</i> | N: <i>7.871</i> |  | <i>1.726</i>         |

Measuring Date (month/day): *4/1/17* (Counter#: *8239*)  Report No: *18*

# NMR Spectrum (CDCl<sub>3</sub>)

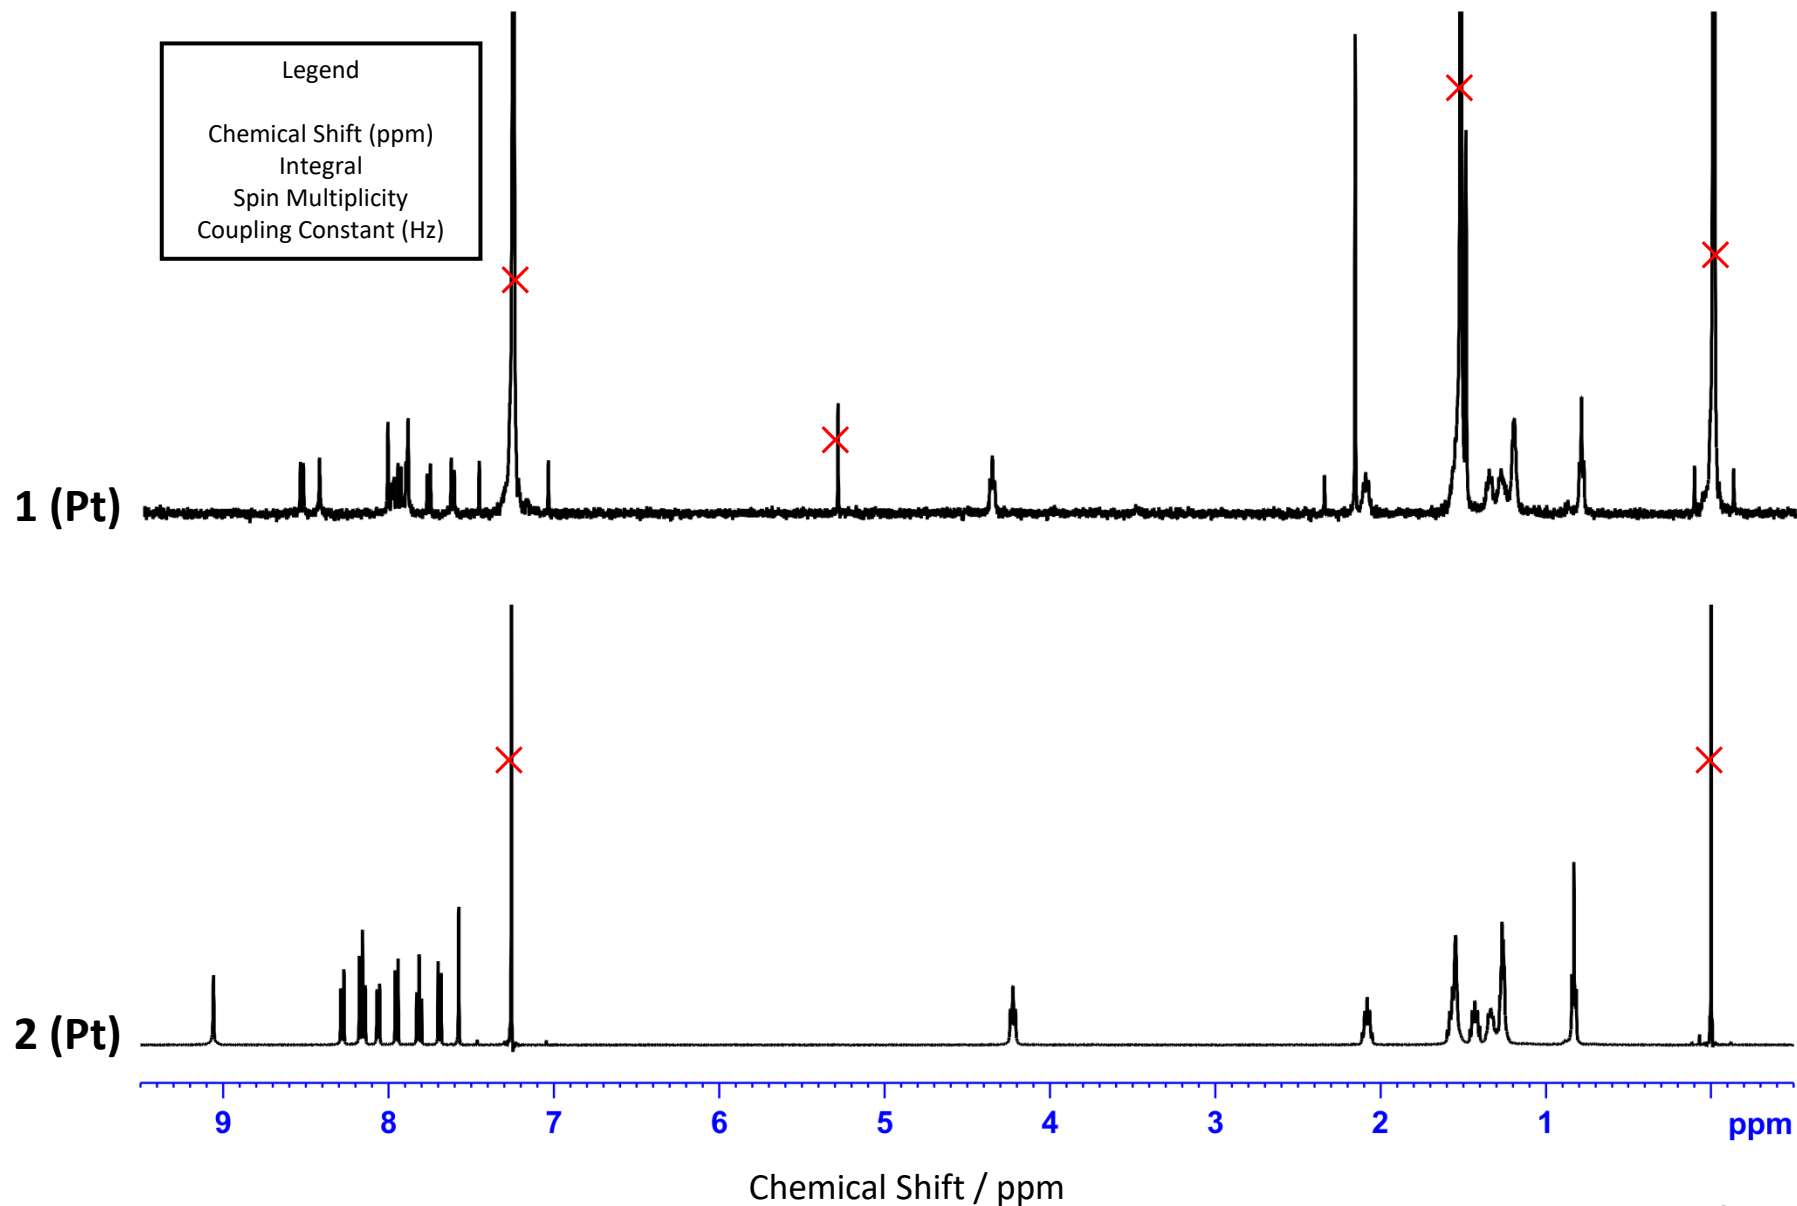

# NMR Spectrum: Expanded Plot ( $\text{CDCl}_3$ )

■ non-first order ABX-pattern attributable to pyrene nucleus,  $\text{H}^6 \sim \text{H}^8$

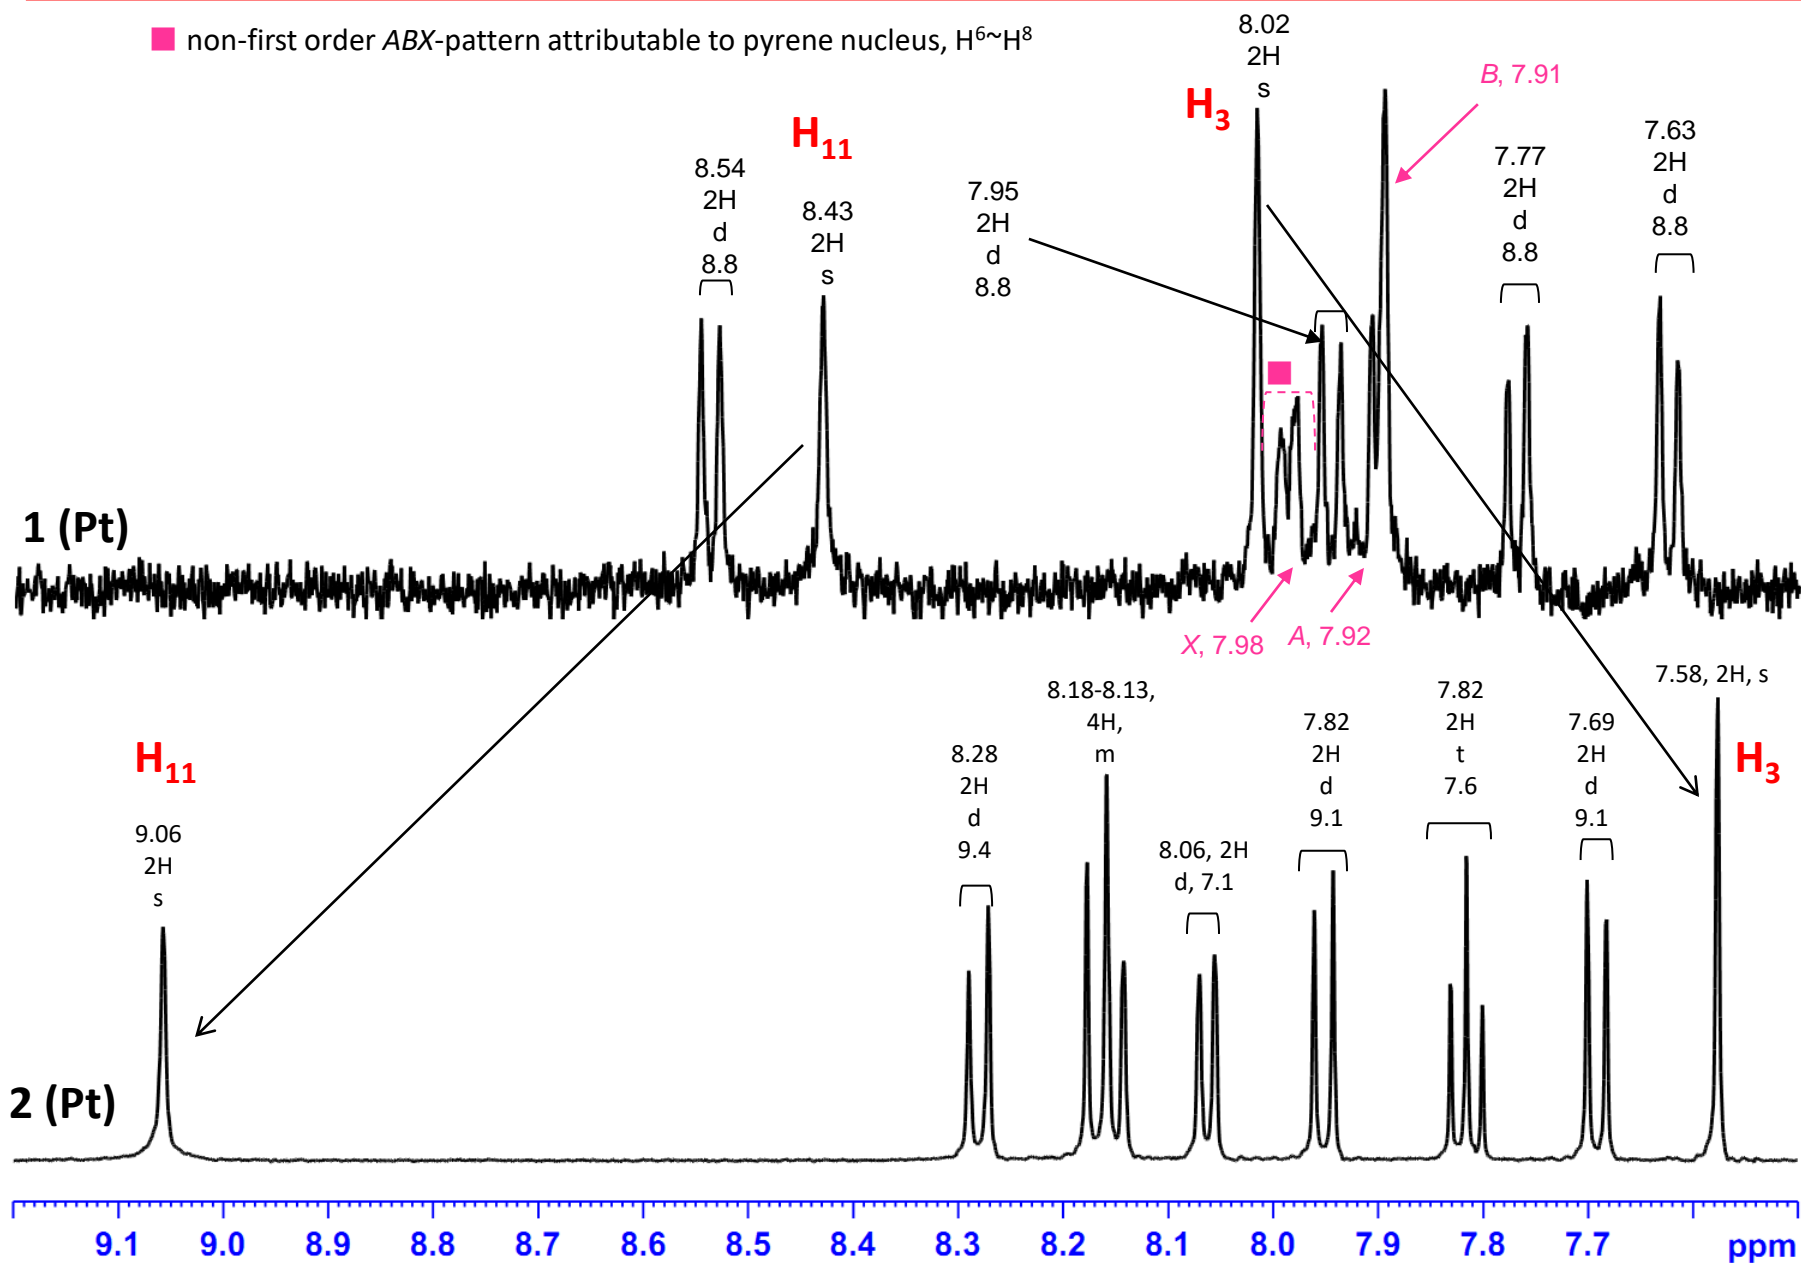

# *NMR Spectrum: Expanded Plot (CDCl<sub>3</sub>)*

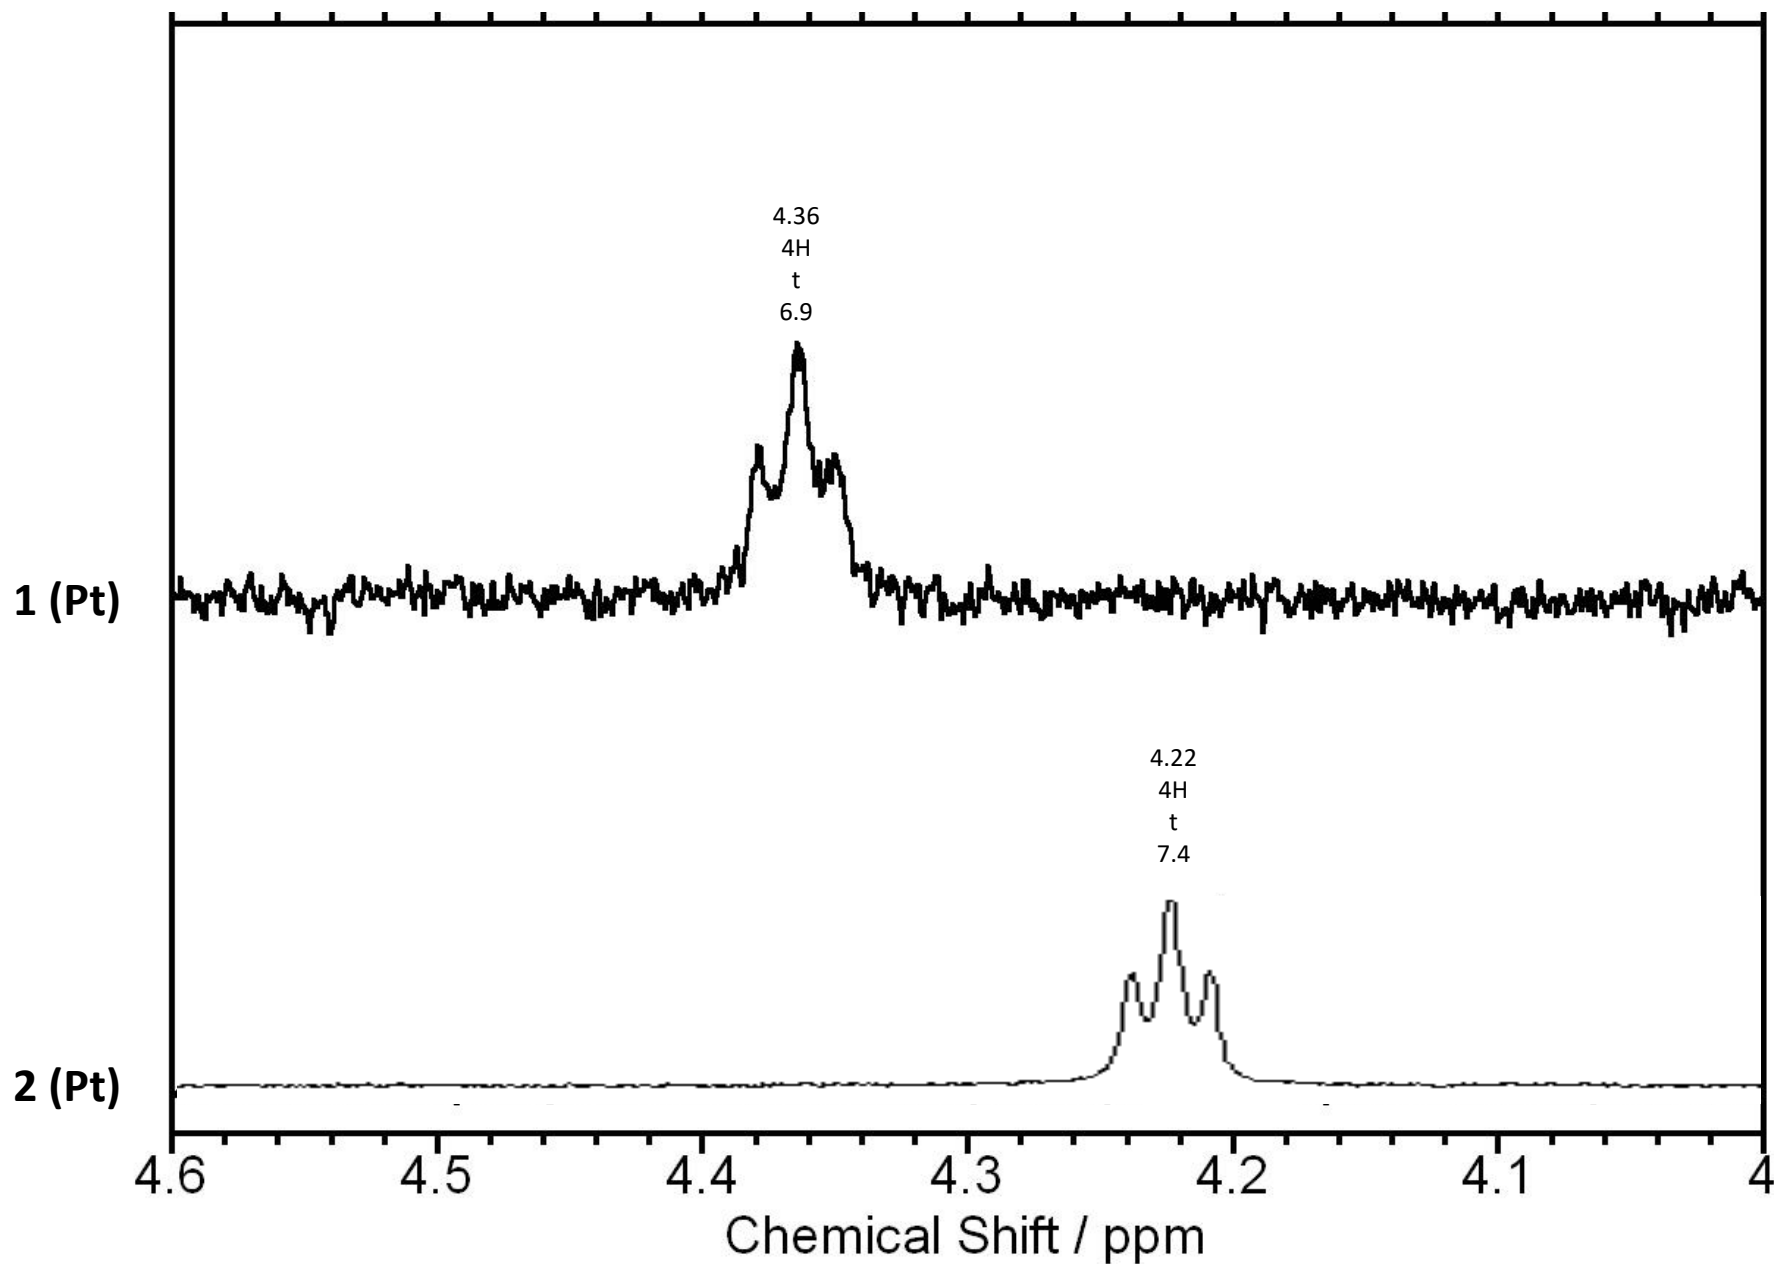

## Absorption Spectrum ( $\text{CH}_2\text{Cl}_2$ )

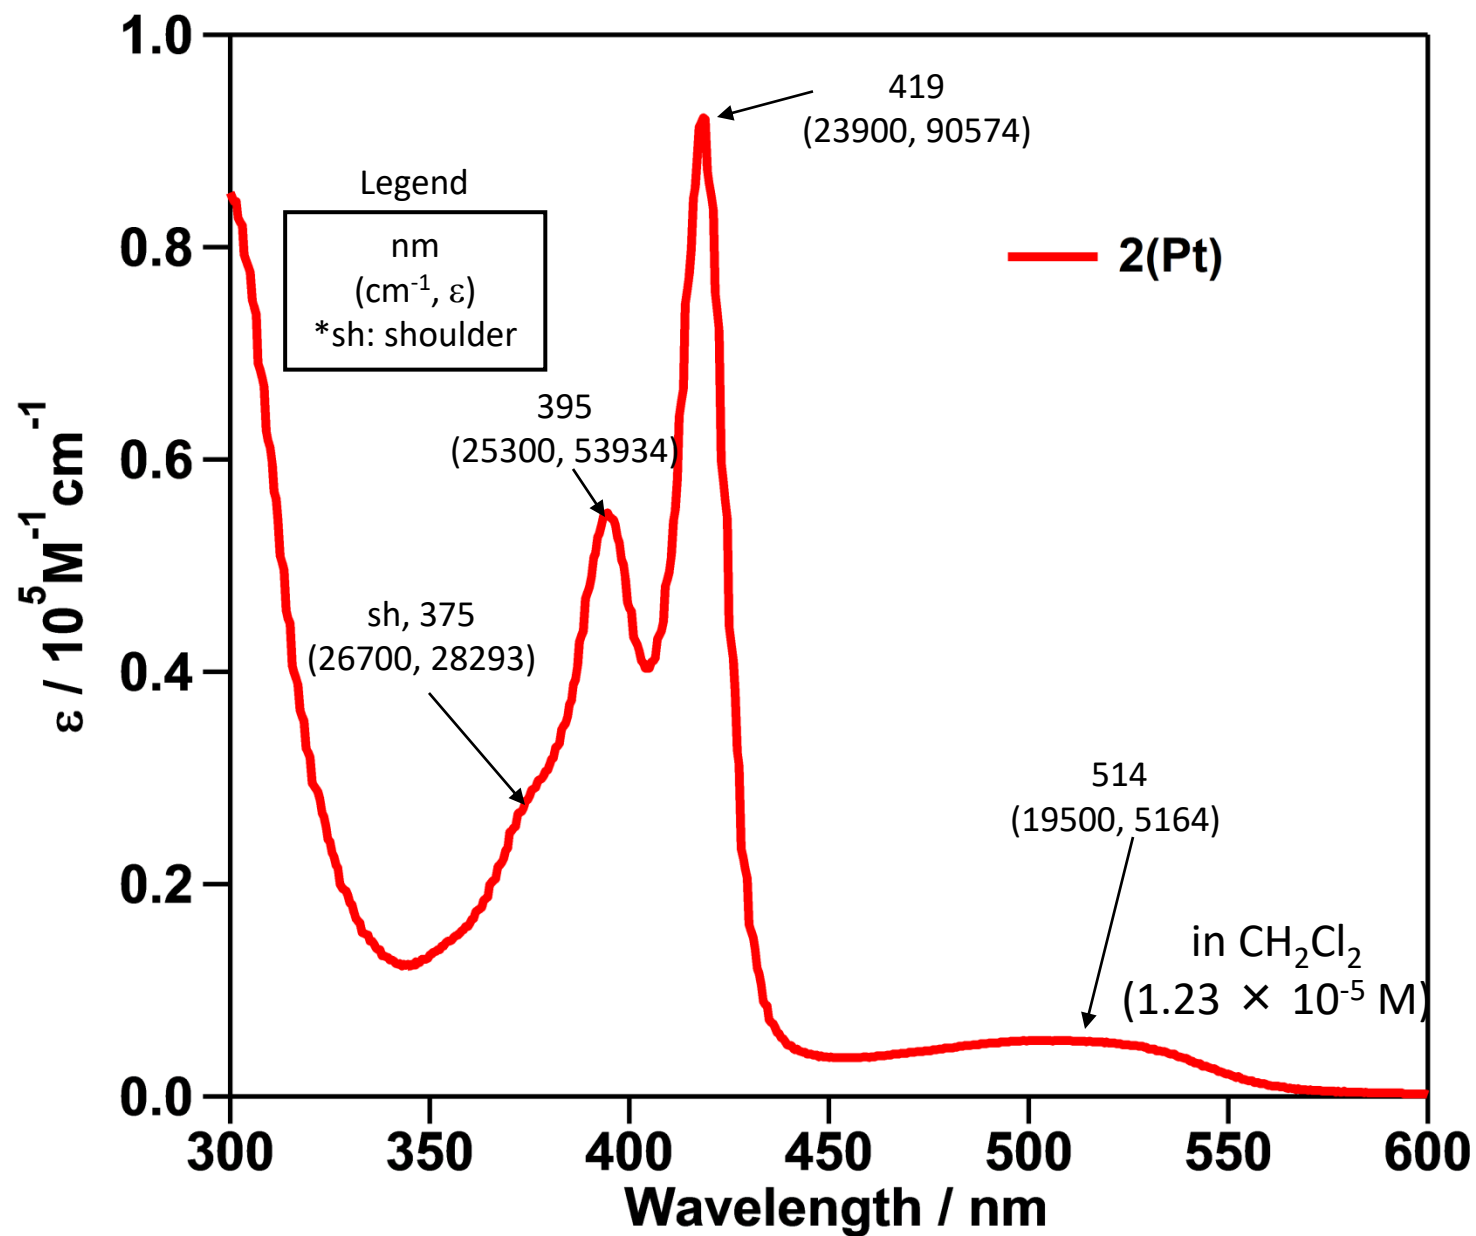



## Obs. and Calcd. Absorption Spectra

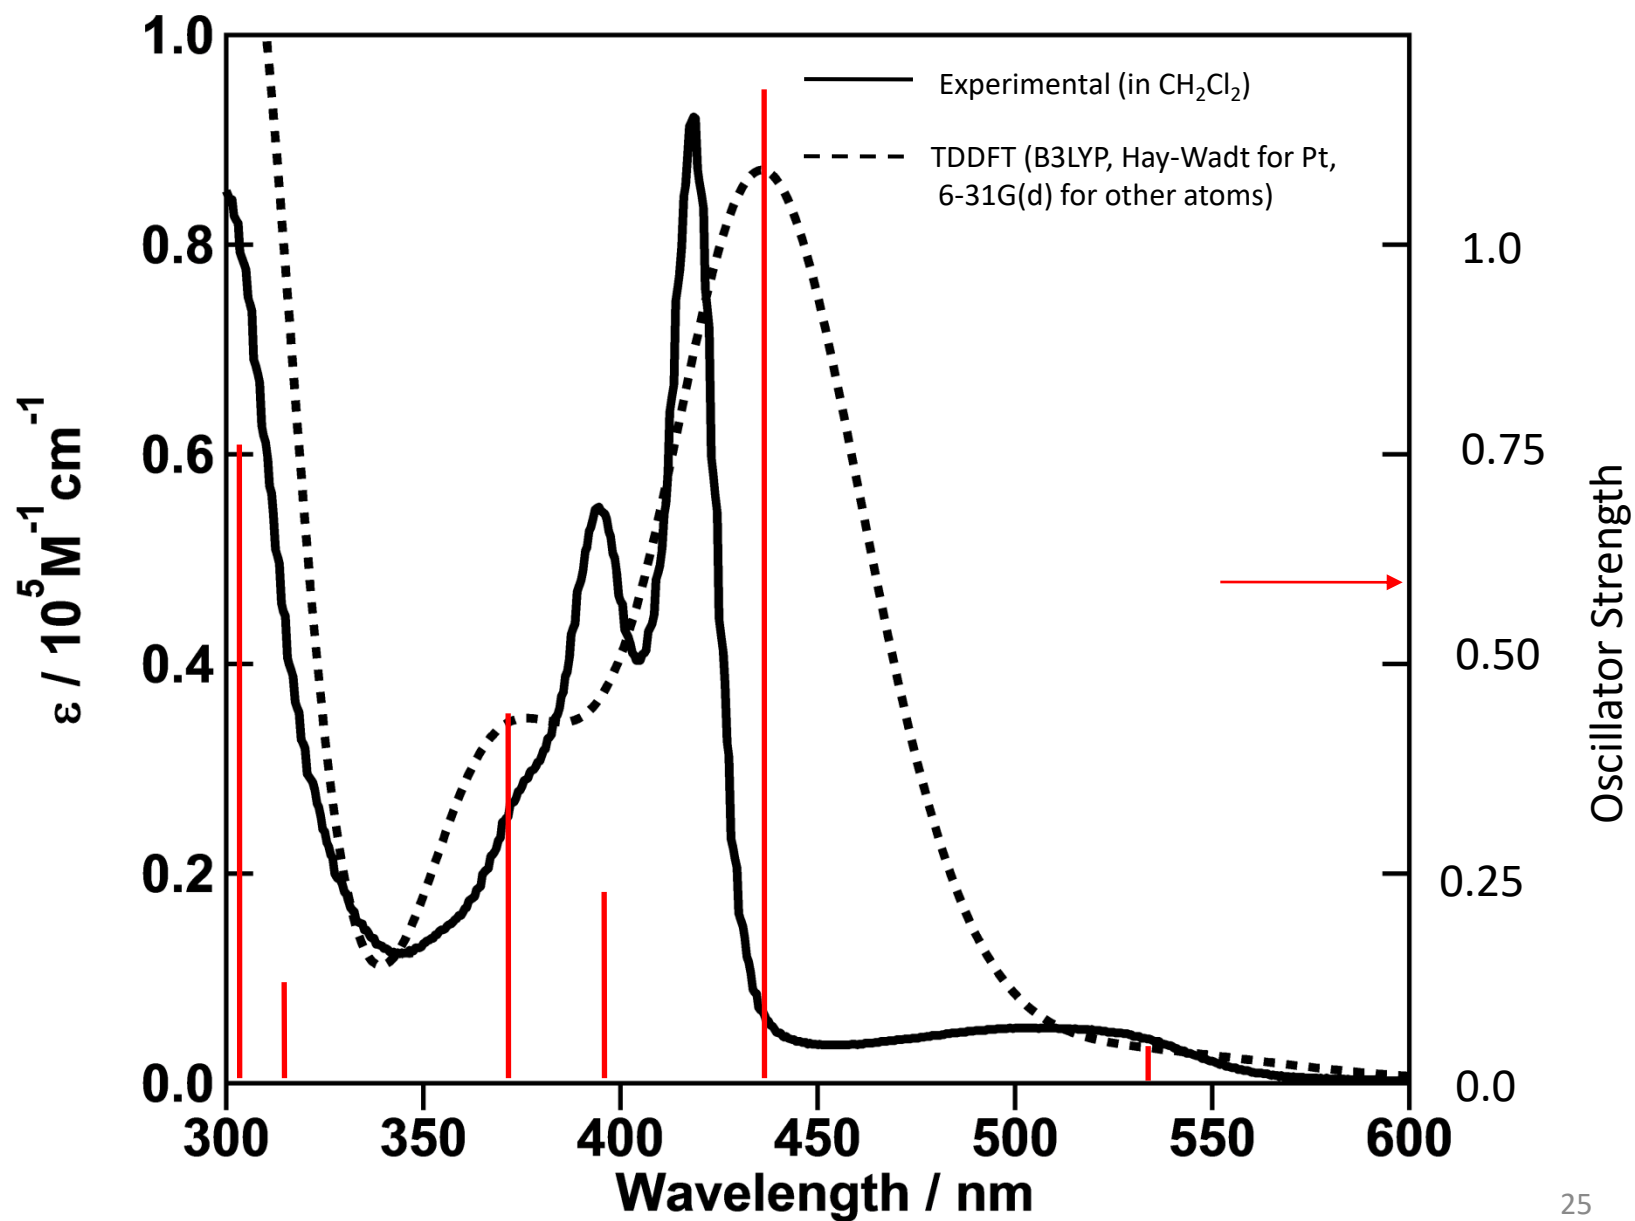

## Assignment of Absorption Spectrum of 2(Pt)

| # of<br>Transition | Observed Transition<br>Energy / eV (nm) | Calculated Transition<br>Energy / eV (nm) | Oscillator<br>Strength $f$ | Composition                                                  | CI   |
|--------------------|-----------------------------------------|-------------------------------------------|----------------------------|--------------------------------------------------------------|------|
| 1                  | 2.42 (514)                              | 2.34 (529.8)                              | 0.04                       | HOMO ( $\phi_{144}$ ) $\rightarrow$ LUMO( $\phi_{145}$ )     | 0.97 |
| 2                  | 2.96 (419)                              | 2.54 (436.6)                              | 1.17                       | HOMO-1 ( $\phi_{143}$ ) $\rightarrow$ LUMO( $\phi_{145}$ )   | 0.96 |
| 3                  | 3.14 (395)                              | 3.17(391.3)                               | 0.22                       | HOMO-2 ( $\phi_{142}$ ) $\rightarrow$ LUMO+1( $\phi_{146}$ ) | 0.92 |
| 4                  | sh, <sup>†</sup> 3.31 (375)             | 3.39 (365.7)                              | 0.36                       | HOMO-3 ( $\phi_{141}$ ) $\rightarrow$ LUMO+1( $\phi_{146}$ ) | 0.84 |
| 5                  | -                                       | 3.94 (314.4)                              | 0.11                       | HOMO-6( $\phi_{138}$ ) $\rightarrow$ LUMO( $\phi_{145}$ )    | 0.76 |
| 6                  | -                                       | 4.07(304.9)                               | 0.75                       | HOMO( $\phi_{144}$ ) $\rightarrow$ LUMO+4 ( $\phi_{149}$ )   | 0.46 |
|                    |                                         | 4.08(303.9)                               | 0.40                       | HOMO -8( $\phi_{136}$ ) $\rightarrow$ LUMO( $\phi_{145}$ )   | 0.67 |

Program: Gaussian R-09W Ver.7 + Gauss View Ver.5  
 Method: B3LYP / TD-DFT  
 Basis Set: Hay-Wadt for Pt, 6-31G(d) for C, N, O, and H

50 excited states were calculated. Excited states having oscillator strength  $f > 0.01$  are considered. The main configuration with configuration interaction (CI) coefficient  $> 0.3$  were considered.

<sup>†</sup> shoulder

# High Resolution Atmospheric Pressure Chemical Ionization Mass Spectrum

## Generic Display Report

### Analysis Info

Analysis Name D:\Data\inorg1\dien\20140426\new\_Pt\_py.d  
Method APCI\_pos\_DIP.m  
Sample Name new\_Pt\_py  
Comment

Acquisition Date 4/26/2014 7:20:02 PM

Operator BDAL@DE  
Instrument micrOTOF

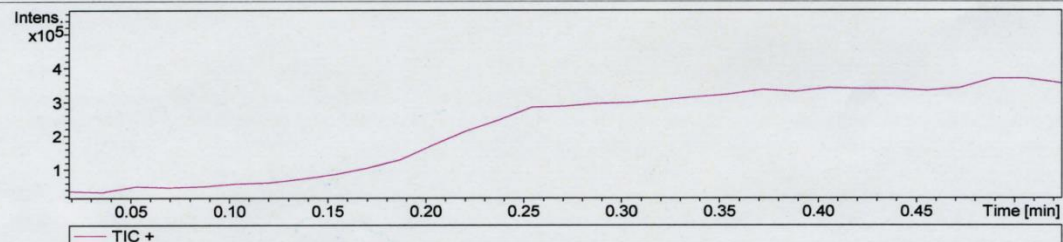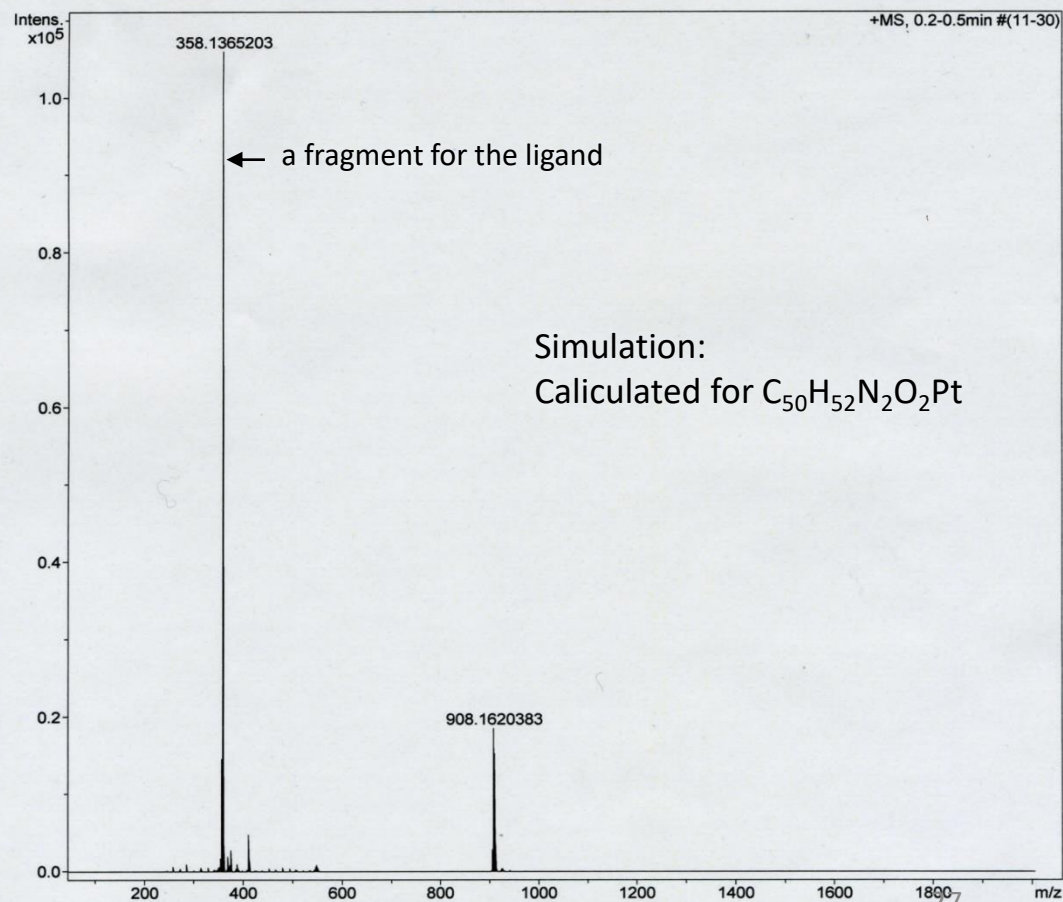

# Expanded Plot of High Resolution Atmospheric Pressure Chemical Ionization Mass Spectrum

---

## Generic Display Report

### Analysis Info

Analysis Name D:\Data\inorg1\dien\20140426\new\_Pt\_py.d  
Method APCI\_pos\_DIP.m  
Sample Name new\_Pt\_py  
Comment

Acquisition Date 4/26/2014 7:20:02 PM

Operator BDAL@DE  
Instrument micrOTOF

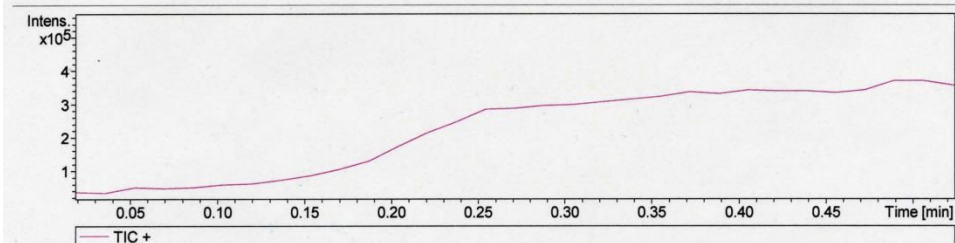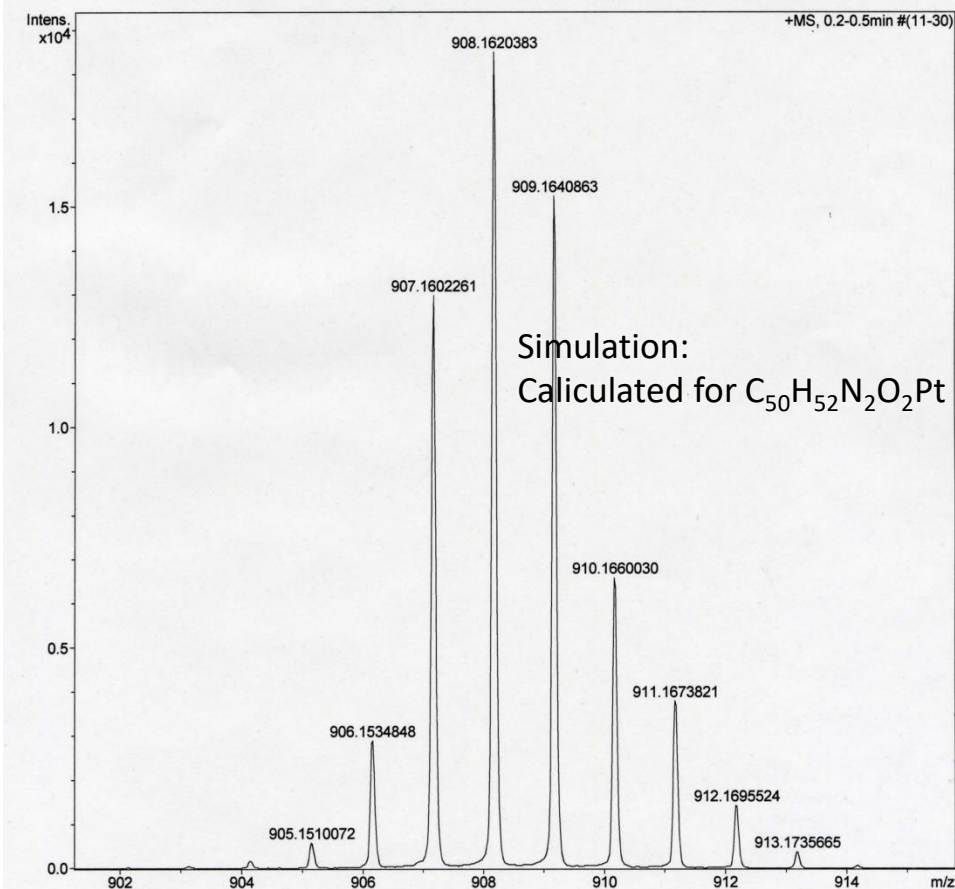

Supplement: s1 [file s1]
