# Supplementary material
Source: MDPI journal article supplement (https://www.mdpi.com/2073-4352/10/6/476)
Supplement: s1 [file s1]

dien\_PtC7pyrene\_7

|           |              |                                                                                     |      |
|-----------|--------------|-------------------------------------------------------------------------------------|------|
| 測定日       | 14/10/20     | 測定者名                                                                                | dien |
| 化合物名      | PtC7pyrene   | 構造                                                                                  |      |
| 略称(10字以内) | PtC7pyrene   | 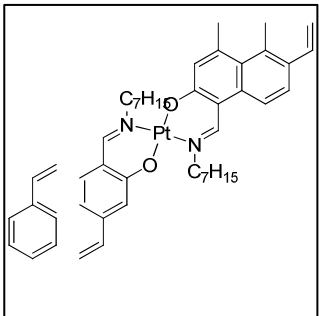 |      |
| 組成        | C48H48N2O2Pt |                                                                                     |      |
| 分子量       | 879.98       |                                                                                     |      |
| 使用溶媒      | CHCl3-EtOAc  |                                                                                     |      |
| 結晶化方法     | 気相拡散法        |                                                                                     |      |

|                 |                    |      |
|-----------------|--------------------|------|
| Crystal shape   | plate              | Note |
| Crystal color   | red                |      |
| Crystal size    | 0.04 x 0.03 x 0.03 |      |
| Machine         | rigaku, xtallab    |      |
| Mounting        | cryoloop, palaton  |      |
| Temp            | -100 C             |      |
| Exposure time   | 6                  |      |
| Number of frame | width 0.5          |      |

|                |            |               |
|----------------|------------|---------------|
| Crystal system | Monoclinic | Note<br>1/2分子 |
| Space group    | P21/c      |               |
| <i>Z</i>       | 2          |               |
| <i>a</i>       | 4.8015(9)  |               |
| <i>b</i>       | 14.434(2)  |               |
| <i>c</i>       | 27.072(5)  |               |
| $\alpha$       | 90         |               |
| $\beta$        | 93.043(7)  |               |
| $\gamma$       | 90         |               |
| <i>V</i>       | 1873.6(6)  |               |
| R factor       | 0.0500     |               |

ORTEP 50% probability

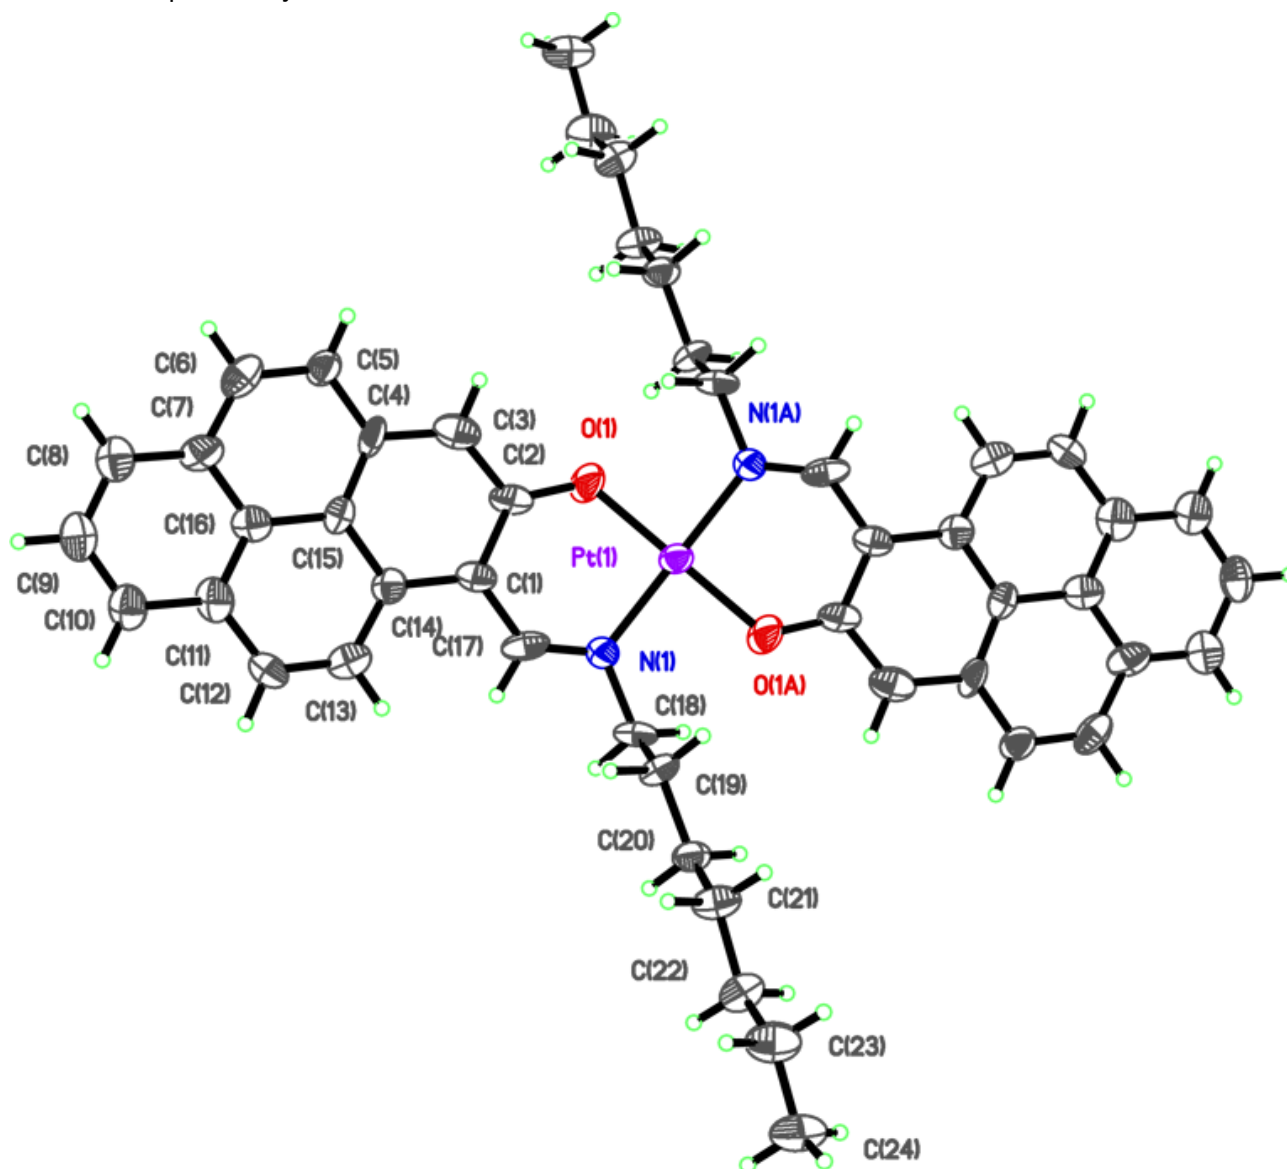

# checkCIF/PLATON report

You have not supplied any structure factors. As a result the full set of tests cannot be run.

THIS REPORT IS FOR GUIDANCE ONLY. IF USED AS PART OF A REVIEW PROCEDURE FOR PUBLICATION, IT SHOULD NOT REPLACE THE EXPERTISE OF AN EXPERIENCED CRYSTALLOGRAPHIC REFEREE.

No syntax errors found.      CIF dictionary      Interpreting this report

## Datablock: P21c

---

Bond precision:    C-C = 0.0140 Å                      Wavelength=0.71075

Cell:                      a=4.8015(9)              b=14.434(2)              c=27.072(5)  
                                alpha=90              beta=93.043(7)              gamma=90

Temperature:              173 K

|                | Calculated       | Reported         |
|----------------|------------------|------------------|
| Volume         | 1873.6(6)        | 1873.6(6)        |
| Space group    | P 21/c           | P 21/c           |
| Hall group     | -P 2ybc          | -P 2ybc          |
| Moiety formula | C48 H48 N2 O2 Pt | ?                |
| Sum formula    | C48 H48 N2 O2 Pt | C48 H48 N2 O2 Pt |
| Mr             | 879.96           | 879.97           |
| Dx,g cm-3      | 1.560            | 1.560            |
| Z              | 2                | 2                |
| Mu (mm-1)      | 3.788            | 3.788            |
| F000           | 888.0            | 888.0            |
| F000'          | 884.94           |                  |
| h,k,lmax       | 6,18,35          | 6,18,35          |
| Nref           | 4324             | 4308             |
| Tmin,Tmax      | 0.873,0.893      | 0.737,1.000      |
| Tmin'          | 0.859            |                  |

Correction method= EMPIRICAL

Data completeness= 0.996                      Theta(max)= 27.524

R(reflections)= 0.0500( 2911)              wR2(reflections)= 0.2349( 4308)

S = 1.194                      Npar= 242

---

The following ALERTS were generated. Each ALERT has the format  
**test-name\_ALERT\_alert-type\_alert-level.**  
Click on the hyperlinks for more details of the test.

---

### ● Alert level C

ABSTY02\_ALERT\_1\_C An \_exptl\_absorpt\_correction\_type has been given without  
a literature citation. This should be contained in the  
\_exptl\_absorpt\_process\_details field.  
Absorption correction given as empirical

|                   |                            |           |       |     |    |        |      |
|-------------------|----------------------------|-----------|-------|-----|----|--------|------|
| PLAT230_ALERT_2_C | Hirshfeld Test Diff for    | N1        | --    | C17 | .. | 5.2    | su   |
| PLAT234_ALERT_4_C | Large Hirshfeld Difference | C3        | --    | C4  | .. | 0.20   | Ang. |
| PLAT342_ALERT_3_C | Low Bond Precision on      | C-C Bonds | ..... |     |    | 0.0140 | Ang. |
| PLAT410_ALERT_2_C | Short Intra H...H Contact  | H13       | ..    | H17 | .. | 1.95   | Ang. |

---

### ● Alert level G

|                   |                                                 |    |  |      |  |      |        |
|-------------------|-------------------------------------------------|----|--|------|--|------|--------|
| PLAT072_ALERT_2_G | SHELXL First Parameter in WGHT Unusually Large. |    |  |      |  | 0.13 | Report |
| PLAT333_ALERT_2_G | Check Large Av C6-Ring C-C Dist.                | C1 |  | -C14 |  | 1.43 | Ang.   |

---

|      |                      |                                                              |
|------|----------------------|--------------------------------------------------------------|
| 0    | <b>ALERT level A</b> | = Most likely a serious problem - resolve or explain         |
| 0    | <b>ALERT level B</b> | = A potentially serious problem, consider carefully          |
| 5    | <b>ALERT level C</b> | = Check. Ensure it is not caused by an omission or oversight |
| 2    | <b>ALERT level G</b> | = General information/check it is not something unexpected   |
| <br> |                      |                                                              |
| 1    | ALERT type 1         | CIF construction/syntax error, inconsistent or missing data  |
| 4    | ALERT type 2         | Indicator that the structure model may be wrong or deficient |
| 1    | ALERT type 3         | Indicator that the structure quality may be low              |
| 1    | ALERT type 4         | Improvement, methodology, query or suggestion                |
| 0    | ALERT type 5         | Informative message, check                                   |

---

It is advisable to attempt to resolve as many as possible of the alerts in all categories. Often the minor alerts point to easily fixed oversights, errors and omissions in your CIF or refinement strategy, so attention to these fine details can be worthwhile. In order to resolve some of the more serious problems it may be necessary to carry out additional measurements or structure refinements. However, the purpose of your study may justify the reported deviations and the more serious of these should normally be commented upon in the discussion or experimental section of a paper or in the "special\_details" fields of the CIF. checkCIF was carefully designed to identify outliers and unusual parameters, but every test has its limitations and alerts that are not important in a particular case may appear. Conversely, the absence of alerts does not guarantee there are no aspects of the results needing attention. It is up to the individual to critically assess their own results and, if necessary, seek expert advice.

### Publication of your CIF in IUCr journals

A basic structural check has been run on your CIF. These basic checks will be run on all CIFs submitted for publication in IUCr journals (*Acta Crystallographica*, *Journal of Applied Crystallography*, *Journal of Synchrotron Radiation*); however, if you intend to submit to *Acta Crystallographica Section C* or *E*, you should make sure that full publication checks are run on the final version of your CIF prior to submission.

### Publication of your CIF in other journals

Please refer to the *Notes for Authors* of the relevant journal for any special instructions relating to CIF submission.

Datablock P21c - ellipsoid plot

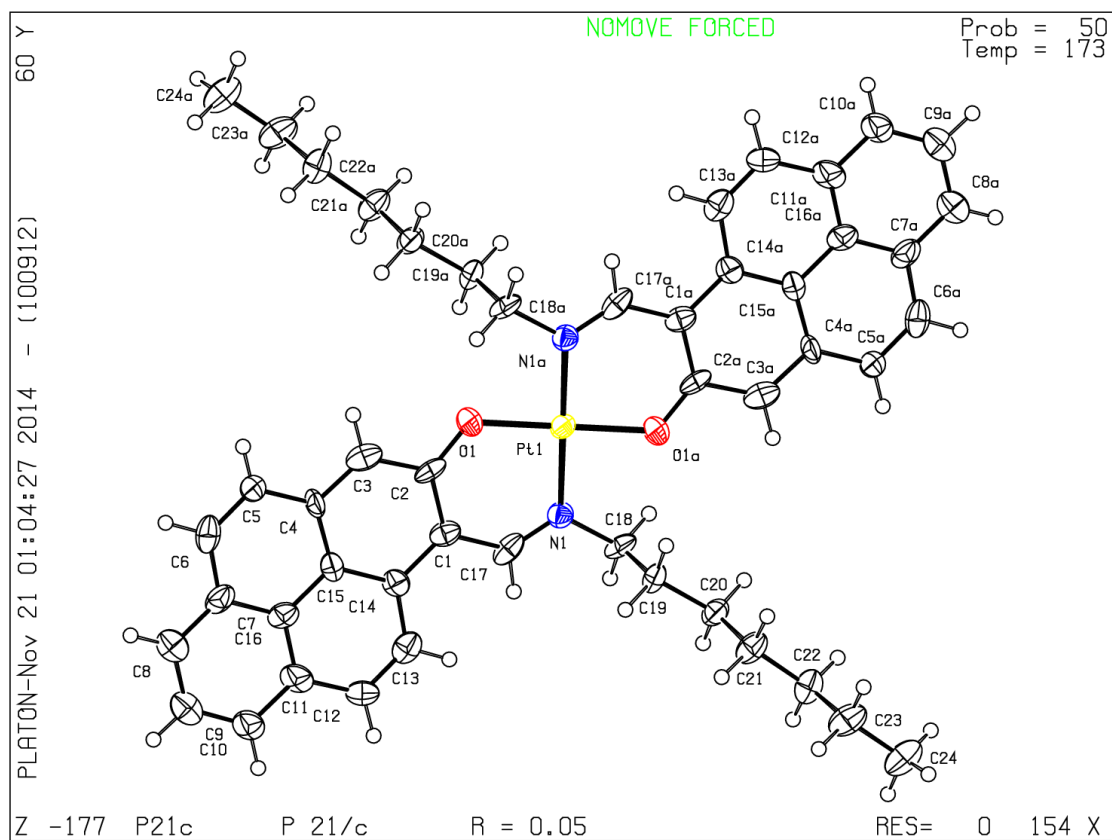

Table 7. Crystal data and structure refinement for P21c.

|                                   |                                                                  |                 |
|-----------------------------------|------------------------------------------------------------------|-----------------|
| Identification code               | P21c                                                             |                 |
| Empirical formula                 | C <sub>48</sub> H <sub>48</sub> N <sub>2</sub> O <sub>2</sub> Pt |                 |
| Formula weight                    | 879.97                                                           |                 |
| Temperature                       | 173(2) K                                                         |                 |
| Wavelength                        | 0.71075 Å                                                        |                 |
| Crystal system                    | Monoclinic                                                       |                 |
| Space group                       | P2 <sub>1</sub> /c                                               |                 |
| Unit cell dimensions              | a = 4.8015(9) Å                                                  | α = 90°.        |
|                                   | b = 14.434(2) Å                                                  | β = 93.043(7)°. |
|                                   | c = 27.072(5) Å                                                  | γ = 90°.        |
| Volume                            | 1873.6(6) Å <sup>3</sup>                                         |                 |
| Z                                 | 2                                                                |                 |
| Density (calculated)              | 1.560 Mg/m <sup>3</sup>                                          |                 |
| Absorption coefficient            | 3.788 mm <sup>-1</sup>                                           |                 |
| F(000)                            | 888                                                              |                 |
| Crystal size                      | 0.040 x 0.030 x 0.030 mm <sup>3</sup>                            |                 |
| Theta range for data collection   | 3.014 to 27.524°.                                                |                 |
| Index ranges                      | -6 ≤ h ≤ 6, -18 ≤ k ≤ 18, -35 ≤ l ≤ 35                           |                 |
| Reflections collected             | 17433                                                            |                 |
| Independent reflections           | 4308 [R(int) = 0.0915]                                           |                 |
| Completeness to theta = 25.242°   | 99.8 %                                                           |                 |
| Absorption correction             | Empirical                                                        |                 |
| Max. and min. transmission        | 1.000 and 0.737                                                  |                 |
| Refinement method                 | Full-matrix least-squares on F <sup>2</sup>                      |                 |
| Data / restraints / parameters    | 4308 / 0 / 242                                                   |                 |
| Goodness-of-fit on F <sup>2</sup> | 1.194                                                            |                 |
| Final R indices [I > 2σ(I)]       | R1 = 0.0500, wR2 = 0.1435                                        |                 |
| R indices (all data)              | R1 = 0.0881, wR2 = 0.2349                                        |                 |
| Extinction coefficient            | n/a                                                              |                 |
| Largest diff. peak and hole       | 2.299 and -2.736 e.Å <sup>-3</sup>                               |                 |

Table 8. Atomic coordinates ( $\times 10^4$ ) and equivalent isotropic displacement parameters ( $\text{\AA}^2 \times 10^3$ ) for P21c.  $U(\text{eq})$  is defined as one third of the trace of the orthogonalized  $U^{ij}$  tensor.

|       | x         | y        | z        | $U(\text{eq})$ |
|-------|-----------|----------|----------|----------------|
| C(1)  | 7152(19)  | 9188(6)  | 1109(3)  | 34(2)          |
| C(2)  | 8270(20)  | 10032(5) | 938(4)   | 32(2)          |
| C(3)  | 10410(20) | 10473(7) | 1251(4)  | 43(2)          |
| C(4)  | 11530(30) | 10099(6) | 1697(4)  | 36(2)          |
| C(5)  | 13740(20) | 10528(7) | 1962(3)  | 39(2)          |
| C(6)  | 14730(30) | 10140(7) | 2384(4)  | 42(3)          |
| C(7)  | 13780(20) | 9277(6)  | 2571(4)  | 41(2)          |
| C(8)  | 14940(20) | 8881(7)  | 3001(4)  | 42(2)          |
| C(9)  | 13870(20) | 8046(7)  | 3173(3)  | 43(2)          |
| C(10) | 11760(20) | 7583(8)  | 2903(4)  | 43(2)          |
| C(11) | 10620(20) | 7975(7)  | 2464(4)  | 41(2)          |
| C(12) | 8410(20)  | 7522(7)  | 2167(4)  | 38(2)          |
| C(13) | 7380(20)  | 7914(7)  | 1753(4)  | 39(2)          |
| C(14) | 8258(18)  | 8772(6)  | 1567(3)  | 32(2)          |
| C(15) | 10499(18) | 9227(6)  | 1842(3)  | 30(2)          |
| C(16) | 11581(19) | 8822(6)  | 2297(4)  | 35(2)          |
| C(17) | 4921(18)  | 8743(6)  | 834(4)   | 37(2)          |
| C(18) | 1480(20)  | 8318(6)  | 213(4)   | 38(2)          |
| C(19) | 2620(18)  | 7568(6)  | -84(3)   | 32(2)          |
| C(20) | 337(19)   | 6895(6)  | -276(4)  | 35(2)          |
| C(21) | 1320(20)  | 6096(6)  | -568(4)  | 42(2)          |
| C(22) | -880(20)  | 5381(8)  | -721(4)  | 43(2)          |
| C(23) | 110(30)   | 4591(8)  | -1041(5) | 53(3)          |
| C(24) | -2090(20) | 3896(7)  | -1187(5) | 54(3)          |
| N(1)  | 3695(15)  | 8951(5)  | 412(2)   | 31(2)          |
| O(1)  | 7485(15)  | 10479(5) | 535(2)   | 44(2)          |
| Pt(1) | 5000      | 10000    | 0        | 30(1)          |

Table 9. Bond lengths [Å] and angles [°] for P21c.

|             |           |
|-------------|-----------|
| C(1)-C(2)   | 1.418(11) |
| C(1)-C(17)  | 1.425(12) |
| C(1)-C(14)  | 1.453(12) |
| C(2)-O(1)   | 1.307(13) |
| C(2)-C(3)   | 1.446(16) |
| C(3)-C(4)   | 1.403(14) |
| C(3)-H(3)   | 0.9500    |
| C(4)-C(5)   | 1.393(13) |
| C(4)-C(15)  | 1.417(13) |
| C(5)-C(6)   | 1.337(15) |
| C(5)-H(5)   | 0.9500    |
| C(6)-C(7)   | 1.429(14) |
| C(6)-H(6)   | 0.9500    |
| C(7)-C(8)   | 1.388(14) |
| C(7)-C(16)  | 1.419(13) |
| C(8)-C(9)   | 1.398(14) |
| C(8)-H(8)   | 0.9500    |
| C(9)-C(10)  | 1.389(15) |
| C(9)-H(9)   | 0.9500    |
| C(10)-C(11) | 1.400(14) |
| C(10)-H(10) | 0.9500    |
| C(11)-C(16) | 1.391(13) |
| C(11)-C(12) | 1.452(15) |
| C(12)-C(13) | 1.328(14) |
| C(12)-H(12) | 0.9500    |
| C(13)-C(14) | 1.409(13) |
| C(13)-H(13) | 0.9500    |
| C(14)-C(15) | 1.435(12) |
| C(15)-C(16) | 1.434(12) |
| C(17)-N(1)  | 1.294(12) |
| C(17)-H(17) | 0.9500    |



|              |           |
|--------------|-----------|
| C(18)-C(19)  | 1.471(12) |
| C(18)-N(1)   | 1.482(11) |
| C(18)-H(18A) | 0.9900    |
| C(18)-H(18B) | 0.9900    |
| C(19)-C(20)  | 1.534(11) |
| C(19)-H(19A) | 0.9900    |
| C(19)-H(19B) | 0.9900    |
| C(20)-C(21)  | 1.490(12) |
| C(20)-H(20A) | 0.9900    |
| C(20)-H(20B) | 0.9900    |
| C(21)-C(22)  | 1.519(13) |
| C(21)-H(21A) | 0.9900    |
| C(21)-H(21B) | 0.9900    |
| C(22)-C(23)  | 1.524(15) |
| C(22)-H(22A) | 0.9900    |
| C(22)-H(22B) | 0.9900    |
| C(23)-C(24)  | 1.497(15) |
| C(23)-H(23A) | 0.9900    |
| C(23)-H(23B) | 0.9900    |
| C(24)-H(24A) | 0.9800    |
| C(24)-H(24B) | 0.9800    |
| C(24)-H(24C) | 0.9800    |
| N(1)-Pt(1)   | 2.000(7)  |
| O(1)-Pt(1)   | 1.953(6)  |
| Pt(1)-O(1)#1 | 1.953(6)  |
| Pt(1)-N(1)#1 | 2.000(7)  |

|                  |           |
|------------------|-----------|
| C(2)-C(1)-C(17)  | 120.2(10) |
| C(2)-C(1)-C(14)  | 120.4(9)  |
| C(17)-C(1)-C(14) | 119.3(8)  |
| O(1)-C(2)-C(1)   | 126.9(10) |
| O(1)-C(2)-C(3)   | 115.9(8)  |
| C(1)-C(2)-C(3)   | 117.2(10) |

|                   |           |
|-------------------|-----------|
| C(4)-C(3)-C(2)    | 124.3(9)  |
| C(4)-C(3)-H(3)    | 117.9     |
| C(2)-C(3)-H(3)    | 117.9     |
| C(5)-C(4)-C(3)    | 121.2(10) |
| C(5)-C(4)-C(15)   | 121.4(9)  |
| C(3)-C(4)-C(15)   | 117.2(9)  |
| C(6)-C(5)-C(4)    | 118.6(10) |
| C(6)-C(5)-H(5)    | 120.7     |
| C(4)-C(5)-H(5)    | 120.7     |
| C(5)-C(6)-C(7)    | 124.3(10) |
| C(5)-C(6)-H(6)    | 117.9     |
| C(7)-C(6)-H(6)    | 117.9     |
| C(8)-C(7)-C(16)   | 120.3(9)  |
| C(8)-C(7)-C(6)    | 122.3(10) |
| C(16)-C(7)-C(6)   | 117.4(9)  |
| C(7)-C(8)-C(9)    | 119.6(10) |
| C(7)-C(8)-H(8)    | 120.2     |
| C(9)-C(8)-H(8)    | 120.2     |
| C(10)-C(9)-C(8)   | 120.8(9)  |
| C(10)-C(9)-H(9)   | 119.6     |
| C(8)-C(9)-H(9)    | 119.6     |
| C(9)-C(10)-C(11)  | 119.5(11) |
| C(9)-C(10)-H(10)  | 120.2     |
| C(11)-C(10)-H(10) | 120.2     |
| C(16)-C(11)-C(10) | 120.7(10) |
| C(16)-C(11)-C(12) | 117.4(9)  |
| C(10)-C(11)-C(12) | 121.9(10) |
| C(13)-C(12)-C(11) | 120.3(9)  |
| C(13)-C(12)-H(12) | 119.9     |
| C(11)-C(12)-H(12) | 119.9     |
| C(12)-C(13)-C(14) | 124.8(9)  |
| C(12)-C(13)-H(13) | 117.6     |
| C(14)-C(13)-H(13) | 117.6     |

|                     |          |
|---------------------|----------|
| C(13)-C(14)-C(15)   | 116.6(8) |
| C(13)-C(14)-C(1)    | 124.4(8) |
| C(15)-C(14)-C(1)    | 118.9(8) |
| C(4)-C(15)-C(14)    | 121.8(8) |
| C(4)-C(15)-C(16)    | 119.0(8) |
| C(14)-C(15)-C(16)   | 119.1(8) |
| C(11)-C(16)-C(7)    | 119.1(9) |
| C(11)-C(16)-C(15)   | 121.8(9) |
| C(7)-C(16)-C(15)    | 119.1(9) |
| N(1)-C(17)-C(1)     | 130.7(9) |
| N(1)-C(17)-H(17)    | 114.7    |
| C(1)-C(17)-H(17)    | 114.7    |
| C(19)-C(18)-N(1)    | 111.8(8) |
| C(19)-C(18)-H(18A)  | 109.3    |
| N(1)-C(18)-H(18A)   | 109.3    |
| C(19)-C(18)-H(18B)  | 109.3    |
| N(1)-C(18)-H(18B)   | 109.3    |
| H(18A)-C(18)-H(18B) | 107.9    |
| C(18)-C(19)-C(20)   | 111.7(7) |
| C(18)-C(19)-H(19A)  | 109.3    |
| C(20)-C(19)-H(19A)  | 109.3    |
| C(18)-C(19)-H(19B)  | 109.3    |
| C(20)-C(19)-H(19B)  | 109.3    |
| H(19A)-C(19)-H(19B) | 107.9    |
| C(21)-C(20)-C(19)   | 115.4(8) |
| C(21)-C(20)-H(20A)  | 108.4    |
| C(19)-C(20)-H(20A)  | 108.4    |
| C(21)-C(20)-H(20B)  | 108.4    |
| C(19)-C(20)-H(20B)  | 108.4    |
| H(20A)-C(20)-H(20B) | 107.5    |
| C(20)-C(21)-C(22)   | 115.7(8) |
| C(20)-C(21)-H(21A)  | 108.3    |
| C(22)-C(21)-H(21A)  | 108.3    |

|                     |           |
|---------------------|-----------|
| C(20)-C(21)-H(21B)  | 108.3     |
| C(22)-C(21)-H(21B)  | 108.3     |
| H(21A)-C(21)-H(21B) | 107.4     |
| C(21)-C(22)-C(23)   | 115.4(9)  |
| C(21)-C(22)-H(22A)  | 108.4     |
| C(23)-C(22)-H(22A)  | 108.4     |
| C(21)-C(22)-H(22B)  | 108.4     |
| C(23)-C(22)-H(22B)  | 108.4     |
| H(22A)-C(22)-H(22B) | 107.5     |
| C(24)-C(23)-C(22)   | 114.5(10) |
| C(24)-C(23)-H(23A)  | 108.6     |
| C(22)-C(23)-H(23A)  | 108.6     |
| C(24)-C(23)-H(23B)  | 108.6     |
| C(22)-C(23)-H(23B)  | 108.6     |
| H(23A)-C(23)-H(23B) | 107.6     |
| C(23)-C(24)-H(24A)  | 109.5     |
| C(23)-C(24)-H(24B)  | 109.5     |
| H(24A)-C(24)-H(24B) | 109.5     |
| C(23)-C(24)-H(24C)  | 109.5     |
| H(24A)-C(24)-H(24C) | 109.5     |
| H(24B)-C(24)-H(24C) | 109.5     |
| C(17)-N(1)-C(18)    | 117.6(8)  |
| C(17)-N(1)-Pt(1)    | 121.8(6)  |
| C(18)-N(1)-Pt(1)    | 120.3(6)  |
| C(2)-O(1)-Pt(1)     | 125.6(6)  |
| O(1)#1-Pt(1)-O(1)   | 180.0     |
| O(1)#1-Pt(1)-N(1)   | 87.0(3)   |
| O(1)-Pt(1)-N(1)     | 93.0(3)   |
| O(1)#1-Pt(1)-N(1)#1 | 93.0(3)   |
| O(1)-Pt(1)-N(1)#1   | 87.0(3)   |
| N(1)-Pt(1)-N(1)#1   | 180.0(3)  |

---

Symmetry transformations used to generate equivalent atoms:

#1 -x+1,-y+2,-z

Table 10. Anisotropic displacement parameters ( $\text{\AA}^2 \times 10^3$ ) for P21c. The anisotropic displacement factor exponent takes the form:  $-2\pi^2 [h^2 a^{*2} U^{11} + \dots + 2 h k a^* b^* U^{12}]$

|       | $U^{11}$ | $U^{22}$ | $U^{33}$ | $U^{23}$ | $U^{13}$ | $U^{12}$ |
|-------|----------|----------|----------|----------|----------|----------|
| C(1)  | 28(4)    | 28(4)    | 45(5)    | 1(4)     | 8(4)     | -2(4)    |
| C(2)  | 39(6)    | 14(4)    | 46(6)    | -12(3)   | 14(5)    | 1(3)     |
| C(3)  | 43(6)    | 27(5)    | 59(6)    | -2(5)    | 14(5)    | 2(4)     |
| C(4)  | 41(6)    | 35(5)    | 30(5)    | -3(3)    | -20(4)   | 9(4)     |
| C(5)  | 42(5)    | 29(5)    | 44(5)    | 1(4)     | -14(4)   | 0(4)     |
| C(6)  | 38(6)    | 52(6)    | 36(6)    | -22(4)   | 1(5)     | 4(5)     |
| C(7)  | 40(5)    | 24(4)    | 58(6)    | -11(4)   | -6(5)    | 5(4)     |
| C(8)  | 34(5)    | 50(6)    | 42(5)    | 2(5)     | 4(4)     | 12(5)    |
| C(9)  | 45(6)    | 53(6)    | 31(5)    | 0(4)     | 9(4)     | 16(5)    |
| C(10) | 51(6)    | 36(5)    | 43(6)    | -1(4)    | -1(5)    | 16(5)    |
| C(11) | 40(5)    | 35(5)    | 49(6)    | 3(4)     | -1(4)    | 20(4)    |
| C(12) | 40(6)    | 32(5)    | 43(5)    | 9(4)     | 10(4)    | -2(4)    |
| C(13) | 30(5)    | 35(5)    | 53(6)    | -11(4)   | 1(4)     | 3(4)     |
| C(14) | 23(4)    | 33(5)    | 39(5)    | 2(4)     | -2(3)    | 6(4)     |
| C(15) | 29(4)    | 35(5)    | 26(4)    | -5(4)    | -3(3)    | 7(4)     |
| C(16) | 32(5)    | 24(4)    | 48(5)    | -3(4)    | 4(4)     | 8(4)     |
| C(17) | 20(4)    | 30(5)    | 61(6)    | -15(4)   | 9(4)     | -4(4)    |
| C(18) | 35(5)    | 22(4)    | 57(6)    | -1(4)    | 5(4)     | -11(4)   |
| C(19) | 25(4)    | 29(4)    | 41(5)    | -12(4)   | -4(4)    | 0(4)     |
| C(20) | 38(5)    | 28(4)    | 41(5)    | -4(4)    | 0(4)     | -7(4)    |
| C(21) | 30(5)    | 35(5)    | 61(6)    | -10(5)   | 4(4)     | -4(4)    |
| C(22) | 35(5)    | 45(6)    | 48(6)    | -12(5)   | 1(4)     | -3(5)    |
| C(23) | 55(7)    | 32(6)    | 74(8)    | -12(6)   | 12(6)    | 5(5)     |
| C(24) | 46(6)    | 43(6)    | 74(8)    | -15(6)   | 18(5)    | -11(5)   |
| N(1)  | 33(4)    | 31(4)    | 29(3)    | 0(3)     | 3(3)     | -4(3)    |
| O(1)  | 44(4)    | 38(4)    | 49(4)    | 5(3)     | -23(3)   | 3(3)     |
| Pt(1) | 30(1)    | 24(1)    | 35(1)    | -2(1)    | -3(1)    | -1(1)    |

Table 11. Hydrogen coordinates ( $\times 10^4$ ) and isotropic displacement parameters ( $\text{\AA}^2 \times 10^{-3}$ ) for P21c.

|        | x     | y     | z     | U(eq) |
|--------|-------|-------|-------|-------|
| H(3)   | 11111 | 11053 | 1148  | 51    |
| H(5)   | 14529 | 11085 | 1845  | 47    |
| H(6)   | 16150 | 10460 | 2573  | 50    |
| H(8)   | 16459 | 9174  | 3178  | 50    |
| H(9)   | 14595 | 7793  | 3477  | 51    |
| H(10)  | 11097 | 7004  | 3015  | 52    |
| H(12)  | 7704  | 6942  | 2269  | 46    |
| H(13)  | 5952  | 7592  | 1568  | 47    |
| H(17)  | 4217  | 8205  | 986   | 44    |
| H(18A) | 498   | 8046  | 490   | 46    |
| H(18B) | 103   | 8675  | 5     | 46    |
| H(19A) | 4043  | 7224  | 120   | 38    |
| H(19B) | 3546  | 7840  | -369  | 38    |
| H(20A) | -629  | 6651  | 11    | 43    |
| H(20B) | -1052 | 7246  | -484  | 43    |
| H(21A) | 2834  | 5780  | -371  | 50    |
| H(21B) | 2135  | 6339  | -871  | 50    |
| H(22A) | -2440 | 5702  | -904  | 51    |
| H(22B) | -1628 | 5114  | -419  | 51    |
| H(23A) | 851   | 4856  | -1345 | 64    |
| H(23B) | 1667  | 4268  | -859  | 64    |
| H(24A) | -2670 | 3570  | -892  | 81    |
| H(24B) | -1345 | 3448  | -1418 | 81    |
| H(24C) | -3703 | 4213  | -1347 | 81    |
